1 **Arabidopsis ECERIFERUM3 (CER3) Plays a Critical Role in Maintaining**  
2 **Hydration for Pollen-Stigma Recognition during Fertilization**

3

4 Faqing Xu, Xiaojing Li, Zhongnan Yang, Sen Zhang\*

5

6 College of Life Sciences, Shanghai Normal University, Shanghai 200234, China

7

8

9

10

11

12

13

14

15

16

17

18

19

20

21

22

23 Running title: CER3 and pollen-stigma recognition

24

25 Keywords: *Arabidopsis thaliana*, cell signaling, CER3, fertilization, hydration

26

27 Corresponding author: Sen Zhang. College of Life Sciences, Shanghai Normal

28 University, Shanghai 200234, China.

29 Tel: 086-021-64324650; Email: senzhang@shnu.edu.cn

30

31

32

33

34

35

36

37

38

39

40

41

42

43

44

45 **ABSTRACT** Plants distinguish the pollen grains that land on their stigmas, only  
46 allowing compatible pollen to fertilize female gametes. To analyze the underlying  
47 mechanism, conditional male-sterile mutations with affected pollen coat and disrupted  
48 pollen-stigma recognition were isolated and described. The mutant pollen failed to  
49 germinate, but germinated in vitro, suggesting that they are viable. In mutants, stigma  
50 cells that contacted their own pollen generated callose, a carbohydrate produced in  
51 response to foreign pollen. High humidity restored pollen hydration and successful  
52 fertilization, indicating defective dehydration in pollen-stigma interaction. Further  
53 analysis results from mixed pollination experiments demonstrated that the mutant  
54 pollen specifically lacked a functional pollen-stigma recognition system. The sterile  
55 plants lacked stem waxes and displayed postgenital fusion between aerial floral  
56 organs. In addition, the mutant pollen was deficient in long-chain lipids and had  
57 excess tryphine. Transmission electron microscopy observation showed that mutant  
58 pollen had almost the same surface structure as the wild type at bicellular pollen stage.  
59 However, abnormal plastoglobuli were observed in the plastids of the mutant tapetum,  
60 which was indicative of altered lipid accumulation. *CER3* transcript was found in  
61 anther tapetum and microspores at development stage 9 while CER3-GFP fusion  
62 protein was localized to the cell plasma membrane. Our data reveal that CER3 is  
63 required for biosynthesis of tryphine lipids which play a critical role in maintaining  
64 hydration for pollen-stigma recognition during fertilization.

65

66

## 67 **Introduction**

68 In flowering plants, fertilization is a series of complicated processes involving  
69 many cellular interactions between pollen and stigma until the formation of zygotes  
70 following the fusion of male-female gametes. These cellular interactions determine  
71 interspecific or self-incompatibility during fertilization where the female  
72 reproductive tissues recognize and reject the pollen grains from closely related species  
73 or from the same individual plant depending on different plant species. Crucifer  
74 species are self-incompatible. Pollen development following self-pollination is  
75 arrested primarily before the pollen grains germinate. In compatible pollination, the  
76 stigma releases water and other substances to the mature pollen grain after it is  
77 deposited on the stigma. This allows the pollen grain to germinate. During  
78 germination, a pollen tube grows quickly through the transmitting tract of the style,  
79 delivering sperms to ovules within the pistil where fertilization takes place (Swanson  
80 et al. 2004). In incompatible pollination, the stigma does not release water responding  
81 to the landing of incompatible pollen grains which, therefore, are unable to germinate.

82 Pollen hydration on dry stigma is an important and highly regulated step  
83 involved in blocking self-incompatible pollination (Hülkamp et al. 1995; Sarker et al.  
84 1988) and in rejecting foreign pollen in interspecific crosses (Dickinson et al. 1995).  
85 While the underlying mechanisms remain unclear, it was shown that several stigma  
86 and pollen coat components may play a role, including aquaporins, lipids, and  
87 proteins. For example, several putative *Arabidopsis* aquaporins are highly expressed  
88 in the stigma (Swanson et al. 2005). The *Arabidopsis* pollen coat is involved in

89 mediating the early contacts between the pollen grains and the stigma. Pollen coat  
90 originates from the tapetum layer which surrounds the developing microspores and is  
91 responsible for producing the exine precursors and pollen coat components. The  
92 pollen coat protects pollen grains from excess desiccation after anther dehiscence,  
93 contributes to pollen adhesion to the stigma, and, most importantly, facilitates pollen  
94 hydration (Edlund et al. 2004). The pollen coat protein, oleosin-domain protein  
95 GRP17, is required for the rapid initiation of pollen hydration on the stigma (Mayfield  
96 and Preuss 2000). In addition, some extracellular lipases (EXLs; Mayfield et al. 2001)  
97 were found in *Arabidopsis* pollen coat and are required for efficient pollen hydration.  
98 Mutation in *EXLA* leads to slower pollen hydration on the stigma and decreased  
99 competitiveness in pollination relative to wild type (Updegraff et al. 2009). Lipases  
100 catalyze acyl transfer reactions in extracellular environments (Upton and Buckley  
101 1995). Analyses of mutants in lipid biosynthesis indicate a role of lipids as signaling  
102 substances in mediating water release at the stigma. For instance, the *cer* mutants fail  
103 to hydrate on the stigma because of decreased lipid content in their pollen coat—a  
104 defect that can be overcome by high humidity or the application of appropriate lipids  
105 to the stigma (Preuss et al. 1993; Hülkamp et al. 1995; Wolters-Arts et al. 1998;  
106 Fiebig et al. 2004;). On the other hand, any changes of long-chain fatty acids in  
107 stigma cuticle also affect pollen hydration. An organ fusion mutant, *fiddlehead* mutant  
108 exhibits abnormal lipid content in the cuticle of vegetative tissue (Pruitt et al. 2000).  
109 *fiddlehead* mutant lacks a  $\beta$ -ketoacyl-CoA synthase that is involved in the synthesis of  
110 long-chain fatty acids (Lolle et al. 1998). In this mutant, leaf cuticle permeability

111 increases and pollen hydration is stimulated on inappropriate cell surfaces (Pruitt et al.  
112 2000). Thus, the stigma cuticle may be adjusted for suitable water permeability in  
113 response to interaction with pollen grains (Pruitt et al. 2000).

114 In this study, we provide evidence that a conditional male-sterile *Arabidopsis*  
115 mutation in *CER3* alters the tryphine structure of the pollen surface. A T-DNA  
116 insertion disrupted the expression of *CER3* and resulted in excess lipids accumulation  
117 in the tapetum and pollen coat. The mutant pollen was viable but no longer  
118 communicated properly with the stigma; pollen germination failed as a result of  
119 limited pollen hydration and synthesized callose in stigma cell wall responding to the  
120 contact of mutant pollen. High humidity or co-pollination with the wild-type pollen  
121 led to successful fertilization of *cer3-8* mutant.

122

123

## 124 **Methods**

### 125 *Plant materials*

126 Seeds of *Arabidopsis thaliana* Col-0 were sown on the vermiculite and allowed  
127 to imbibe for 3 days at 4 °C. Plants were grown in long-day conditions (16 h of light /  
128 8 h of dark) in a growth room of about 22 °C. The *cer3-8* and *cer3-9* mutant plants  
129 were isolated from the Col ecotype lines CSA306491 and CS306525 from the  
130 *Arabidopsis* Biological Resource Center (Columbus, OH), respectively. Before  
131 phenotype analysis, *cer3-8* and *cer3-9* plants were back-crossed to wild-type Col-0  
132 three or four times.

133 ***Phenotype characterization and microscopy***

134 Plants were photographed with a Canon digital camera (Powershot-A710IS).  
135 Alexander staining was performed as described (Alexander 1969). Cross sections of  
136 anthers were performed as described (Zhang et al. 2007). Scanning electron  
137 microscope and transmission electron microscope of microspores and anthers were  
138 performed as described (Zhang et al. 2007). Photographs were taken with an Olympus  
139 BX51 microscope or a Carl Zeiss confocal laser scanning microscope (LSM 5  
140 PASCAL).

141 For callose staining, emasculated wild type and *cer3-8* flowers were  
142 hand-pollinated with pollen grains from Col-0 wild type and *cer3-8* plants,  
143 respectively. Then the pistils were removed and placed on the slide and stained with  
144 aniline blue solution (0.1g / L in 50 mM K<sub>3</sub>PO<sub>4</sub> buffer, pH 7.5). The stained pistils  
145 were covered with cover glass for observation under an Olympus BX51 fluorescence  
146 microscope.

147 For the pollen in vitro germination assay, mature pollen grains were spread onto  
148 medium consisting of 18% (m / v) sucrose, 0.01% (m / v) boric acid, 1 mM CaCl<sub>2</sub>, 1  
149 mM Ca(NO<sub>3</sub>)<sub>2</sub>, 1 mM MgSO<sub>4</sub>, and 0.5% (m / v) agar (Li et al. 1999) in a humid  
150 chamber at approximately 22 °C. Single images were obtained with the Olympus  
151 BX51 microscope.

152 To analyze the hydration of pollen grains following hand-pollination, the  
153 pollinated flowers were allowed to develop for 20 minutes, the pistils were removed  
154 and placed on a slide, and the tissue were examined using an Olympus BX51

155 microscope. Hydration was assessed by the change from the elliptical shape of mature  
156 pollen grains to a nearly spherical shape. In the case of grains that failed to hydrate no  
157 change was observed.

158

### 159 *Analysis of fatty acids by GS/MS*

160 For pollen coat extraction, *Arabidopsis* inflorescences were clipped, washed in  
161 phosphate buffer and filtered through cheesecloth. The filtered solution was  
162 centrifuged to obtain a pollen pellet. The pollen coat was then removed by washing  
163 the pollen grains three times in 10 volumes of cyclohexane based on the method by  
164 Doughty et al., 1993 with few modifications. Briefly, coating was removed from  
165 pollen grains by adding 800  $\mu$ l of cyclohexane to 75 mg of pollen and agitating until  
166 suspended (5 sec). After separation by centrifugation (14,000 g, 20 sec), the  
167 cyclohexane fraction was transferred to a clean and dry eppendorf tube. Fatty acids  
168 methyl esterization was performed as previously described (Browse et al. 1986) with  
169 some modifications. Before analysis, 10  $\mu$ l of  
170 N-methyl-N-trimethylsilyl-trifluoroacetamide (Fluka) were added and incubated at  
171 37 °C for 30 min. As an internal control, 50  $\mu$ l of nonadecanoic acid methyl ester  
172 (Fluka) stock solution (2 mg / ml in cyclohexane) was added. GC-MS was performed  
173 using Agilent 5975 inert GC / MS system with an HP-INNOWax column (Agilent).

174

### 175 *Treatment of pollen grains with formaldehyde*

176 Wild-type flowers were removed from plants at the time of anthesis and placed



177 on a glass slide. The slide was placed over a puddle of 37% aqueous solution of  
178 formaldehyde inside a culture dish for the stated time period. Anthers from these  
179 flowers were then used immediately in pollen rescue experiments.

180

### 181 ***PCR and molecular cloning of the CER3 gene***

182 The T-DNA insertion sites in the mutants were verified using PAC161 vector  
183 left-border primer PAC161-LBa1 (5'-TCCCCTGATTCTGTGGATAACCG-3') and  
184 SALK line CS306491 genome-specific primers: LP306491  
185 (5'-CCTCAAACATTCCTCAGCAG-3') and RP306491  
186 (5'-TTAATGCGATGAGTCCTTTTCG-3'); and SALK line CS306525  
187 genome-specific primers: LP306525 (5'-GGACTCATCGCATTAAATTGTGC-3') and  
188 RP306525 (5'-CGAATCTTCTTTTGGAGTTCCC-3'). Co-segregation of the T-DNA  
189 insertion site and mutant phenotype was analyzed with the above LP and RP primers.  
190 For mutant plants, PCR with LB-A1-PAC161 and LP primers could amplify DNA  
191 fragments of ~1000-bp and ~700-bp, respectively. For wild-type plants, only PCR  
192 with LP and RP primers could amplify a DNA fragment of about 1154-bp (or  
193 ~880-bp). For heterozygous mutant plants, PCR with both primer pairs showed  
194 positive results.

195 For complementation experiment, a 3434-bp *CER3* genomic fragment was  
196 amplified using KOD polymerase (Toyobo) and the gene-specific primers CP-F,  
197 5'-GGTACCTACCCAATGTAAATGAATGCGG-3' and CP-R,  
198 5'-TCTAGAATTTGTGAGTGAAGAAACAGCAC-3' (*Kpn*I and *Xba*I sites were

199 underlined, respectively). The PCR product was cloned into the pMD18-T vector  
200 (Takara). After verification by sequencing, the fragment was subcloned into the binary  
201 vector pCAMBIA1300-GFP (CAMBIA; <http://www.cambia.org>) resulting in  
202 construct pCAMBIA1300-CER3-GFP, driven by its native promoter. This construct  
203 was introduced into homozygous mutant plants using the floral-dip method (Clough  
204 and Bent 1998) with *Agrobacterium tumefaciens* strain LBA4404. Transformants  
205 were selected on 1 / 2 MS medium containing 20 mg / L hygromycin and screened for  
206 fertile plants with homozygous background. For homozygous background verification,  
207 as LP / RP-amplified sequences are included in the complementation fragment, the  
208 following primers were used: LB-A1-PAC161 / RP primers to validate the existence  
209 of the T-DNA insertion in *CER3*; LP / RP primers to detect either the *CER3* genomic  
210 sequence or the transgenic complementation fragment; and genome-specific primers  
211 (CHZJD-F, 5'-TCTAGGCCTCTACTCGTCACAAT-3'; CHZJD-R,  
212 5'-AGGAGATGAGTGGTGGAAAGAGT-3') validate the homozygous background.  
213 As CHZJD-F was designed 445-bp upstream of CP-F, PCR with the CHZJD-F /  
214 CHZJD-R primer set was not able to amplify a 2.7-kb fragment in homozygous plants  
215 even if the complementation fragment was integrated into the genome.

216

### 217 ***Subcellular localization of CER3***

218 The above complementary construct pCAMBIA1300-CER3-GFP was also used  
219 for *CER3* subcellular localization experiment. This construct was transiently  
220 expressed in tobacco leaf cells via *Agrobacterium tumefaciens* strain LBA4404 as

221 described (Hu et al. 2002).

222

### 223 ***Reverse transcription (RT)-PCR***

224 Total RNA extraction, cDNA synthesis and RT-PCR analysis were performed as

225 described (Zhang et al. 2007). The primers used for RT-PCR in analyzing expression

226 level of *CER3* in *cer3-8* and *cer3-9* mutants were as follow: RT-F

227 (5'-ATGGTTGCTTTTTTATCAGCTTG-3') and RT-R

228 (5'-ATTTGTGAGTGAAGAAACAGCAC-3').

229

### 230 ***in situ hybridization***

231 Non-radioactive RNA *in situ* hybridization was performed using a digoxigenin (DIG)

232 RNA labeling kit and PCR DIG probe synthesis kit (Roche;

233 <http://www.rochediagnostics.us>) according to the manufacturer's instructions. A

234 450-bp *CER3* cDNA fragment was amplified using *CER3*-specific primers: forward

235 5'-GAATTCTTGACATTGTCTATGGAAAG-3' and reverse

236 5'-GGTACCATTTGTGAGTGAAGAAACAG-3' (*EcoRI* and *KpnI* sites were

237 underlined, respectively); The PCR product was cloned into the pBluescript SK vector

238 (Stratagene; <http://www.stratagene.com>) and confirmed by sequencing. Plasmid DNA

239 was completely digested by *EcoRI* or *KpnI*, and used as a template for transcription

240 with T3 or T7 RNA polymerase, respectively. Images were obtained with an Olympus

241 DP70 digital camera.

242

243 **Results**

244 *cer3 pollen cannot germinate on the stigma, but germinate in vitro*

245 By screening of T-DNA tagged lines from the *Arabidopsis* Biological Resources  
246 Center (ABRC), two lines CS306491 and CS306525 were isolated which exhibited  
247 sterile phenotypes (Figure 1A). These mutants grew and developed normally as  
248 wild-type plants and pollen could release onto the stigma surface (Figure 1, B–D)  
249 while no seeds were produced. Both mutant plants produced seeds when fertilized  
250 with wild-type pollen, while application of mutant pollen to either wild-type or  
251 mutant plants produced no seeds. Hence, the mutation impaired only the reproductive  
252 system. Both mutant heterozygotes were fertile and one-fourth of their progeny  
253 showed a sterile phenotype. Thus, their fertility defects were caused by a recessive  
254 mutation in a single genetic locus, respectively.

255 To identify the corresponding loci responsible for the sterile phenotype, the  
256 genomic DNA fragments flanking the borders of T-DNA were recovered by PCR.  
257 T-DNA / plant genome DNA junctions can be amplified with the T-DNA left border  
258 primer, PAC161-LBa1, and genome specific primers. Sequencing of the PCR  
259 products showed that the T-DNAs were inserted at the 88th nucleotide in the second  
260 intron of the *CER3* gene in line CSA306491, and at the 248th nucleotide in the fourth  
261 intron of the *CER3* gene in line CS306525, respectively (Figure 1E). RT-PCR analysis  
262 showed that almost no transcript of *CER3* was observed in *cer3-8* mutant, while the  
263 expression level of *CER3* was greatly reduced in *cer3-9* mutant as compared to that in  
264 the wild-type (Figure 1F). Allelic test analysis indicated that both mutants were *CER3*

265 mutation alleles. So lines CSA306491 and CS306525 were renamed as *cer3-8* and  
266 *cer3-9*, respectively. *cer3-8* mutant was used for further study here unless otherwise  
267 specified.

268 Genetic complementation experiment was performed with wild-type *CER3*  
269 genomic fragment fused in the modified pCAMBIA 1300 vector. Totally 10  
270 transformants were obtained, and PCR analysis results showed that all the transgenic  
271 plants were homozygous *cer3-8*. These plants were all fertile with long siliques  
272 (Figure 1A). These data indicated that mutation of *CER3* is responsible for the sterile  
273 phenotype. To explore the mechanism of male sterility of *cer3* mutants, both mutant  
274 anthers were analyzed with Alexander staining method (Alexander, 1969). The results  
275 showed that the pollen of both mutant and wild type plants were stained purple,  
276 indicative of viable pollen (Figure 1, G–I). Further experiment was performed to  
277 examine the germination ability of the mutant pollen. In wild type plants, pollen at the  
278 stigma surface usually germinates a pollen tube to deliver sperms to the ovules. Along  
279 with the tube growth, certain amount of callose is produced (Figure 1J) (Eschrich and  
280 Currier 1964). However, no pollen tubes were observed on self-pollinated mutant  
281 stigmas (Figure 1L), neither when the mutant pollen was applied to wild-type stigmas  
282 (Figure 1K). Thus, the defect in early pollen germination may account for the  
283 observed male sterility in the mutant plants.

284 Interestingly, callose was found on the stigma surface with the phenotype  
285 associated with the *cer3-8* defect. Stigmatic papillae in direct contact with *cer3-8*  
286 pollen (Figure 1K), but not wild-type pollen (Figure 1J) were highly fluorescent when

287 stained with aniline blue, indicating that the mutant pollen stimulated callose  
288 formation in the stigma cell. This phenotype was observed in all sterile segregants  
289 from *cer3-8/+* heterozygotes and, thus, was attributed to the *cer3-8* mutation. The  
290 abnormal callose formation responding to the contact of mutant pollen was also  
291 observed when the mutant pollen was applied to the wild-type stigma but not when  
292 wild-type pollen was applied to mutant stigma (Figure 1, K–M). Thus, mutation of  
293 *CER3* makes pollen fail to germinate on the stigma and induces callose formation  
294 within the stigma cells.

295 Pollen from most plant species germinates effectively when cultivated in a  
296 medium containing sucrose, calcium, magnesium and borate (Li et al. 1999).  
297 Interestingly, when *cer3-8* pollen was cultivated in this medium, the pollen  
298 germinated almost the same as wild type (Figure 2). These results indicated that  
299 *cer3-8* pollen is viable and can produce, in vitro, all of the substances needed for  
300 pollen germination and tube growth.

301

### 302 *cer3-8 mutant pollen cannot hydrate on the stigma*

303 To explore the nature of pollen not germination on the stigma of the *cer3-8*  
304 mutant, pollen hydration was first checked on the hand-pollinated stigmas. Wild-type  
305 stigmas were hand-pollinated and a few minutes later the stigmas were examined. The  
306 pollen can be found clearly undergone hydration turning into a spherical shape  
307 from the unhydrated (Figure 3, A–C). When the mutant pollen was placed on their  
308 own stigma, no hydration took place for longer period of time (Figure 3, D–F).

309 Further examination indicated that no hydration took place even when the mutant  
310 pollen was put on the wild-type stigma (Figure 3, G–I). Additional assays were  
311 performed with mutant pollen to determine whether they were capable of hydration  
312 after longer periods on the stigma, however no hydration was observed even several  
313 hours after pollination of 208 pollen, while 189 wild-type pollen were all hydrated.

314 The *cer3-8* pollen not hydration on the stigma, coupled with the germination of  
315 the mutant pollen in vitro, suggested that the *cer3-8* fertilization defect might be  
316 overcome by artificially wetting the pollen. To test this hypothesis, *cer3-8* plants were  
317 moved from normal growth condition (50-70% relative humidity) to a high-humidity  
318 environment (90% relative humidity). Fertility was restored as indicated by the  
319 expanded siliques in the mutant plants (Figure 3, J and K). The hydration of pollen  
320 was presumably facilitated by the passive absorption of water vapor from the  
321 environment (Figure S1). Thus, the effects on pollen function caused by *cer3-8*  
322 mutation are considered conditional and reversible.

323

#### 324 *cer3-8 mutant specifically lacks recognition competence*

325 The experiments described above suggested that the stigma can recognize  
326 different pollen, allowing hydration of wild-type but not *cer3-8* pollen. These data  
327 implied that the mutation affected the signal that was carried by the pollen and was  
328 required for the recognition of the pollen by the stigma. Thus, to further analyze the  
329 requirements for pollen hydration, *cer3-8* flowers were co-pollinated with wild-type  
330 and *cer3-8* pollen, by carefully placing the pollen side by side. As expected, viable

331 seeds were produced. Interestingly, these seeds not only yielded fertile, *cer3* / + plants,  
332 but also infertile, *cer3* / *cer3* plants, indicating that the wild-type pollen elicited  
333 *cer3-8* pollen hydration. Pollination with a mixture of the two types of pollen (1 : 1)  
334 results in 39.5% homozygous mutant plants and 60.5% heterozygotes, suggesting that  
335 the rescue effect of mutant pollen was fairly effective. These results indicated that  
336 interaction between the wild-type pollen and the stigma can result in hydration of  
337 nearby mutant pollen.

338 In the above pollen rescue experiment, the rescuing pollen not only hydrate, but  
339 also germinate and enter the stigma surface. In order to determine the process  
340 involved in the rescue experiment, further analysis was carried out. Wild-type pollen  
341 was made inviable by treatment with formaldehyde vapor and then mixed with *cer3-8*  
342 pollen. Wild-type pollen treated in this way can hydrated on the stigma but did not  
343 germinate and develop further. The mixed pollen was placed on the *cer3-8* stigma,  
344 and the number of seeds produced per flower was determined (Table 1). The results  
345 indicated that the mutant can be rescued by the wild-type pollen that were capable of  
346 eliciting water transfer but were unable to germinate and enter the stigma surface.  
347 These results clearly demonstrate that the defect in the mutant is only limited to the  
348 hydration step of fertilization.

349

350 **Table 1 Rescue of *cer3-8* mutant with formaldehyde treated wild-type pollen**

| Mutation      | self <sup>a</sup> | self<br>+<br>FA treated pollen <sup>b</sup> | FA treated pollen <sup>c</sup> |
|---------------|-------------------|---------------------------------------------|--------------------------------|
| <i>Cer3-8</i> | 0.3               | 14.2                                        | 8.1                            |

351 Numbers in the table are the mean number of seeds produced per silique. Each entry is the mean



352 of 10 siliques.

353 <sup>a</sup>Mean number of seeds set after self-pollination of the mutant.

354 <sup>b</sup>Mean number of seeds set after co-pollination with self-pollen and wild-type pollen treated for 5  
355 min with formaldehyde vapor.

356 <sup>c</sup>Mean number of seeds set after pollination with formaldehyde-treated wild-type pollen alone.

357

### 358 ***cer3-8 mutant is deficient in wax production with organ fusion***

359 In addition to its male sterility, the *cer3-8* mutant was also defective in the  
360 production of waxes on the stem surface. Wax is composed of long-chain lipids and is  
361 visualized easily on the surface of wild-type stems as a dull, glaucous covering. By  
362 contrast, stems from the *cer3-8* mutant looked bright green and glossy in appearance  
363 (Figure 4A), resembling other wax-defective, *cer* mutants (Dellaert et al. 1979;  
364 Koomneef et al. 1989). Besides, postgenital fusions were observed between some  
365 aerial organs in the *cer3-8* mutant (Figure 4). Specifically, fusions were found to  
366 occur among stamens and styles and sepals (Figure 4B), and between different flower  
367 petals (Figure 4C). These results suggest that mutation of *CER3* affects the production  
368 of wax on the stem surface and some floral organs.

369

### 370 ***cer3-8 pollen is deficient in long-chain lipids***

371 As described above, the *cer3-8* mutants are defective in wax production and  
372 pollen germination, suggesting that lipids might play a role in pollen-stigma signaling.  
373 The lipid content of wild-type and *cer3-8* pollen coat was characterized and compared  
374 to examine whether long-chain lipids were present in the *cer3-8* mutant. Pollen coat  
375 lysates were prepared and extracted with cyclohexane, and the components in the  
376 organic phase were subsequently separated and analyzed by gas

377 chromatography-mass spectrometry (GC-MS). All lipids detected by GC-MS were  
378 compared between mutant and wild type extracts (Figure 5), and several long-chain  
379 lipid compounds in wild-type pollen coat were missing or accumulated less in the  
380 mutant. The identity of these molecules was confirmed by analysis of their mass  
381 spectra, and their relative abundance is shown in Table 2. Twenty-nine-carbon (C29)  
382 molecules (nonacosene, n-nonacosane) were easily detected in the wild-type sample,  
383 but only a small fraction of these lipids (0-1% of wild-type levels) was found in the  
384 *cer3-8* extract, and 30-carbon molecules were not present at all (Table 2). Although  
385 long-chain lipid molecules were low in abundance, there were more abundant  
386 medium-chain lipids (16 and 18 carbons) in the mutant pollen coat (Figure 5). These  
387 results indicated that *cer3-8* mutants cannot extend lipid chains to a length of  
388 29-carbon atoms or longer.

389

390 **Table 2 Lipid content in tryphine from *cer3-8* and wild-type pollen**

| Number of carbon atoms | Compound          | Wild type | <i>cer3-8</i> |        |
|------------------------|-------------------|-----------|---------------|--------|
| 16                     | hexadecanoic acid | 4.80      | 10.01         | (2.10) |
| 18                     | octadecanoic acid | 31.77     | 39.0          | (1.23) |
| 26                     | hexacosane        | 2.78      | 1.91          | (0.69) |
| 29                     | nonacosene        | 5.91      | 0.06          | (0.01) |
| 29                     | n-nonacosane      | 2.83      | 0.0           | (--)   |
| 30                     | n-triacontane     | 8.52      | 0.0           | (--)   |

391 Values represent percent of total lipids in pollen lysates. Identification of compounds was  
392 determined by analysis of their mass spectra, and quantitation is based on integration of total peak  
393 area from the ion chromatogram. Parentheses indicate fold-change from wild-type extracts.

394

395 ***cer3-8* mutant fertility can be restored by long-chain lipids**

396 The above phenotype analyses of *cer3-8* mutation regarding pollen hydration

397 defect and long-chain lipid deficiency in the pollen coat indicate the important role of  
398 long-chain lipids in pollen–stigma recognition during pollination. Thus, exogenous  
399 long-chain lipid melissic acid dissolved in chloroform was applied to a 37-day-old  
400 *cer3-8* mutant stigma surface (Figure 6C) with chloroform as control (Figure 6A).  
401 Elongated siliques were observed on the mutant plant treated with melissic acid 7  
402 days later (Figure 6D), while siliques on the control plant were not changed (Figure  
403 6B). These results demonstrated that fertility was restored by the exogenous  
404 application of long-chain lipids, suggesting that long-chain lipids are involved in  
405 pollen-stigma communication.

406

#### 407 *cer3-8* mutation leads to smooth pollen surface

408 As described above, the effect of *cer3-8* mutation on male sterility is sporophytic,  
409 so this gene must be active in the diploid tissues. Its activity could be involved either  
410 in the pollen mother cell prior to meiosis or the tapetal cell surrounding the  
411 microspore. In order to study the surface structure of the *cer3-8* mutant pollen, the  
412 pollen was examined by scanning electron microscopy (SEM). Compared with wild  
413 type, many *cer3-8* pollen were abnormally stuck together (Figure 7, A and B), and the  
414 exquisite reticulate pattern of wild type pollen was not prominent in the mutant;  
415 instead excess coating was observed on the *cer3-8* pollen surface (Figure 7, C and D).  
416 SEM observation of FAA treated pollen further confirmed that some *cer3-8* pollen  
417 were stuck together (Figure 7, E and F), and surface of the *cer3-8* pollen was different  
418 from that of the wild-type (Figure 7, G and H).

419 In order to examine the origin of the excess pollen coating, transmission electron  
420 microscopy (TEM) experiment was carried out with developing anthers from the  
421 *cer3-8* and wild type plants. At the tetrad stage, numerous small and large  
422 electron-translucent vesicles were observed throughout the tapetum in the wild type  
423 and *cer3-8* plants (Figure 7, I and J). No obvious structural differences in the tapetum  
424 were observed at this time. At the uninucleate microspore stage in the wild type, the  
425 plastids contained numerous large, electron-transparent vesicles known as  
426 plastoglobuli (Figure 7K). In *cer3-8* mutant, the appearance of the plastids was similar  
427 to that in the wild type (Figure 7L). However, electron-dense granules were observed  
428 in the plastids of *cer3-8* mutant (Figure 7I; big arrow). At the bicellular pollen stage in  
429 the wild type, the plastids developed to relatively translucent elaioplasts consisting of  
430 compacted plastoglobuli (Figure 7M). However, the elaioplasts of *cer3-8* appeared to  
431 be less translucent, full of electron-dense granules indicative of lipid accumulation in  
432 the plastoglobuli, suggesting that the mutant plastids did not fully develop into  
433 elaioplasts (Figure 7N). At the same time no obvious differences were observed  
434 between the pollen exine of them (Figure 7, O and P). At the tricellular pollen stage in  
435 the wild type and the *cer3-8*, the tapetum was completely degenerated, and all the cell  
436 remnants were released and deposited on the maturing pollen surface. The *cer3-8*  
437 pollen was found to be covered with excess coating compared with that of the  
438 wild-type (Figure 7, Q and R). These data suggested that disruption of *CER3* may  
439 disturb the synthesis of precursors of tryphine from the tapetum to the developing  
440 pollen till the complete degeneration of the tapetum.

441 ***CER3 is highly expressed in the tapetum and microspore***

442 Previous studies have shown that *CER3* was expressed in siliques, stems, rosette  
443 leaves, cauline leaves, flower buds and open flowers, but not in roots (Ariizumi et al.  
444 2003). To further study the functions of *CER3* during microspore development, RNA  
445 *in situ* hybridization experiment was performed to examine the precise spatial and  
446 temporal expression pattern of *CER3* during wild type anther development. The  
447 results showed that *CER3* transcript was initially detected at anther stage 7 and 8  
448 tapetum (Figure 8, A and B). The highest hybridization signal was observed at stage 9  
449 tapetum and microspores (Figure 8C ). Then the signal was gradually reduced in the  
450 tapetum and microspores from stage 10 to 11 (Figure 8, D and E). By contrast, the  
451 control was barely detected at the stage 9 anther (Figure 8F). These results suggest  
452 that *CER3* is required for postmeiosis pollen development.

453

454 ***CER3 is a plasma membrane-localized protein***

455 The former study has reported that the *CER3* gene encodes a protein of 632  
456 amino acid residues which was predicted to be localized to the plasma membrane  
457 (Ariizumi et al. 2003). Our bioinformatics analysis confirmed six putative  
458 transmembrane regions in *CER3* (Figure 9A) (Chen et al. 2003; Kurata et al. 2003).  
459 Experimentally, a *CER3*-GFP fusion driven by the *CER3* native promoter was  
460 generated in the modified pCAMBIA 1300 vector, and 35S-GFP was used as a control.  
461 These constructs were introduced into tobacco leaves as described (Hu et al. 2002).  
462 As shown in Figure 9, GFP was distributed throughout the cell expressing the control

463 construct (Figure 9B), while the CER3-GFP was observed on the plasma membrane  
464 of the cell, indicating that CER3 is a plasma membrane-localized protein (Figure 9C).

465

466

## 467 **Discussion**

468 The *cer3-8* mutants produce pollen that cannot send appropriate signals to the  
469 *Arabidopsis* stigma. At normal growth conditions, the mutant pollen does not hydrate  
470 and germinate on the stigma. Moreover, the appearance of callose in the stigma  
471 contacting the *cer3-8* pollen indicated an aberrant pollen-stigma interaction. In vitro  
472 germination data indicate that *cer3-8* pollen is viable. Besides, the defective fertility is  
473 recovered when the mutants grow in a high humid environment or when mutant  
474 pollen is co-pollinated with wild-type pollen. Thus, *cer3-8* represents a conditional,  
475 male-sterile mutation that specifically affects pollen function. Wax deficiency on the  
476 *cer3-8* plants indicates that long-chain lipids might be required for pollen function.  
477 Actually, the *cer3-8* mutant pollen lack long-chain lipids compared with the wild-type  
478 (Figure 5) in spite that *cer3-8* pollen were covered with excess coating. The excess  
479 covering was due to the final dumping release and deposition of the remnants  
480 abnormally accumulated from degenerated tapetum because of the disruption of *CER3*  
481 gene.-

482 The stigma papillae cells are receptive to pollen binding. Stigmas are usually  
483 classified into two types (wet and dry stigmas) based on the extracellular matrix that  
484 covers their surface. Wet stigmas are covered with sticky secretions, while dry

485 stigmas are coated with a protein-containing pellicle (Heslop-Harrison and Shivanna  
486 1977; Heslop-Harrison 1981; Heslop-Harrison 1992). The carbohydrate and lipid-rich  
487 matrix on the surface of wet stigmas may promote the hydration of most pollen. By  
488 contrast, dry stigmas may selectively promote pollen hydration (Roberts et al. 1980;  
489 Sarker et al. 1988; Preuss et al. 1993). Pollen hydration is the first step blocked in a  
490 self-incompatible pollination (Dickinson and Elleman 1985; Dickinson 1995). The  
491 analysis of wax-defective, *cer* mutations has demonstrated that the pollen coat is  
492 required for pollen hydration (Preuss et al. 1993; Hülkamp et al. 1995). The *CER*  
493 genes are known to function in wax biosynthesis (Hannoufa et al. 1993), producing  
494 long-chain lipids that cover the surface of the stems and leaves, as well as the pollen  
495 (Preuss et al. 1993). Mutations in these genes affect the amount of lipids in the pollen  
496 coat, and this deficiency may induce the loss of coat proteins and other components  
497 during development. Consequently, *cer* defects may influence an array of molecular  
498 interactions that normally occur between the pollen coat and the stigma.

499         So, the pollen coat lipid and protein are considered to be essential for pollen  
500 hydration. In contacting with wild-type pollen, the pollen coat could be changed,  
501 forming a contact zone between the stigma and the pollen (Elleman and Dickinson  
502 1996). In this process, long-chain lipids and some other substances in the pollen coat  
503 are considered to signal and to be reorganized by the stigma through the actions of the  
504 lipid-binding proteins, and to create a capillary system through which water can flow  
505 from the stigma to the pollen (Murphy 2006).

506         The results of reduced or altered lipid composition on the pollen surface can be

507 analyzed at the ultrastructural level. Previous study showed that a mutation in the  
508 *CER6* resulted in pollen without the tryphine layer (Preuss et al. 1993). Another  
509 partially sterile *CER6* mutant exhibited a reduced tryphine layer with reduced number  
510 and size of lipid drops. These results indicated that lipid products of the *cer* pathway  
511 are required as a binding agent to hold the tryphine layer to the pollen. In the tryphine  
512 layer lipid drops are missing in *cer1-147*, or are reduced in size in *cer6-2654* even  
513 though their pollen showed normal coat thickness (Hülkamp et al. 1995). These data  
514 implied that long-chain lipids may play an indirect role in solubilizing some other  
515 recognition factors present in the tryphine layer. Under the growth conditions used  
516 here, the *cer3-8* mutant produced stem and flower with less wax, pollen with excess  
517 tryphine that fails to germinate on the stigma surface, resulting in male sterility. The  
518 phenotype of *cer3-8* pollen coat structure was apparently different from the above  
519 described *cer* mutants. All of these results imply that lipids play important roles in the  
520 tryphine regarding pollen-stigma signaling and pollen hydration.

521 In wild-type *Arabidopsis* anther, the tapetum surrounds the microspore and  
522 provides materials for microspore development (Scott et al. 1991). At later stages in  
523 pollen development, the tapetum accumulates lipidic components in the pollen coat,  
524 which may be transported to the exine by transporters located at the tapetal cell  
525 membrane. TEM analyses of developing anther revealed that the elaioplasts in the  
526 mutant tapetum did not completely form till anther stage 12, suggesting that lipids  
527 might accumulate in the mutant tapetum (see results above). Other studies have  
528 reported that *CER3* is a core component of the complex required for synthesizing



529 long-chain alkane and essential for the production of long-chain lipids (Bernard et al.  
530 2012). Lipids biosynthesis might be affected in *cer3-8* mutant due to the mutation of  
531 *CER3* gene. Besides, excess tryphine was found on the surface of *cer3-8* pollen at  
532 maturity. So, disruption of *CER3* may influence biosynthesis of long-chain lipids,  
533 leading to *cer3-8* mutant phenotypes.

534 The reduction in 29-carbon and 30-carbon lipid level (Hannoufa et al. 1993;  
535 Preuss et al. 1993; the present study) is the common feature of all *cer* mutants. Hence,  
536 these long-chain lipid molecules are necessary for pollen-stigma interactions, either  
537 for directly signaling the stigma or for stabilizing other essential molecules. Further  
538 characterization of the *CER* gene products, including identification of their  
539 biochemical functions, should further elucidate the role of lipids in pollen-stigma  
540 communication, not only in *Arabidopsis*, but in other angiosperms as well.

541

542

### 543 **Acknowledgements**

544 We thank the Salk Institute for providing seeds of *Arabidopsis* T-DNA insertion lines.

545

546

### 547 **Funding**

548 The work was supported by a grant from the National Natural Science Foundation of  
549 China (31271295).

550

551 **Tables:**

552

553 **Table 1 Rescue of *cer3-8* mutant with formaldehyde treated wild-type pollen**

| Mutation      | self <sup>a</sup> | self<br>+<br>FA treated pollen <sup>b</sup> | FA treated pollen <sup>c</sup> |
|---------------|-------------------|---------------------------------------------|--------------------------------|
| <i>Cer3-8</i> | 0.3               | 14.2                                        | 8.1                            |

554 Numbers in the table are the mean number of seeds produced per silique. Each entry is the mean  
555 of 10 siliques.

556 <sup>a</sup>Mean number of seeds set after self-pollination of the mutant.

557 <sup>b</sup>Mean number of seeds set after co-pollination with self-pollen and wild-type pollen treated for 5  
558 min with formaldehyde vapor.

559 <sup>c</sup>Mean number of seeds set after pollination with formaldehyde-treated wild-type pollen alone.

560

561 **Table 2 Lipid content in tryphine from *cer3-8* and wild-type pollen**

| Number of<br>carbon atoms | Compound          | Wild type | <i>cer3-8</i> |        |
|---------------------------|-------------------|-----------|---------------|--------|
| 16                        | hexadecanoic acid | 4.80      | 10.01         | (2.10) |
| 18                        | octadecanoic acid | 31.77     | 39.0          | (1.23) |
| 26                        | hexacosane        | 2.78      | 1.91          | (0.69) |
| 29                        | nonacosene        | 5.91      | 0.06          | (0.01) |
| 29                        | n-nonacosane      | 2.83      | 0.0           | (--)   |
| 30                        | n-triacontane     | 8.52      | 0.0           | (--)   |

562 Values represent percent of total lipids in pollen lysates. Identification of compounds was  
563 determined by analysis of their mass spectra, and quantitation is based on integration of total peak  
564 area from the ion chromatogram. Parentheses indicate fold-change from wild-type extracts.

565

566

567 **Figure legends**

568

569 **Figure 1** Phenotype characterization of *CER3* mutant alleles.

570 (A) Wild type, *cer3-8*, *cer3-9* and *cer3-8* complemented plant images. (B) Wild-type (Col-0)

571 flower. (C) *cer3-8* flower. (D) *cer3-9* flower. (E) Schematic representation of the genomic region

572 of *CER3* gene. Boxes represent exons and lines indicate introns (not to scale). Triangles indicate

573 the T-DNA insertion sites of *cer3-8* and *cer3-9* plants in the *CER3* gene, respectively. Arrows  
574 indicate oligonucleotide primer pairs LP1/RP1 and LP2/RP2 used for molecular characterization  
575 of the T-DNA loci. (F) Expression analysis of the *CER3* gene in wild-type (Col-0), *cer3-8* and  
576 *cer3-9* plants. *TUB*, *TUBULIN*. (G) A wild-type anther with viable pollen grains (stained). (H) A  
577 *cer3-8* anther with viable pollen grains (stained),  
578 (I) A *cer3-9* anther with viable pollen grains (stained). (J) Wild-type stigma pollinated with  
579 wild-type pollen and stained with aniline blue, showing fluorescent pollen tube (arrowhead). (K)  
580 Wild-type stigma pollinated with *cer3-8* pollen and stained with aniline blue, showing fluorescent  
581 callose (asterisk). (L) *cer3-8* stigma pollinated with *cer3-8* pollen and stained with aniline blue,  
582 showing fluorescent callose (asterisk). (M) *cer3-8* stigma pollinated with wild-type pollen and  
583 stained with aniline blue, showing fluorescent pollen tube (arrowhead). Arrows show pollen  
584 grains in j to m. Bars = 40  $\mu$ m in (J and K); bars = 20  $\mu$ m in (L and M).

585

586 **Figure 2** Germination of wild-type and *cer3-8* pollen in vitro.

587 Pollen tubes were observed after wild-type (A) or *cer3-8* (B) pollen grains were incubated in  
588 pollen germination medium. (C and D) close-up views of (A and B), respectively.

589 Bars = 100  $\mu$ m in (A and B); bars = 1500  $\mu$ m in (C and D).

590

591 **Figure 3** Hydration of wild-type, but not *cer3-8*, pollen occurred rapidly on the stigma surface  
592 (A-I), and high humidity resumed male fertility of *cer3-8* (J) and *cer3-9* (K).

593 Wild-type pollen (A-C) expands within minutes when placed on a wild-type stigma surface. No  
594 change in pollen shape or size was observed in similar experiments with *cer3-8* pollen on a *cer3-8*

595 (D-F) or a wild-type stigma surface (G-I) for longer period of time. Numbers (in the upper right  
596 corner) indicate time in minutes. Arrows indicate pollen grains. The examples depicted here are  
597 representative of similar observations of >100 pollen grains. Bars = 40  $\mu\text{m}$  in (A-I). (J, K)  
598 Humidity restored fertility in *cer3-8* and *cer3-9* plants, respectively. The plants grown in 50-70%  
599 relative humidity transferred to 90% relative humidity. Expanded seed pods (indicated by  
600 arrowheads) show that fertilization has occurred.

601

602 **Figure 4** *cer3-8* mutants are defective in epicuticular wax production, and postgenital fusion  
603 occurs between some floral organs.

604 (A) *cer3-8* plants are deficient in the waxes that coat wild-type stems. Postgenital fusion does not  
605 occur in wild type flowers (Figure 1 B). Postgenital fusions occur between the stamen and style  
606 and sepal (B) as well as between petals (C) of different flowers in the mutants.

607

608 **Figure 5** *cer3-8* pollen is deficient in long-chain lipids.

609 Pollen coat lysates were extracted with cyclohexane and analyzed by gas chromatography-mass  
610 spectroscopy. The wild-type extract contains 29- and 30-carbon lipids (identified in Table 2),  
611 whereas these compounds are virtually absent from the *cer3-8* extract. The data were analyzed  
612 from three biological replicates and presented as average SD. The statistics analysis was  
613 performed using student's t-test (\*\* $p < 0.01$ ; \* $P < 0.05$ ).

614

615 **Figure 6** Fertility restoration of *cer3-8*

616 Fertility of *cer3-8* was resumed as indicated by expanded siliques (showed by arrows in D) by

617 application of melissic acid on the mutant floral buds (C) with application of chloroform on the  
618 mutant buds as control (A, B). Melissic acid dissolved in chloroform (25 µg / µl).

619

620 **Figure 7** TEM analysis of the pollen surface (A-H), tapetum and pollen development in later  
621 stage anthers (I-R).

622 (A) Wild-type pollen. (B) Some *cer3-8* pollen stuck together (arrowhead). (C) Wild-type pollen  
623 with exquisite reticulate pattern. Bar = 3 µm. (D) *cer3-8* pollen showing excess coating. (E) FAA  
624 treated wild-type pollen. (F) FAA treated *cer3-8* pollen stuck together (arrowheads). (G) Close-up  
625 view of wild-type pollen. (H) Close-up view of *cer3-8* pollen showing different surface from wild  
626 type. (I) Tetrad stage wild-type tapetum. (J) Tetrad stage *cer3-8* tapetum. (K) Uninucleate  
627 microspore stage wild-type tapetum, showing normal plastoglobuli. (L) Uninucleate microspore  
628 stage *cer3-8* tapetum, showing electron-dense plastoglobuli. (M) Bicellular pollen stage wild-type  
629 tapetum, showing translucent elaioplasts with compacted plastoglobuli. (N) Bicellular pollen stage  
630 *cer3-8* tapetum, showing less translucent elaioplasts with electron-densed plastoglobuli. (O)  
631 Bicellular pollen stage wild-type pollen. (P) Bicellular pollen stage *cer3-8* pollen showing similar  
632 exine to wild type. (Q) Tricellular pollen stage wild-type pollen. (R) Tricellular pollen stage *cer3-8*  
633 pollen with excess coating. Bars = 1 µm in (I to R). T, tapetum; M, middle layer; P, plastid; El,  
634 elaioplast; E, exine; PC, pollen coat.

635

636 **Figure 8** Expression pattern of *CER3*.

637 Cross-sections through wild-type anthers at different stages of development probed with  
638 digoxigenin-labeled *CER3* antisense or sense probes.

639 (A) Stage 7 anther, showing that *CER3* was slightly expressed in the tapetum. (B) Stage 8 anther,  
640 showing that *CER3* was slightly expressed in the tapetum. (C) Stage 9 anther, showing that *CER3*  
641 was strongly expressed in the tapetum and microspores. (D) Stage 10 anther, showing that *CER3*  
642 was highly expressed in the tapetum and microspores. (E) Stage 11 anther, showing that *CER3*  
643 was slightly expressed in the tapetum and microspores. (F) Sense probe showing almost no  
644 hybridization signal. Bars = 15  $\mu$ m. T, tapetum; MSp, microspore.

645

646 **Figure 9** Subcellular localization of *CER3*.

647 The transient expression in the infiltrated tobacco leaf cells was carried out for subcellular  
648 localization. (A) The transmembrane domain in *CER3* protein was predicted using TMHMM  
649 (<http://www.cbs.dtu.dk/services/TMHMM/>). (B) Subcellular localization of 35S-GFP fluorescence  
650 in transient transgenic tobacco leaf cells. Green fluorescence was dispersed throughout the cell. (C)  
651 Subcellular localization of *CER3*:GFP fluorescence in transient transgenic tobacco leaf cells.  
652 Green fluorescence indicates the localization of *CER3*:GFP protein in the epidermis cell  
653 membrane. The insert shows plasmolyzed epidermis cells treated with 0.8 M mannitol, where  
654 arrows indicate plasmolysis.

655

## 656 **Supporting Information**

657

658 **Figure. S1.** The hydration of *cer3* pollen on the *cer3* stigma was rescued under high humidity.  
659 Pollen expands (arrows) with shape changing from elliptic (A) to global (B-D) along with time  
660 course when placed on the *cer3* stigma surface, indicating that the *cer3* pollen is hydrated.

661 Numbers (upper right corner) show times in minutes. The examples depicted here are  
662 representative result of more than 100 pollen grains. Bar = 100  $\mu$ m in (A-D).

663

664

## 665 **Literature Cited**

666 Alexander MP, 1969 Differential staining of aborted and non aborted pollen. *Stain*  
667 *Technol* 44:117–122. <https://doi.org/10.3109/10520296909063335>

668 Ariizumi T, Hatakeyama K, Hinata K, Sato S, Kato T et al, 2003 A novel  
669 male-sterile mutant of *Arabidopsis thaliana*, faceless pollen-1, produces pollen  
670 with a smooth surface and an acetolysis-sensitive exine. *Plant Mol Biol*  
671 53:107–116. <https://doi.org/10.1023/B:PLAN.0000009269.97773.70>

672 Bernard A, Domergue F, Pascal S, Jetter R, Renne C *et al.*, 2012 Reconstitution of  
673 plant alkane biosynthesis in yeast demonstrates that *Arabidopsis*  
674 *ECERIFERUM1* and *ECERIFERUM3* are core components of a very-long-chain  
675 alkane synthesis complex. *Plant Cell* 24: 3106–3118.  
676 <http://www.jstor.org/stable/23264761>

677 Browse J, McCourt PJ, Somerville CR, 1986 Fatty acid composition of leaf lipids  
678 determined after combined digestion and fatty acid methyl ester formation from  
679 fresh tissue. *Anal Biochem* 152:141–145.  
680 [https://doi.org/10.1016/0003-2697\(86\)90132-6](https://doi.org/10.1016/0003-2697(86)90132-6)

681 Chen X, Goodwin M, Boroff VL, Liu X, Jenks MA, 2003 Cloning and  
682 characterization of the *WAX2* gene of *Arabidopsis* involved in cuticle membrane

683 and wax production. *Plant Cell* 15:1170–1185.

684 <http://www.jstor.org/stable/3871785>

685 Clough SJ, Bent AF, 1998 Floral dip: a simplified method for

686 *Agrobacterium*-mediated transformation of *Arabidopsis thaliana*. *Plant J*

687 16:735–743. <https://doi.org/10.1046/j.1365-313x.1998.00343.x>

688 Dellaert LMW, Van Es JYP, Koomneef M, 1979 Eceriferum mutants in *Arabidopsis*

689 *thaliana* (L.) Heynh: Phenotypic and genetic analysis. *Arabid. Inf Serv*

690 16(1979):10-26. <http://dx.doi.org/>

691 Dickinson H, 1995 Dry stigmas, water and self-incompatibility in Brassica. *Sex Plant*

692 *Reprod* 8:1–10. <https://doi.org/10.1007/BF00228756>

693 Dickinson HG, Elleman CJ, 1985 Structural-changes in the pollen grain of Brassica

694 oleracea during dehydration in the anther and development on the stigma as

695 revealed by anhydrous fixation techniques. *Micron and Microscopica Acta*

696 16:255–270. [https://doi.org/10.1016/0739-6260\(85\)90050-4](https://doi.org/10.1016/0739-6260(85)90050-4)

697 Doughty J, Hedderson F, McCubbin A, Dickinson H, 1993 Interaction between a

698 coating-borne peptide of the Brassica pollen grain and stigmatic S

699 (self-incompatibility)-locus-specific glycoproteins. *Proc Natl Acad Sci USA*

700 90:467-471. <https://doi.org/10.1073/pnas.90.2.467>

701 Edlund AF, Swanson R, Preuss D, 2004 Pollen and stigma structure and function: the

702 role of diversity in pollination. *Plant Cell* 16(Suppl):S84–S97.

703 <https://doi.org/10.1105/tpc.015800>

704 Elleman CJ, Dickinson HG, 1996 Identification of pollen components regulating



- 705       pollination-specific responses in the stigmatic papillae of *Brassica oleracea*. *New*  
706       *Phytologist* 133:197–205. <https://doi.org/10.1111/j.1469-8137.1996.tb01886.x>
- 707       Eschrich W, Currier HB, 1964 Identification of callose by its diachrome and  
708       fluorochrome reactions. *Stain Technol* 39:303-307.  
709       <https://doi.org/10.3109/10520296409061248>
- 710       Fiebig A, Kimport R, Preuss D, 2004 Comparisons of pollen coat genes across  
711       Brassicaceae species reveal rapid evolution by repeat expansion and  
712       diversification. *Proc Natl Acad Sci USA* 101:3286–3291.  
713       <https://doi.org/10.1073/pnas.0305448101>
- 714       Hannoufa A, McNevin JP, Lemieux B, 1993 Epicuticular waxes of *Eceriferum*  
715       mutants of *Arabidopsis thaliana*. *Phytochemistry* 33:851-855.  
716       [https://doi.org/10.1016/0031-9422\(93\)85289-4](https://doi.org/10.1016/0031-9422(93)85289-4)
- 717       Heslop-Harrison JS The angiosperm stigma, 1992 In: Cresti M, Tiezzi A, eds. *Sexual*  
718       *plant reproduction*. Berlin: Springer-Verlag, pp 59-68.  
719       [https://doi.org/10.1007/978-3-642-77677-9\\_6](https://doi.org/10.1007/978-3-642-77677-9_6)
- 720       Heslop-Harrison Y, 1981 Stigma characteristics and angiosperm taxonomy. *Nordic*  
721       *Journal of Botany* 1:401-420.  
722       <https://doi.org/10.1111/j.1756-1051.1981.tb00707.x>
- 723       Heslop-Harrison Y, Shivanna KR, 1977 The receptive surface of the angiosperm  
724       stigma. *Annals of Botany* 41:1233-1258.  
725       <http://aob.oxfordjournals.org/content/41/6/1233.sh...>
- 726       Hu CD, Chinenov Y, Kerppola TK, 2002 Visualization of interactions among bZIP

- 727 and Rel family proteins in living cells using bimolecular fluorescence  
728 complementation. *Mol Cell* 9:789–798.  
729 [https://doi.org/10.1016/S1097-2765\(02\)00496-3](https://doi.org/10.1016/S1097-2765(02)00496-3)
- 730 Hülskamp M, Kopczak SD, Horejsi TF, Kihl BK, Pruitt RE, 1995 Identification  
731 of genes required for pollen-stigma recognition in *Arabidopsis thaliana*. *Plant J*  
732 8:703–714. <https://doi.org/10.1046/j.1365-313X.1995.08050703.x>
- 733 Koomneef M, Hanhart CJ, Thiel F, 1989 A genetic and phenotypic description of  
734 *Eceriferum* (*cer*) mutants in *Arabidopsis thaliana*. *J Hered* 80:118-122.  
735 <https://doi.org/10.1093/oxfordjournals.jhered.a110808>
- 736 Kurata T, Kawabata-Awai C, Sakuradani E, Shimizu S, Okada K, Wada T, 2003 The  
737 YORE–YORE gene regulates multiple aspects of epidermal cell differentiation  
738 in *Arabidopsis*. *Plant J* 36: 55–66.  
739 <https://doi.org/10.1046/j.1365-313X.2003.01854.x>
- 740 Li H, Lin Y, Heath RM, Zhu MX, Yang Z, 1999 Control of pollen tube tip growth by a  
741 Rop GTPase-dependent pathway that leads to tip-localized calcium influx. *Plant*  
742 *Cell* 11:1731–1742. <https://doi.org/10.1105/tpc.11.9.1731>
- 743 Lolle SJ, Hsu W, Pruitt RE, 1998 Genetic analysis of organ fusion in *Arabidopsis*  
744 *thaliana*. *Genetics* 149:607–619. <https://doi.org/10.0000/PMID9611177>
- 745 Mayfield JA, Fiebig A, Johnstone SE, Preuss D, 2001 Gene families from the  
746 *Arabidopsis thaliana* pollen coat proteome. *Science* 292:2482–2485.  
747 <https://doi.org/10.1126/science.1060972>
- 748 Mayfield JA, Preuss D, 2000 Rapid initiation of *Arabidopsis* pollination requires the

749 oleosin-domain protein GRP17. *Nat Cell Biol* 2:128–130.

750 <https://doi.org/10.1038/35000084>

751 Murphy DJ, 2006 The extracellular pollen coat in members of the Brassicaceae:

752 composition, biosynthesis, and functions in pollination. *Protoplasma* 228:31–39.

753 <https://doi.org/10.1007/s00709-006-0163-5>

754 Preuss D, Lemieux B, Yen G, Davis RW, 1993 A conditional sterile mutation

755 eliminates surface components from Arabidopsis pollen and disrupts cell

756 signaling during fertilization. *Genes Dev* 7:974–985.

757 <https://doi.org/10.1101/gad.7.6.974>

758 Pruitt RE, Vielle-Calzada J-P, Ploense SE, Grossniklaus U, Lolle SJ, 2000

759 FIDDLEHEAD, a gene required to suppress epidermal cell interactions in

760 Arabidopsis, encodes a putative lipid biosynthetic enzyme. *Proc Natl Acad Sci*

761 USA 97:1311–1316. <https://doi.org/10.1073/pnas.97.3.1311>

762 Roberts IN, Stead AD, Ockendon DJ, Dickinson HG, 1980 Pollen stigma interactions

763 in Brassica oleracea. *Theoretical and Applied Genetics* 58:241–246.

764 <https://doi.org/10.1007/BF00265173>

765 Scott R, Hodge R, Paul W, Draper J, 1991 The molecular biology of anther

766 differentiation. *Plant Sci* 80:167–191.

767 <https://doi.org/10.1007/s00425-014-2160-9>

768 Swanson R, Clark T, Preuss D, 2005 Expression profiling of Arabidopsis stigma tissue

769 identifies stigma-specific genes. *Sex Plant Reprod* 18:163–171.

770 <https://dx.doi.org/10.1007/s00497-0050009-x>

- 771 Swanson R, Edlund AF, Preuss D, 2004 Species specificity in pollen-pistil  
772 interactions. *Ann Rev Genet* 38:793–818.  
773 <https://doi.org/10.1146/annurev.genet.38.072902.092356>
- 774 Updegraff EP, Zhao F, Preuss D, 2009 The extracellular lipase EXL4 is required for  
775 efficient hydration of Arabidopsis pollen. *Sex Plant Reprod* 22:197–204.  
776 <https://doi.org/10.1007/s00497-009-0104-5>
- 777 Upton C, Buckley JT, 1995 A new family of lipolytic enzymes? *Trends Biochem Sci*  
778 20:178–179. <http://linkinghub.elsevier.com/retrieve/pii/S0968000400890027>
- 779 Zhang ZB, Zhu J, Gao JF, Wang C, Li H *et al.*, 2007 Transcription factor  
780 AtMYB103 is required for anther development by regulating tapetum  
781 development, callose dissolution and exine formation in Arabidopsis. *Plant J*  
782 52:528–538. <https://doi.org/10.1111/j.1365-313X.2007.03254.x>
- 783 Zinkl GM, Preuss D, 2000 Dissecting Arabidopsis pollen–stigma interactions reveals  
784 novel mechanisms that confer mating specificity. *Annals of Botany*  
785 85(suppl\_1):15–21. <https://doi.org/10.1006/anbo.1999.1066>

A

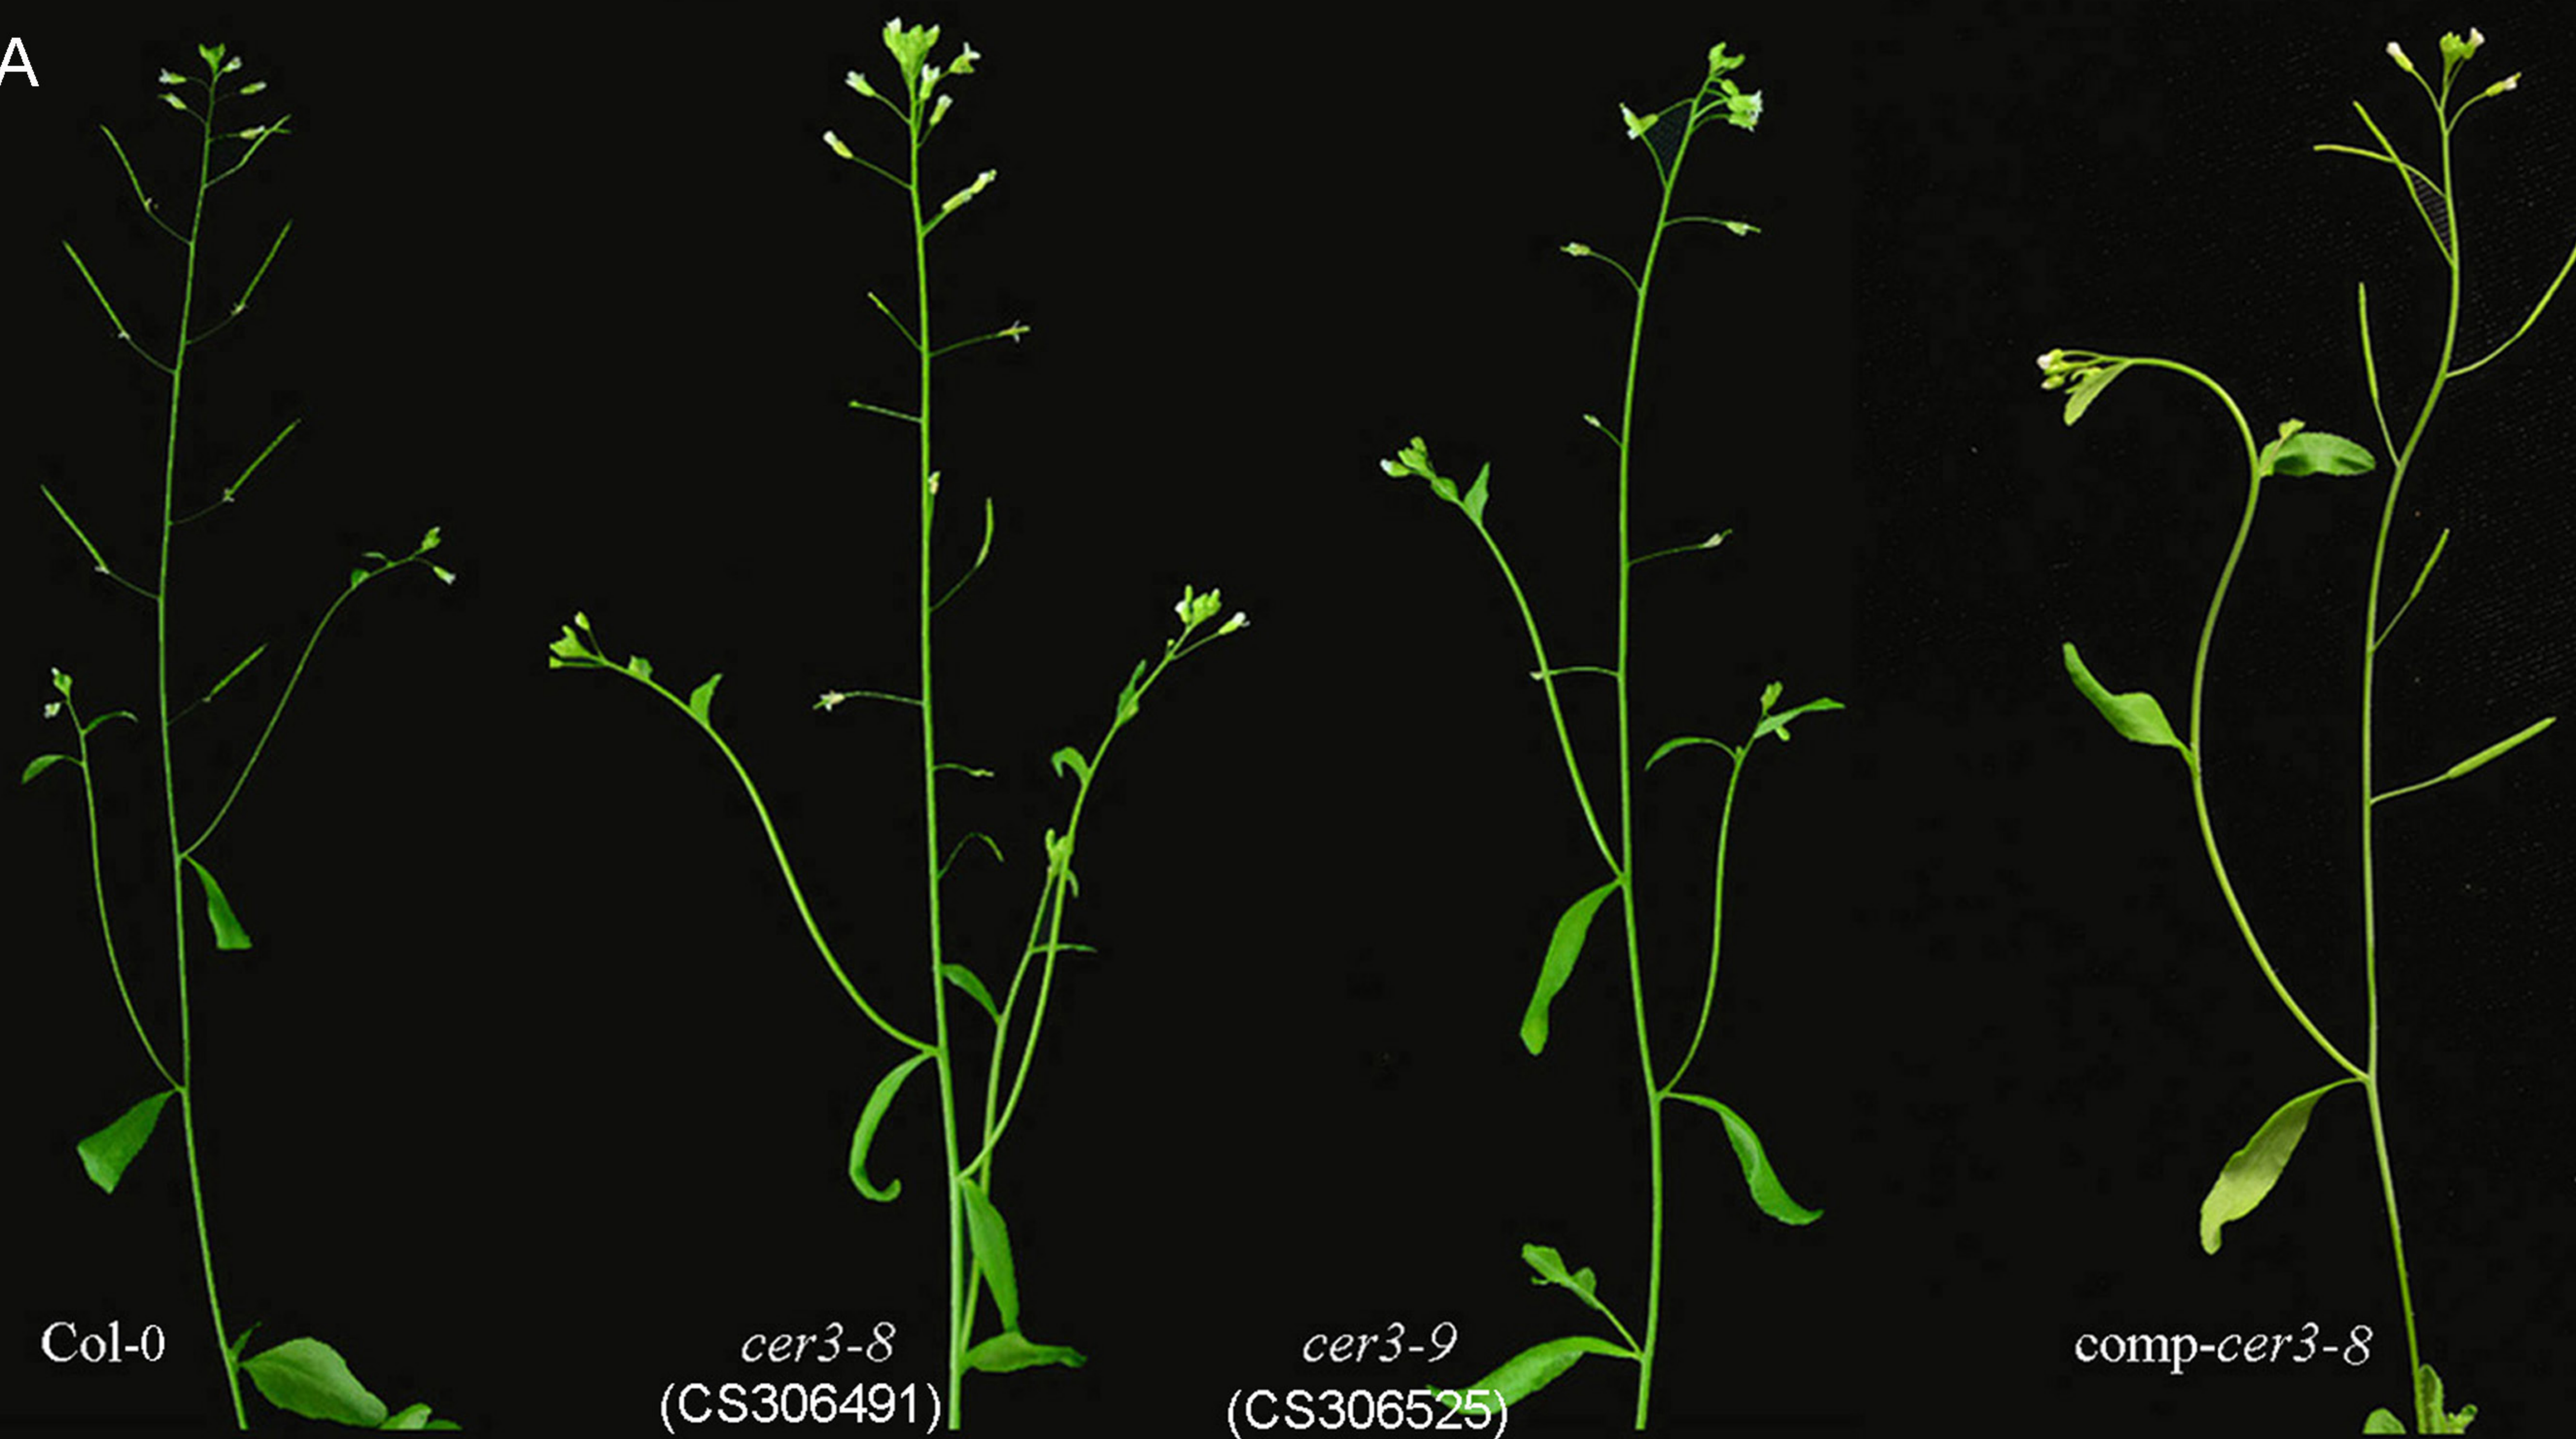

B

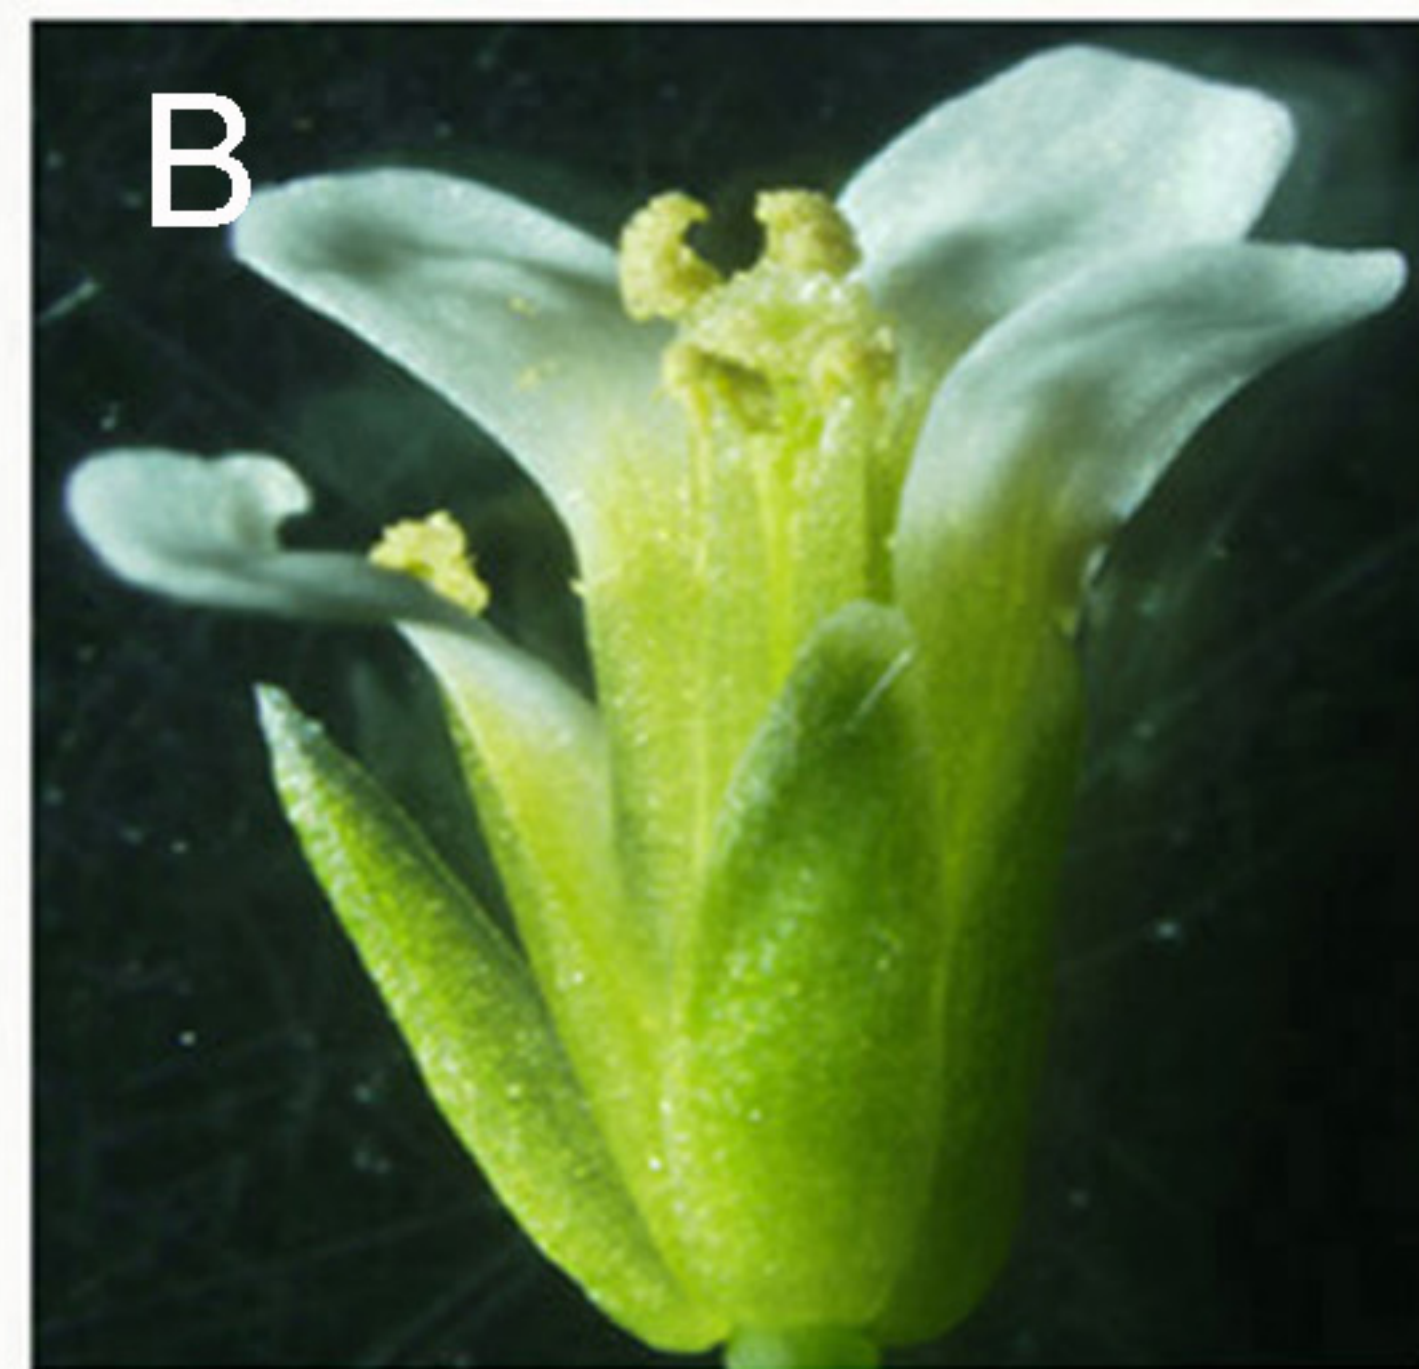

C

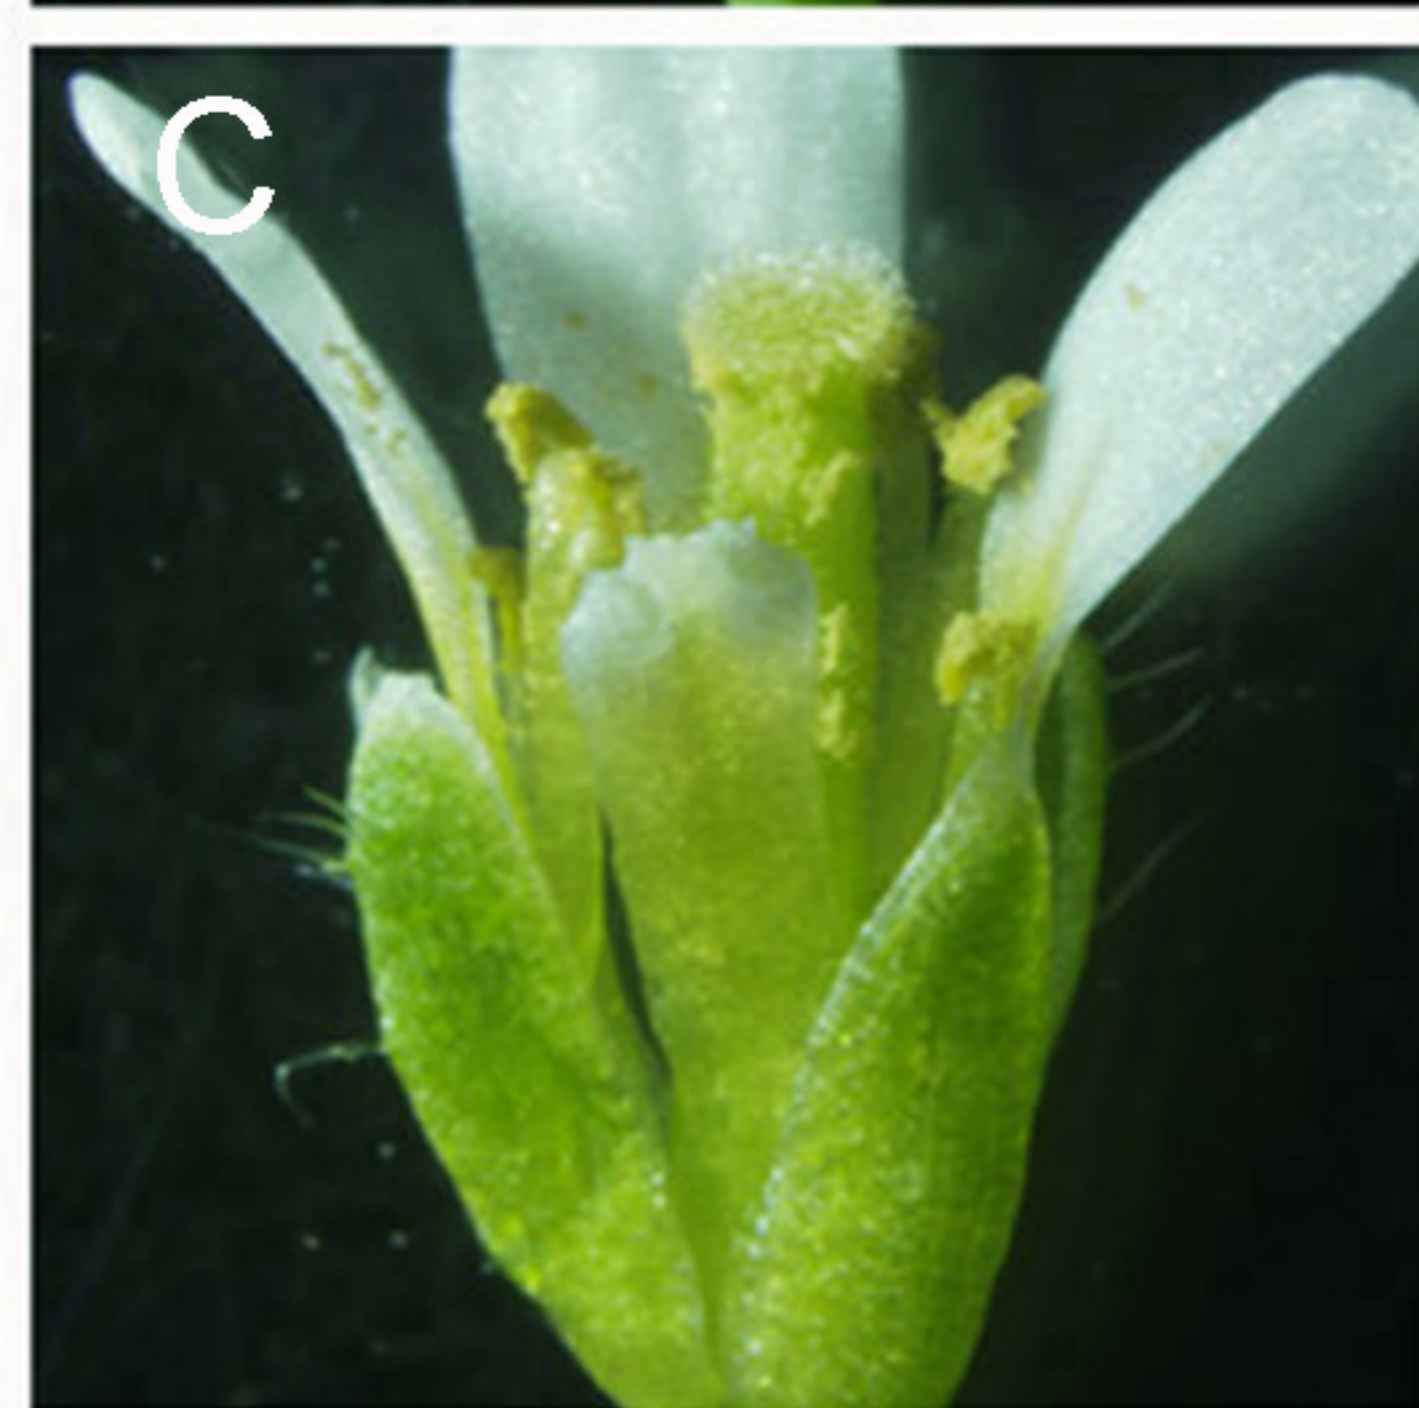

D

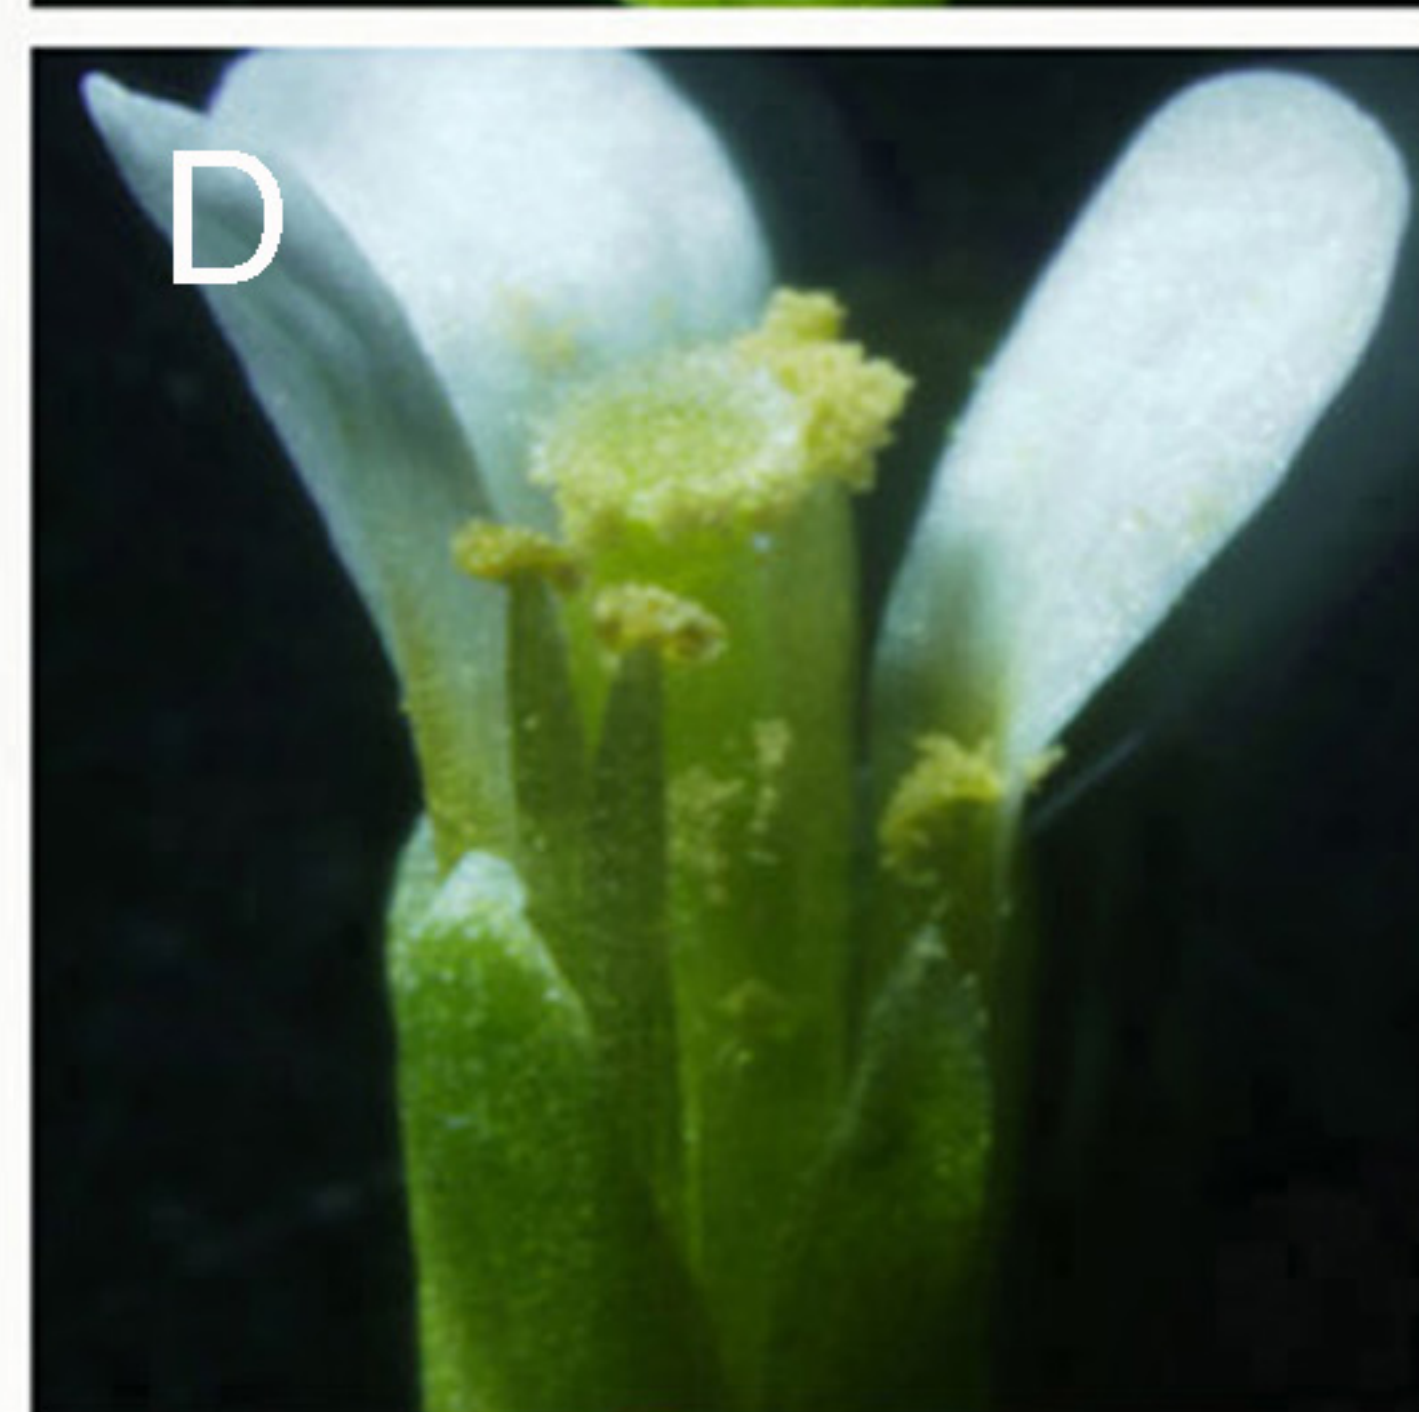

E

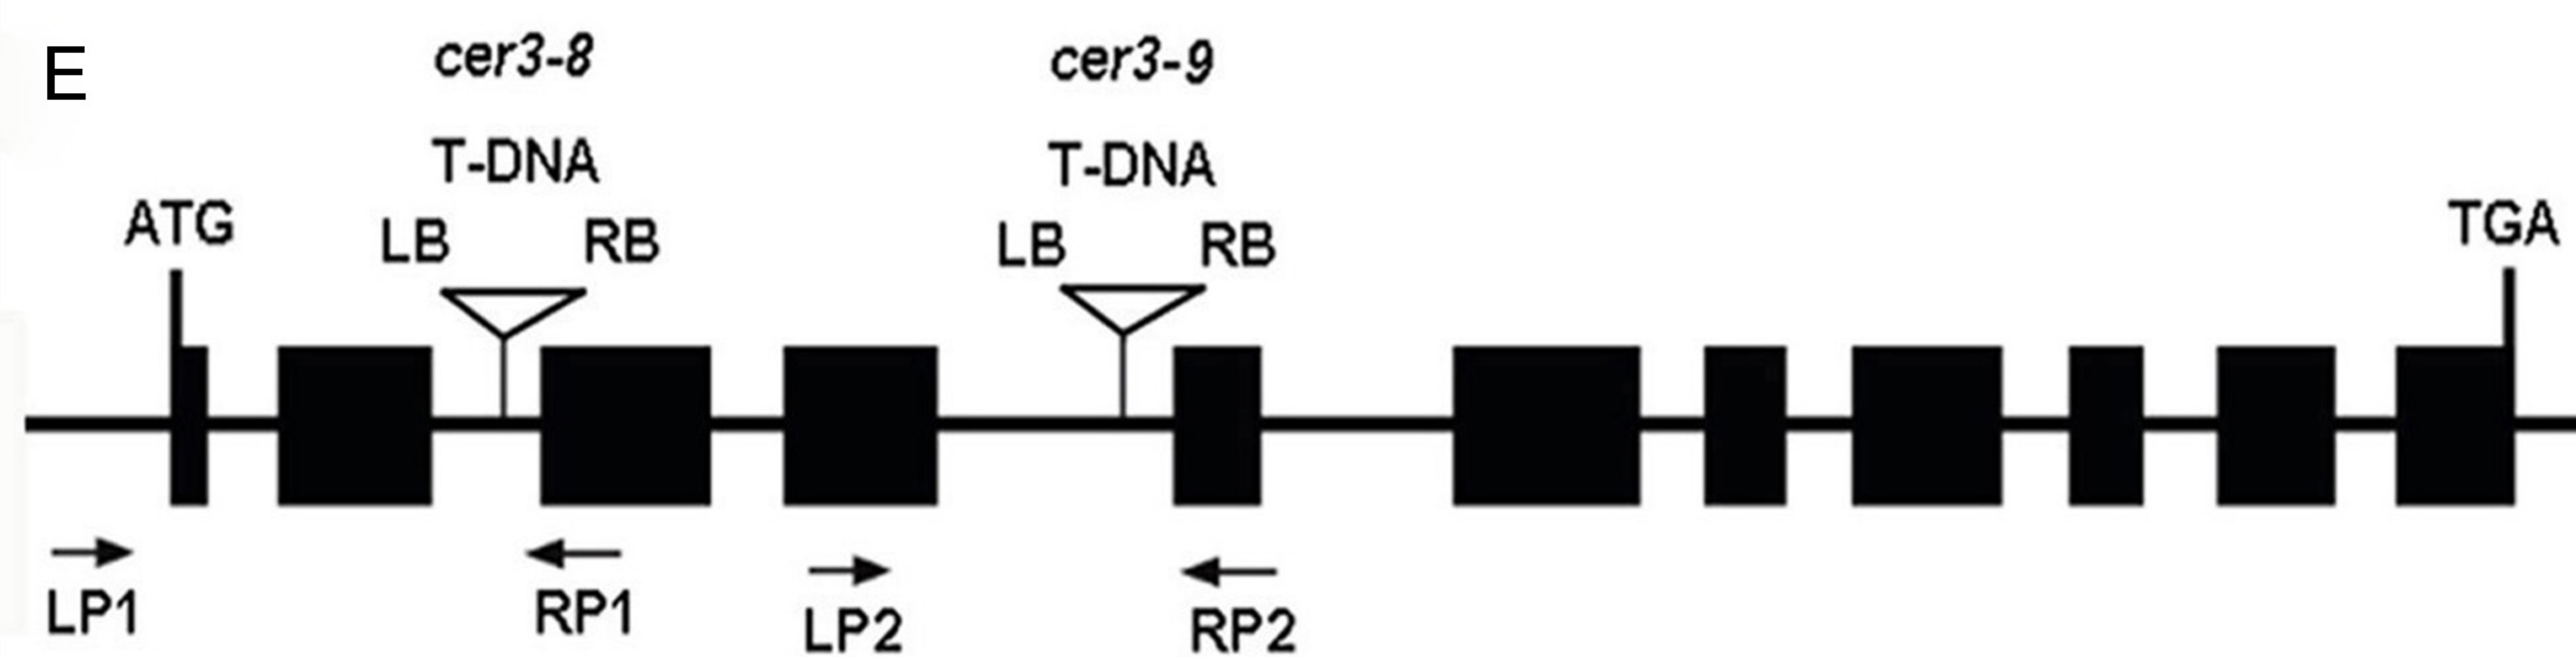

F

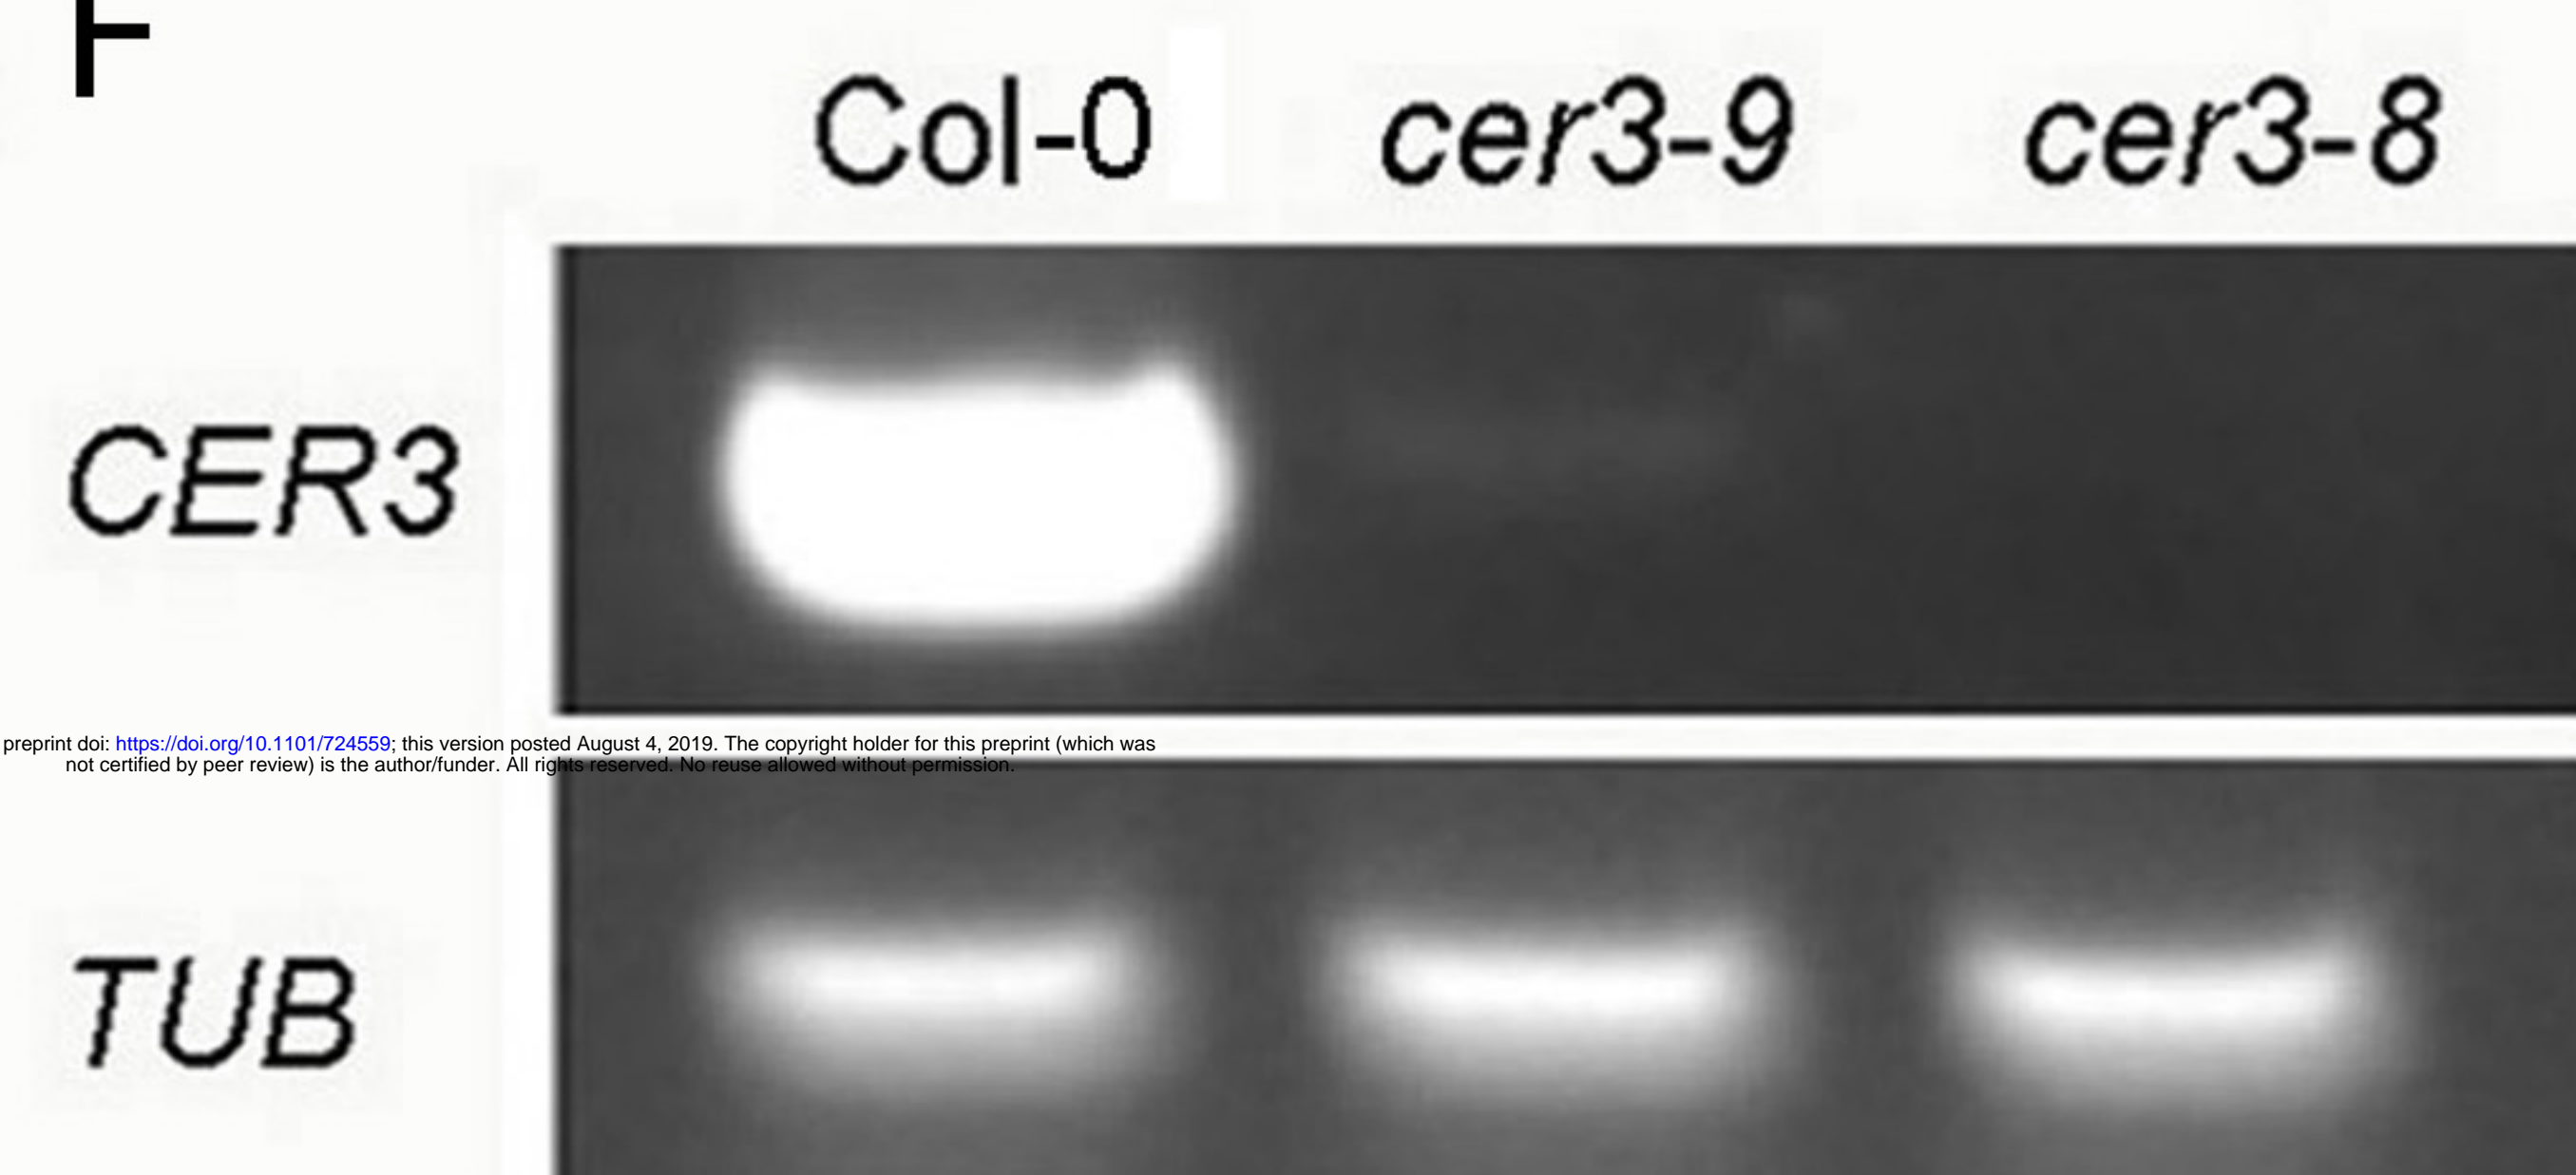

G

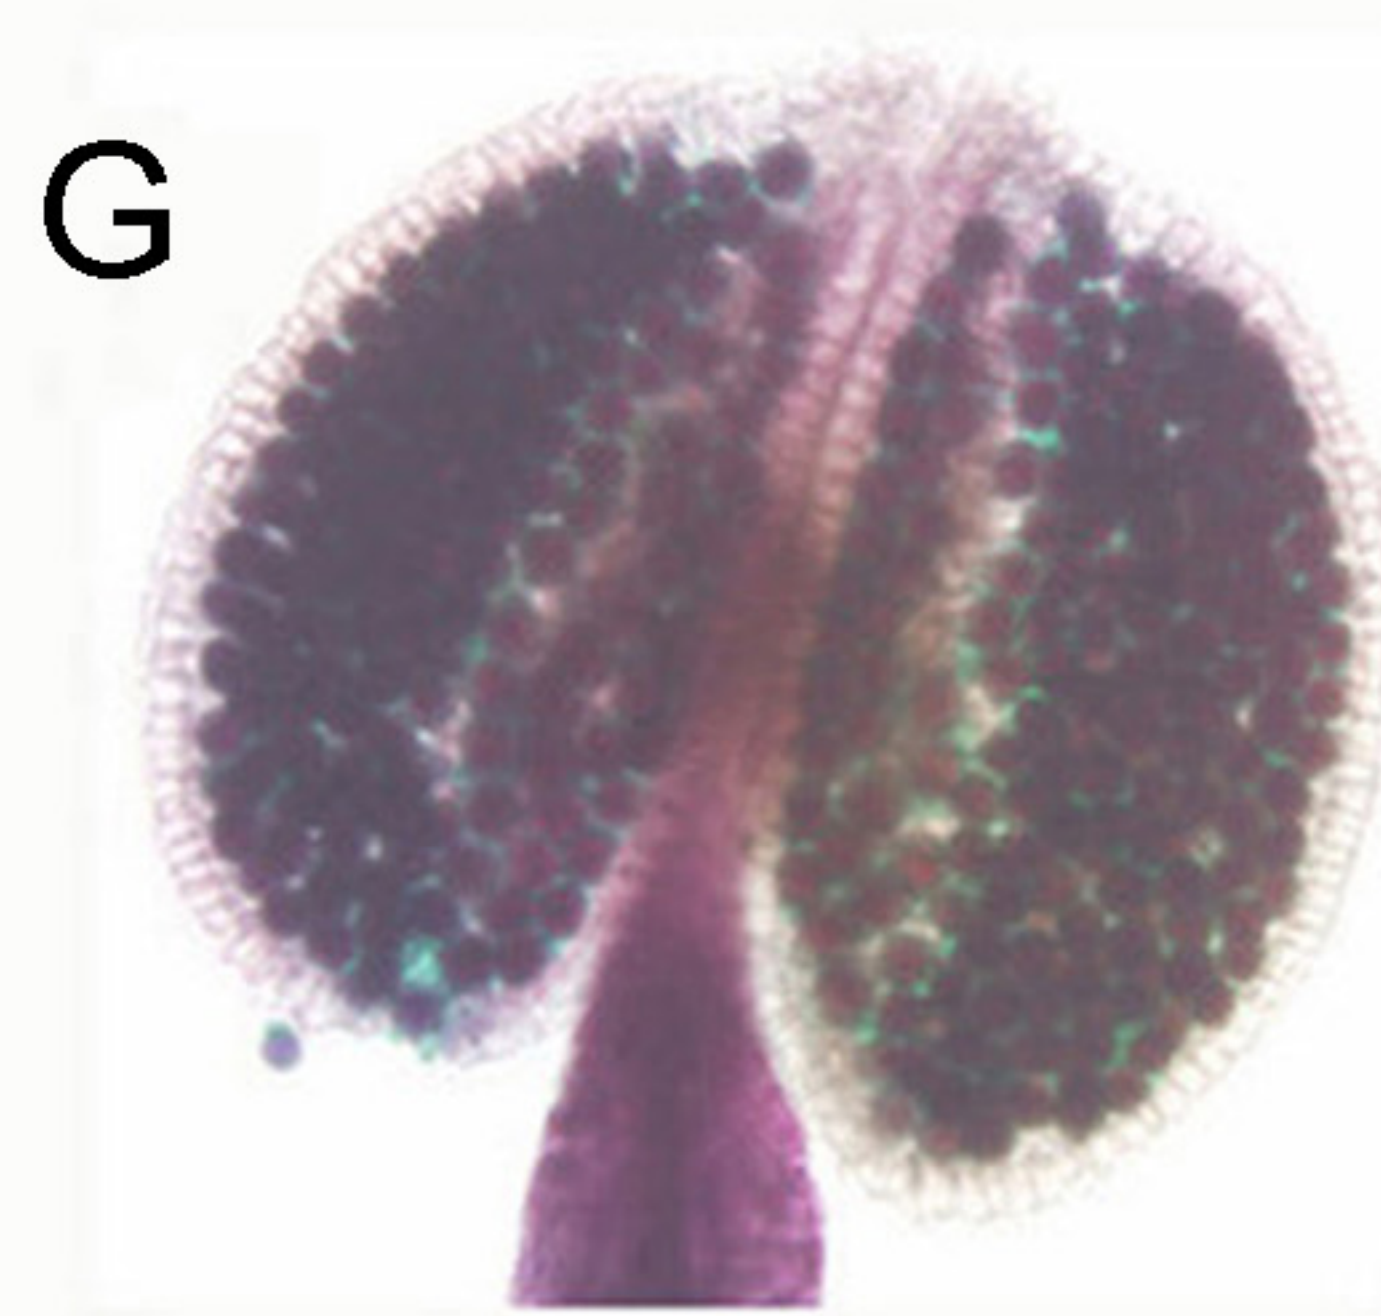

H

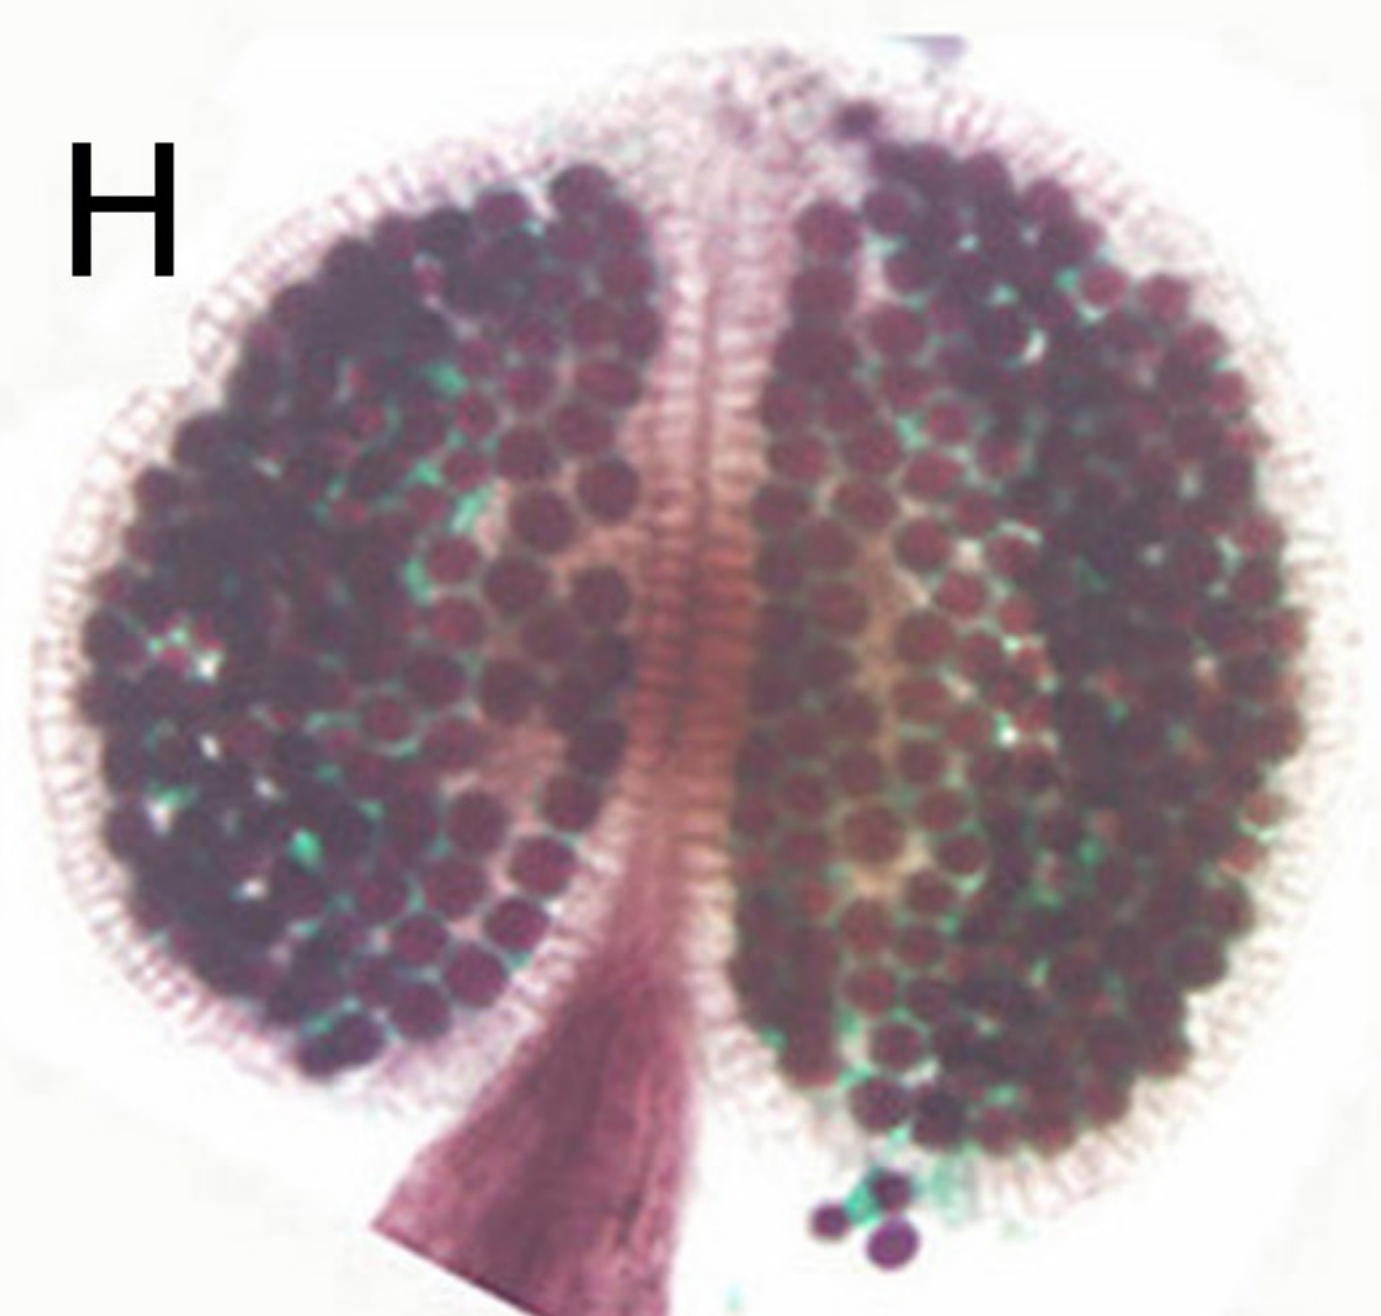

I

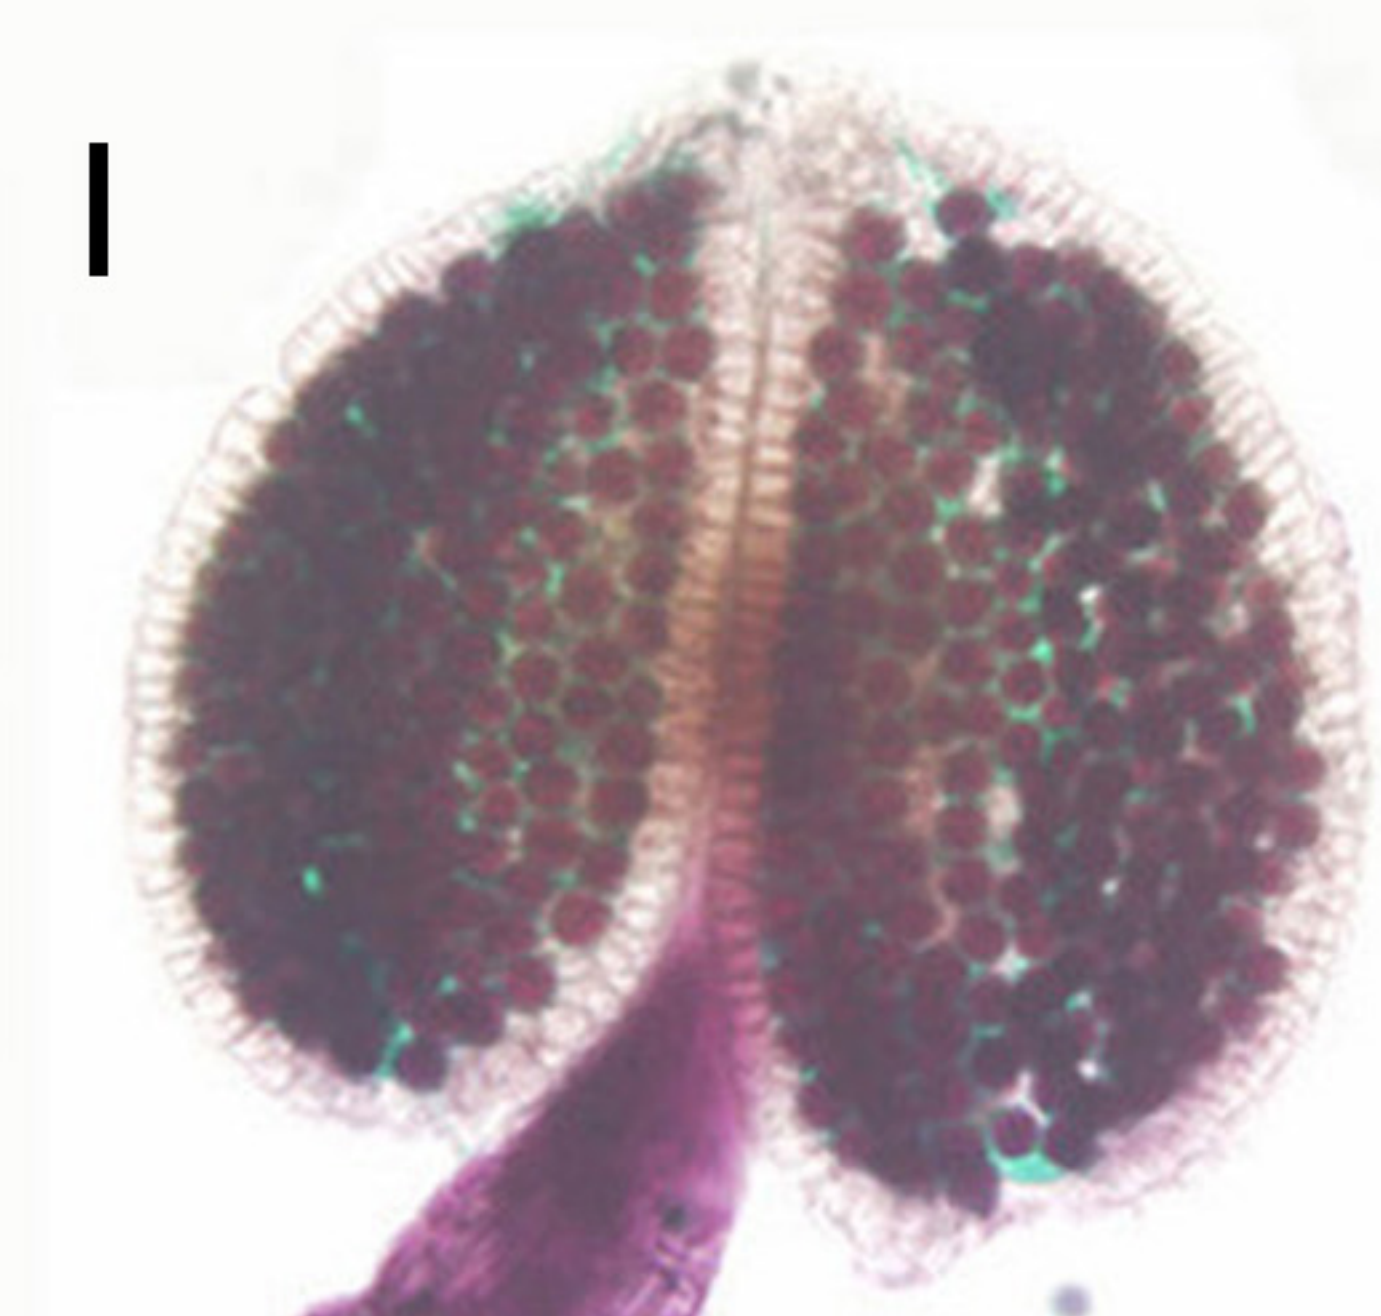

J

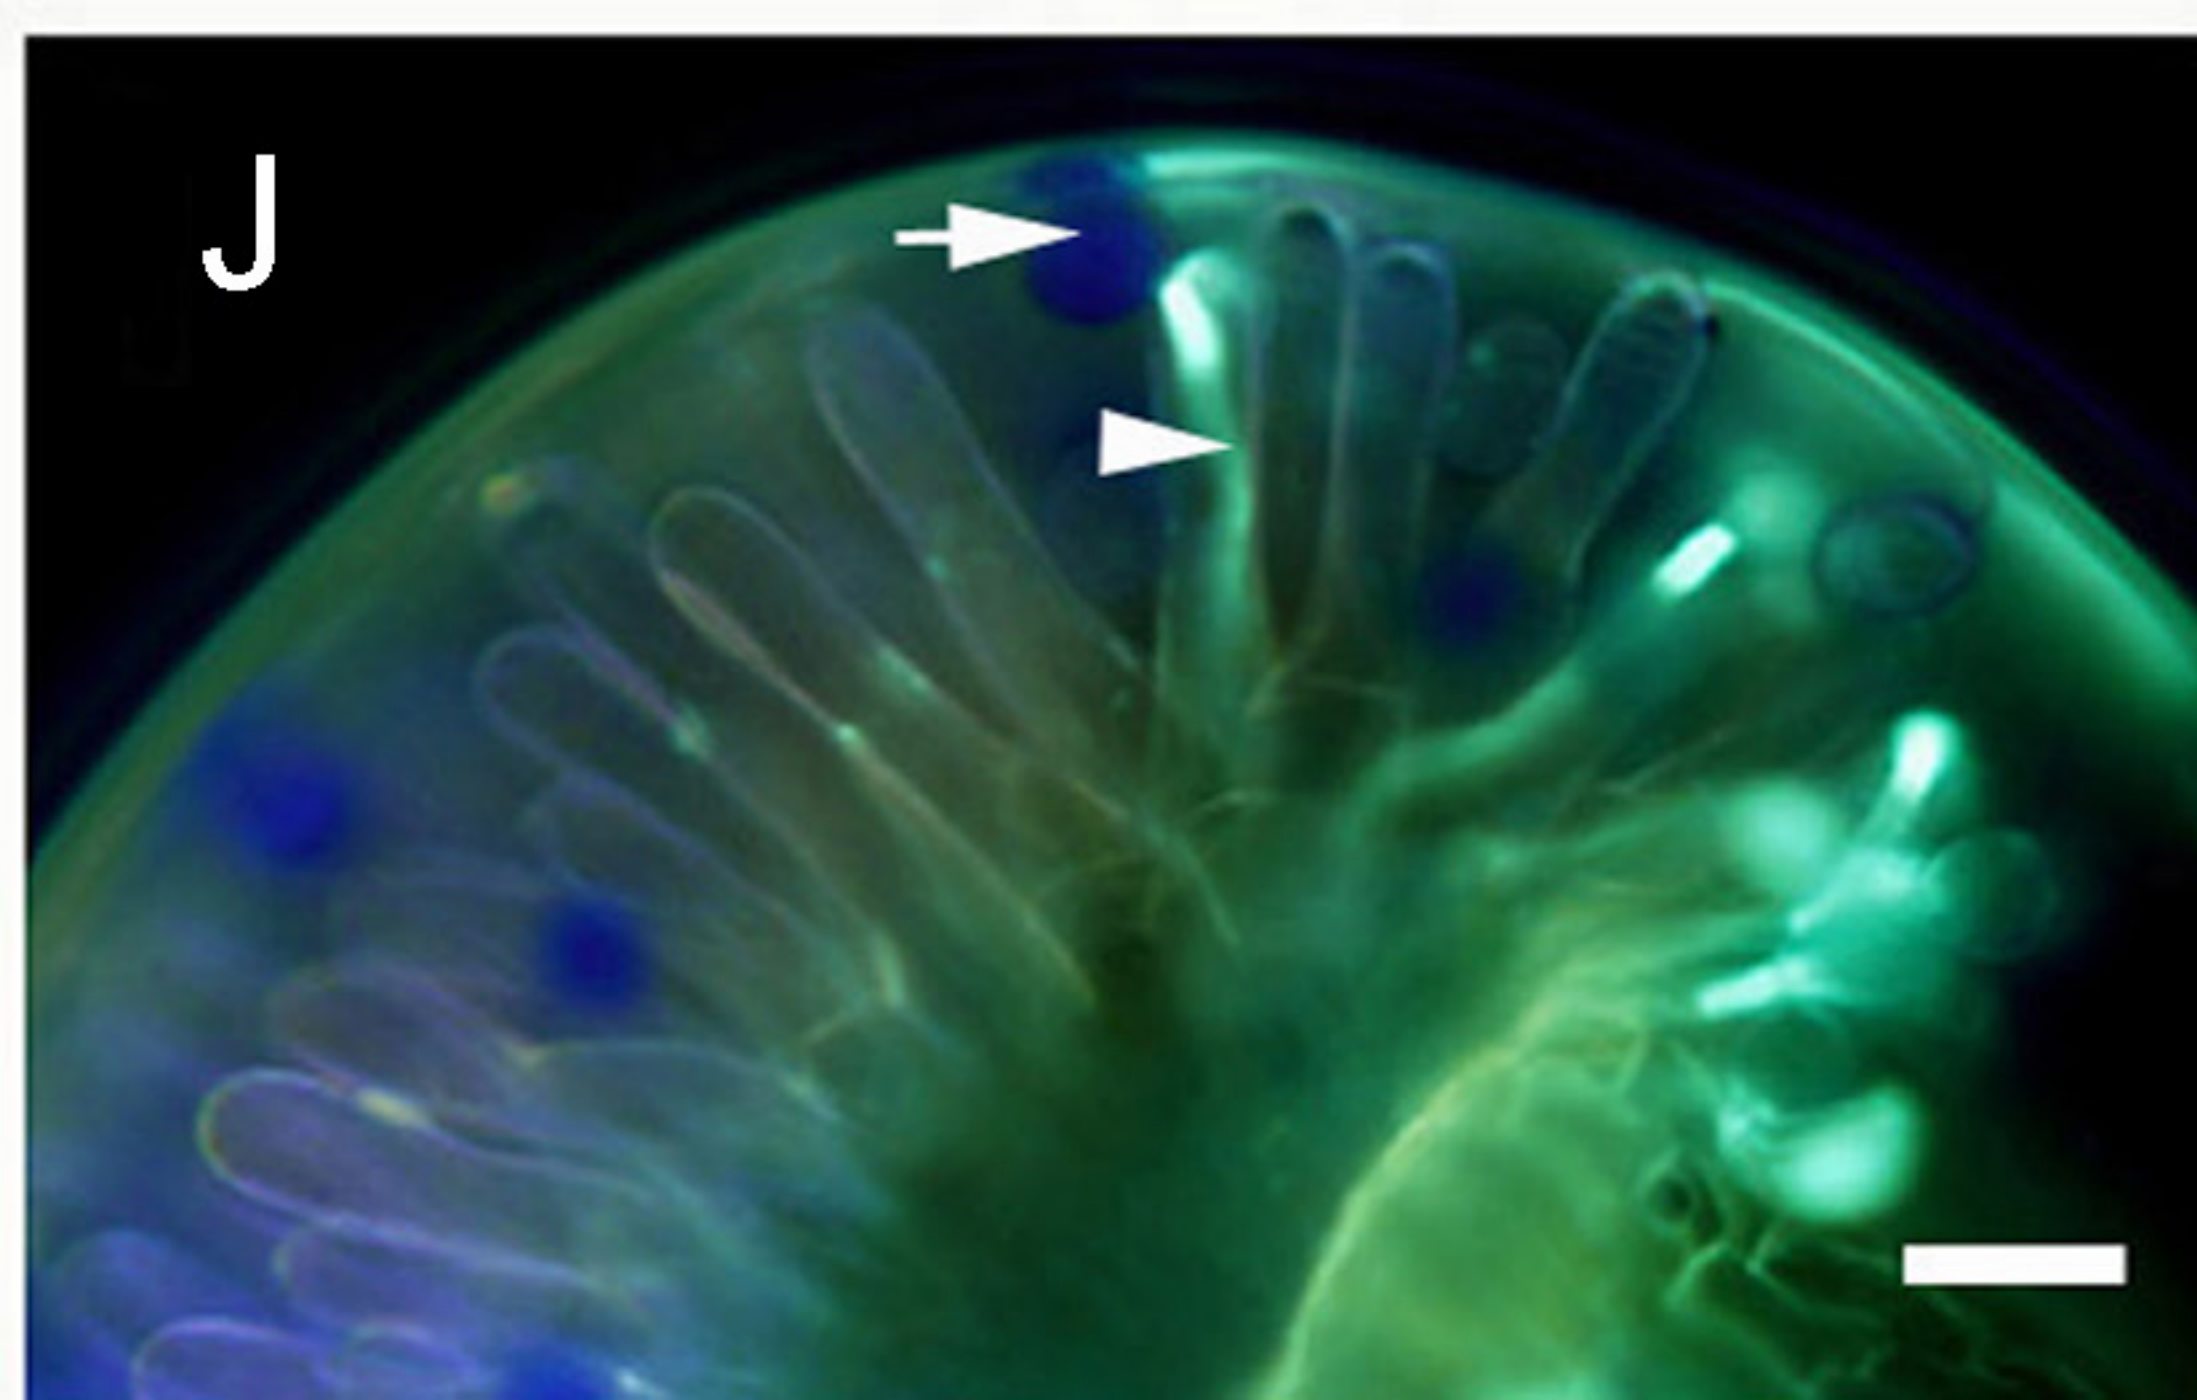

K

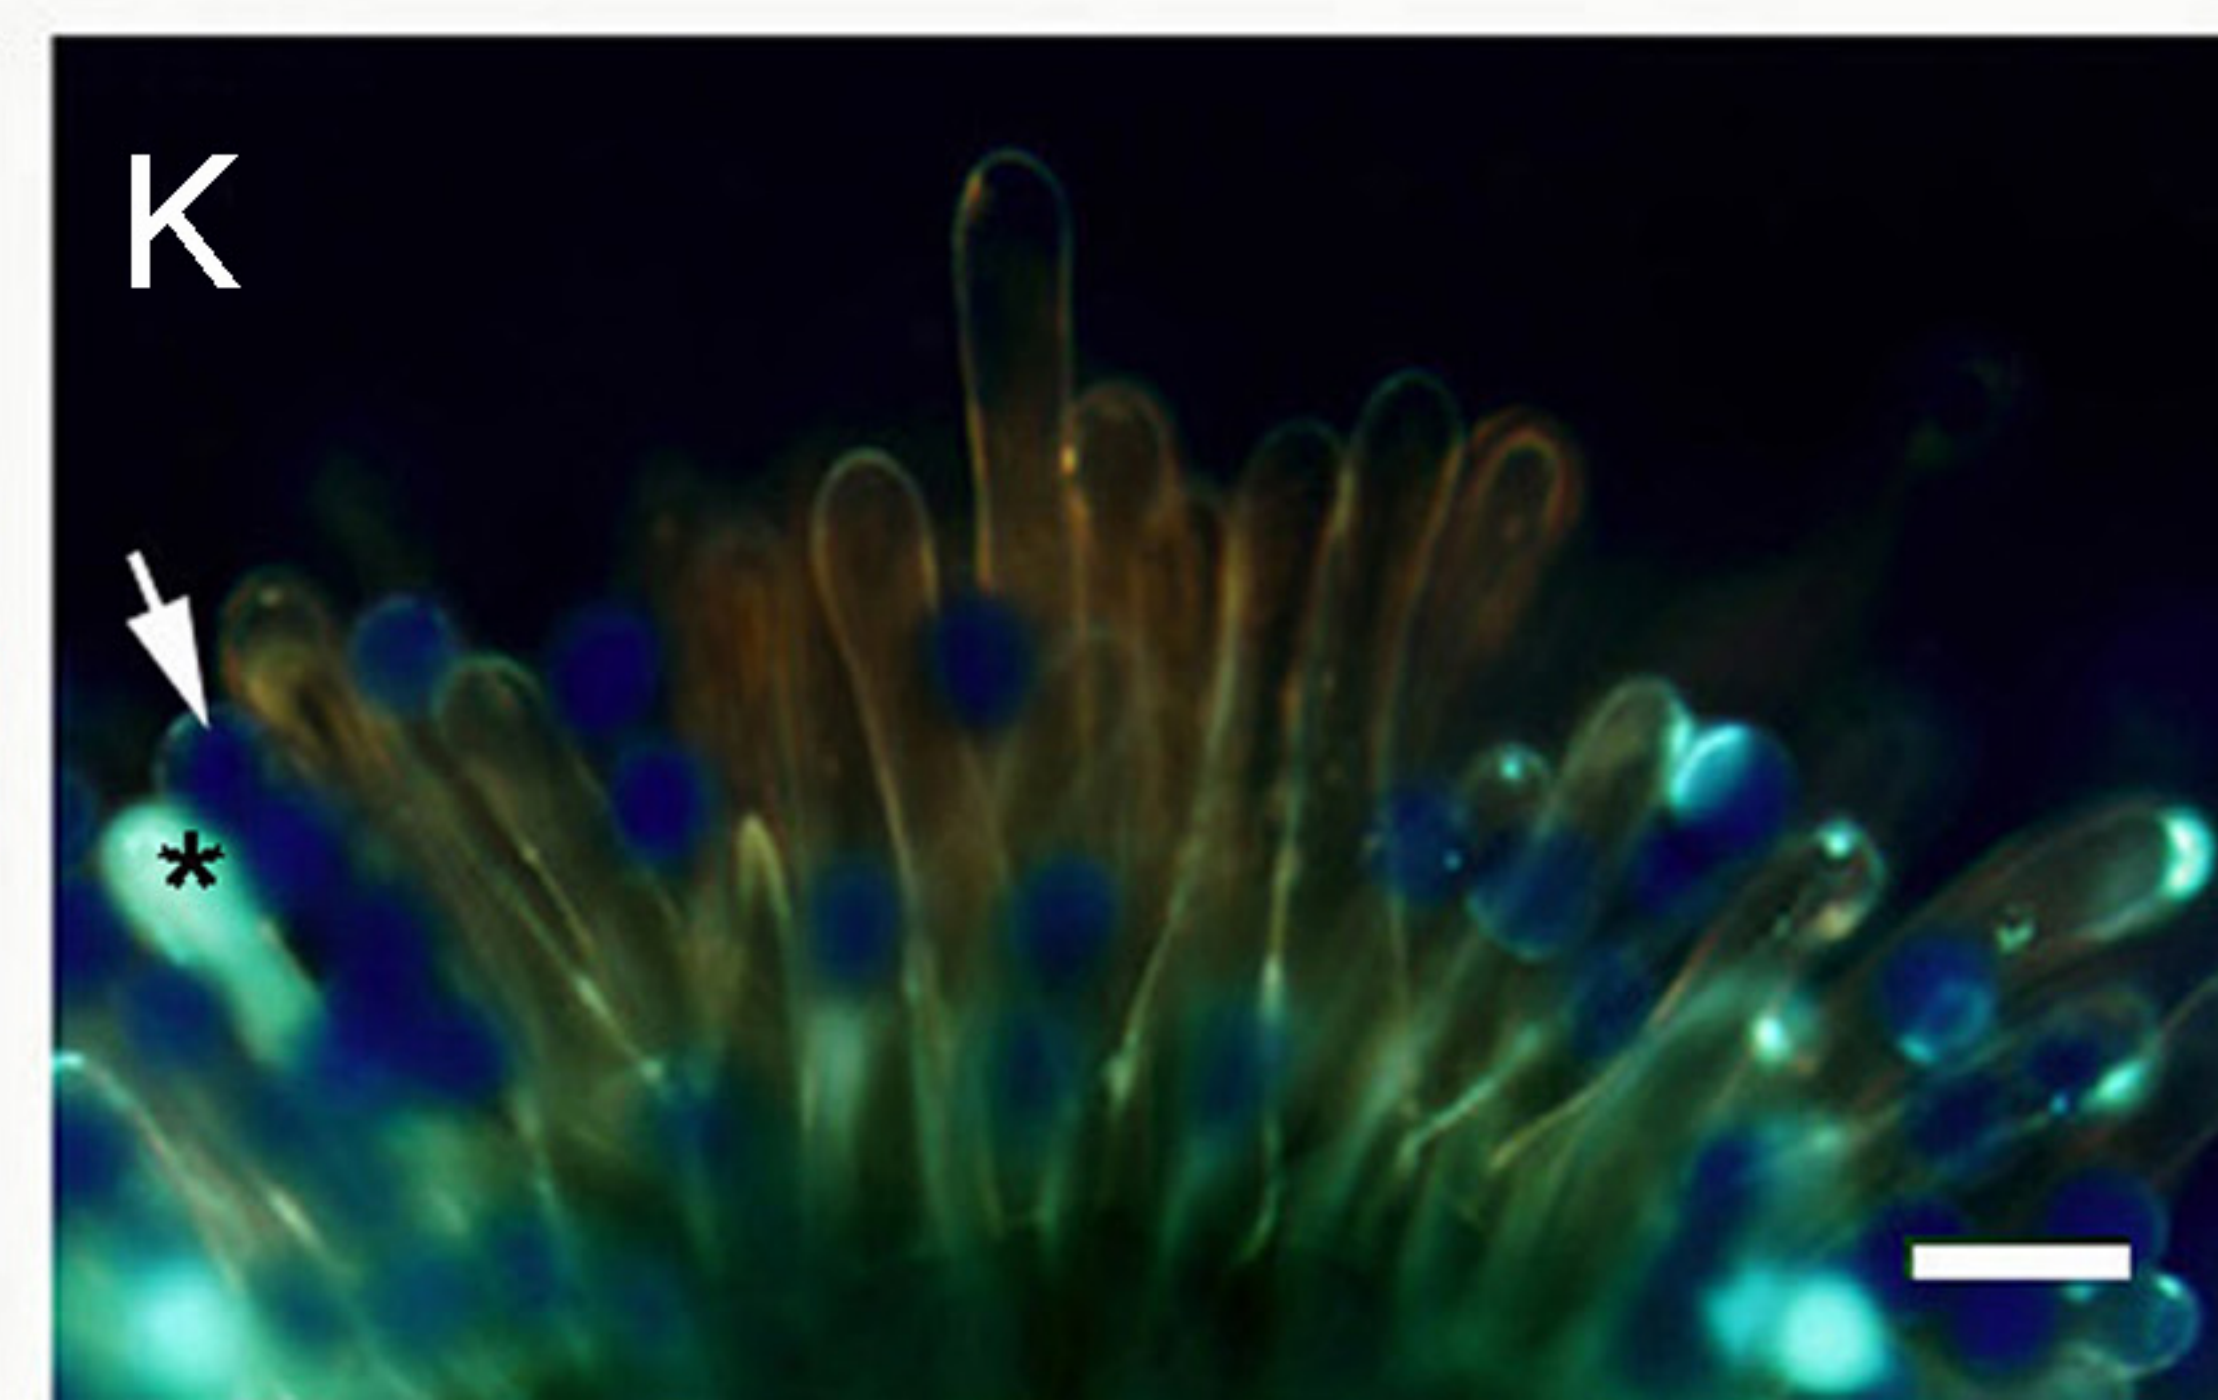

L

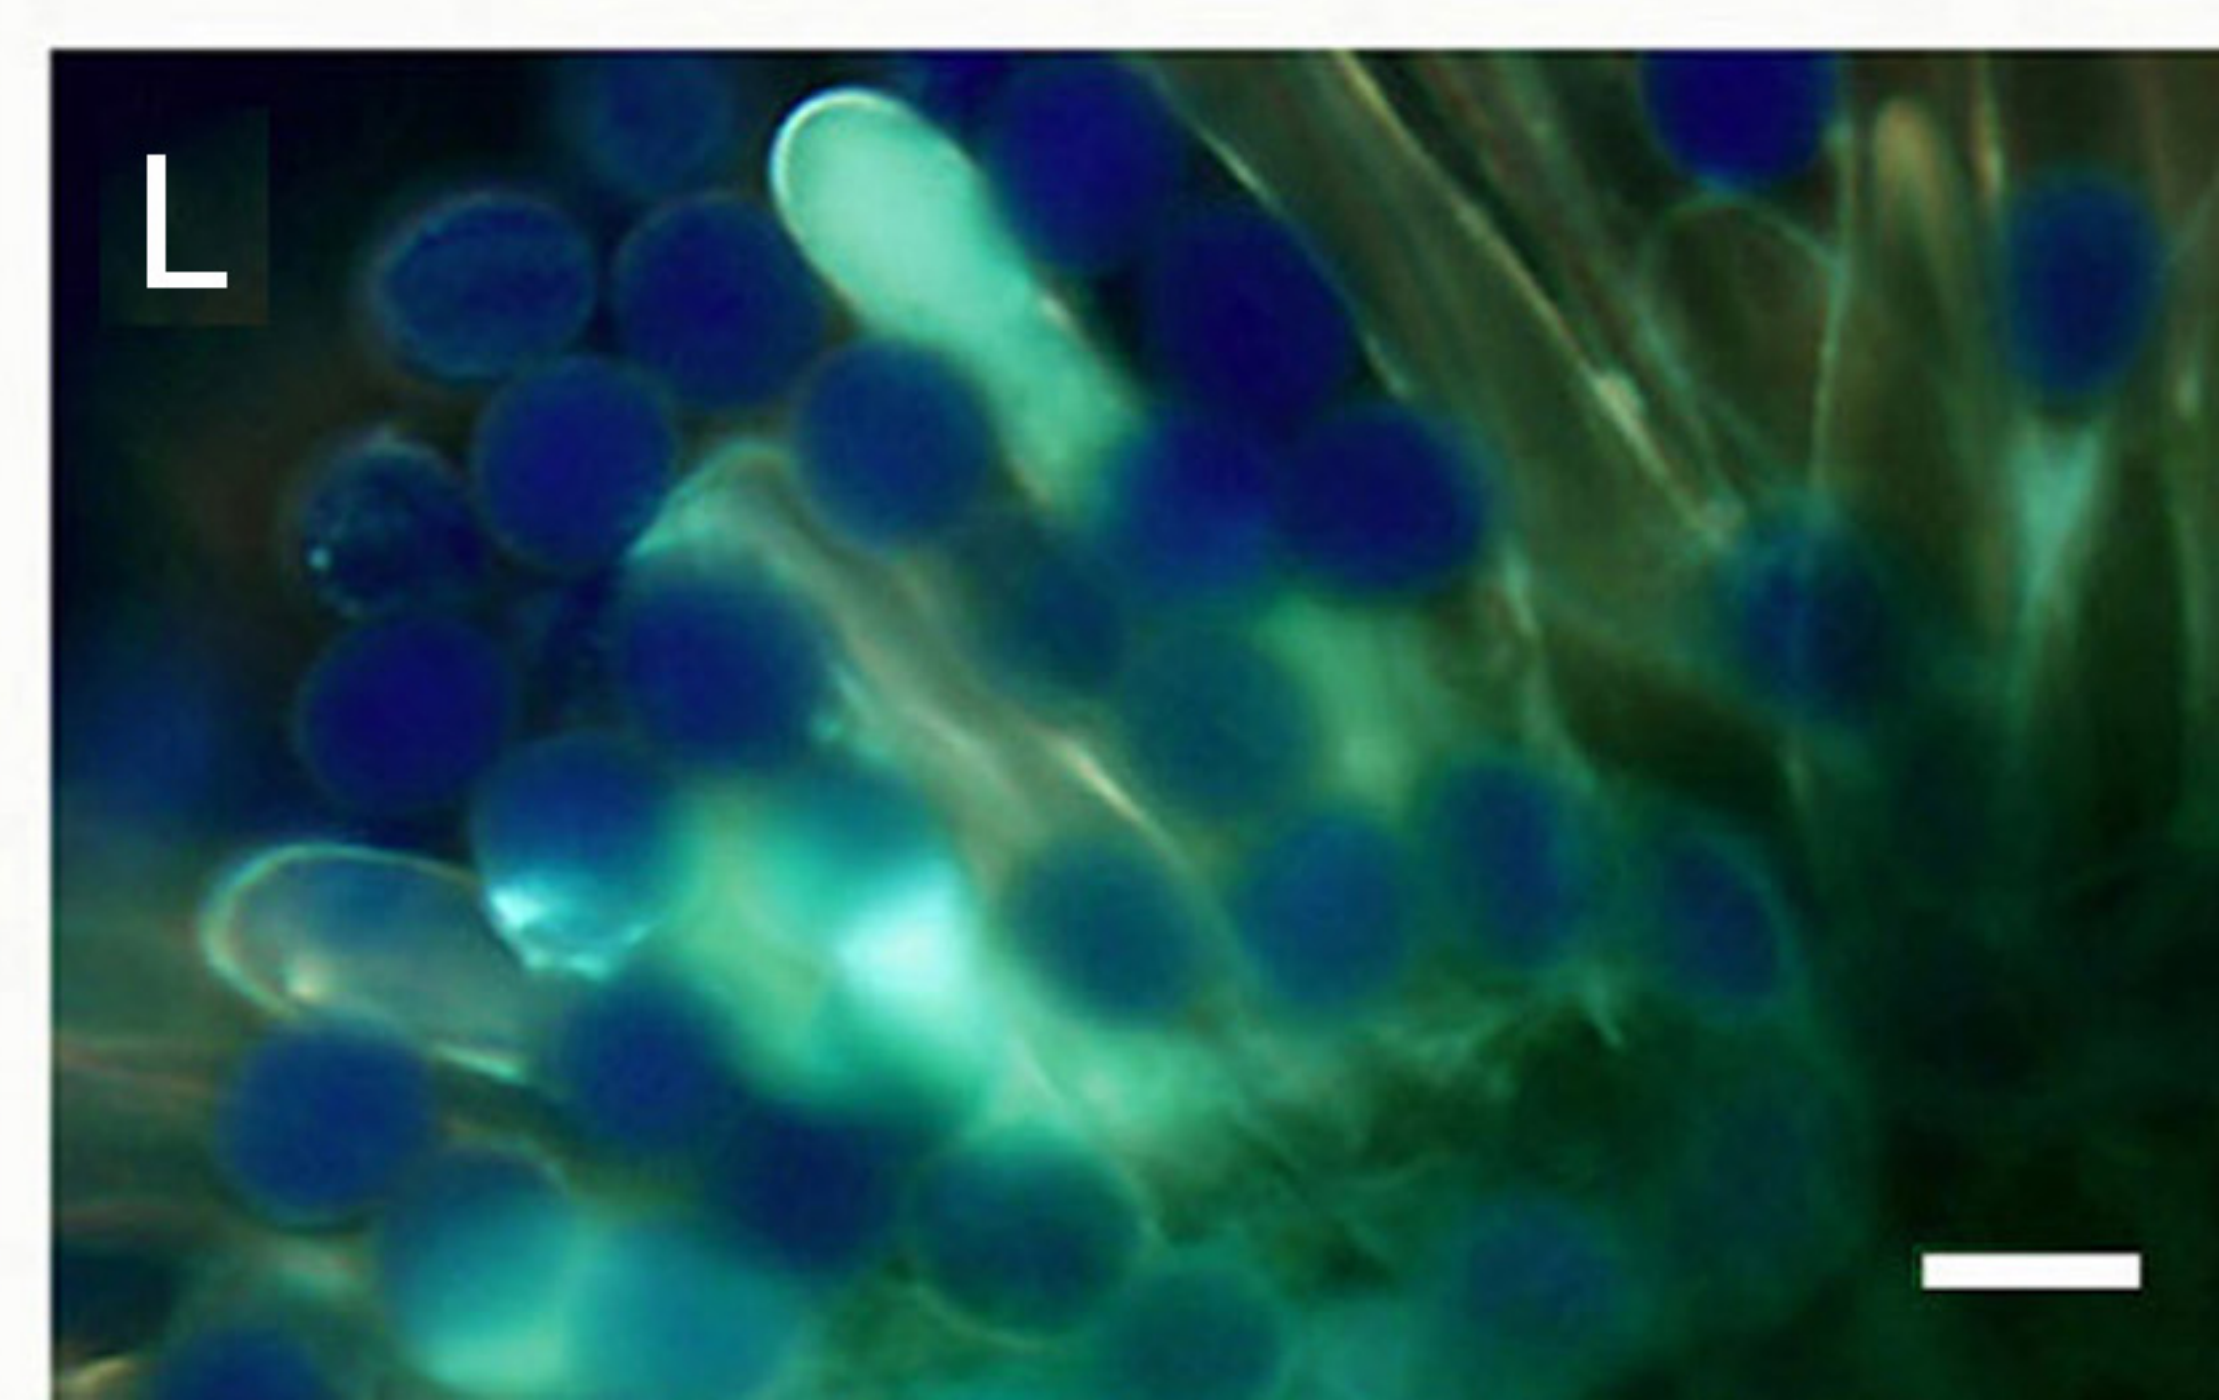

M

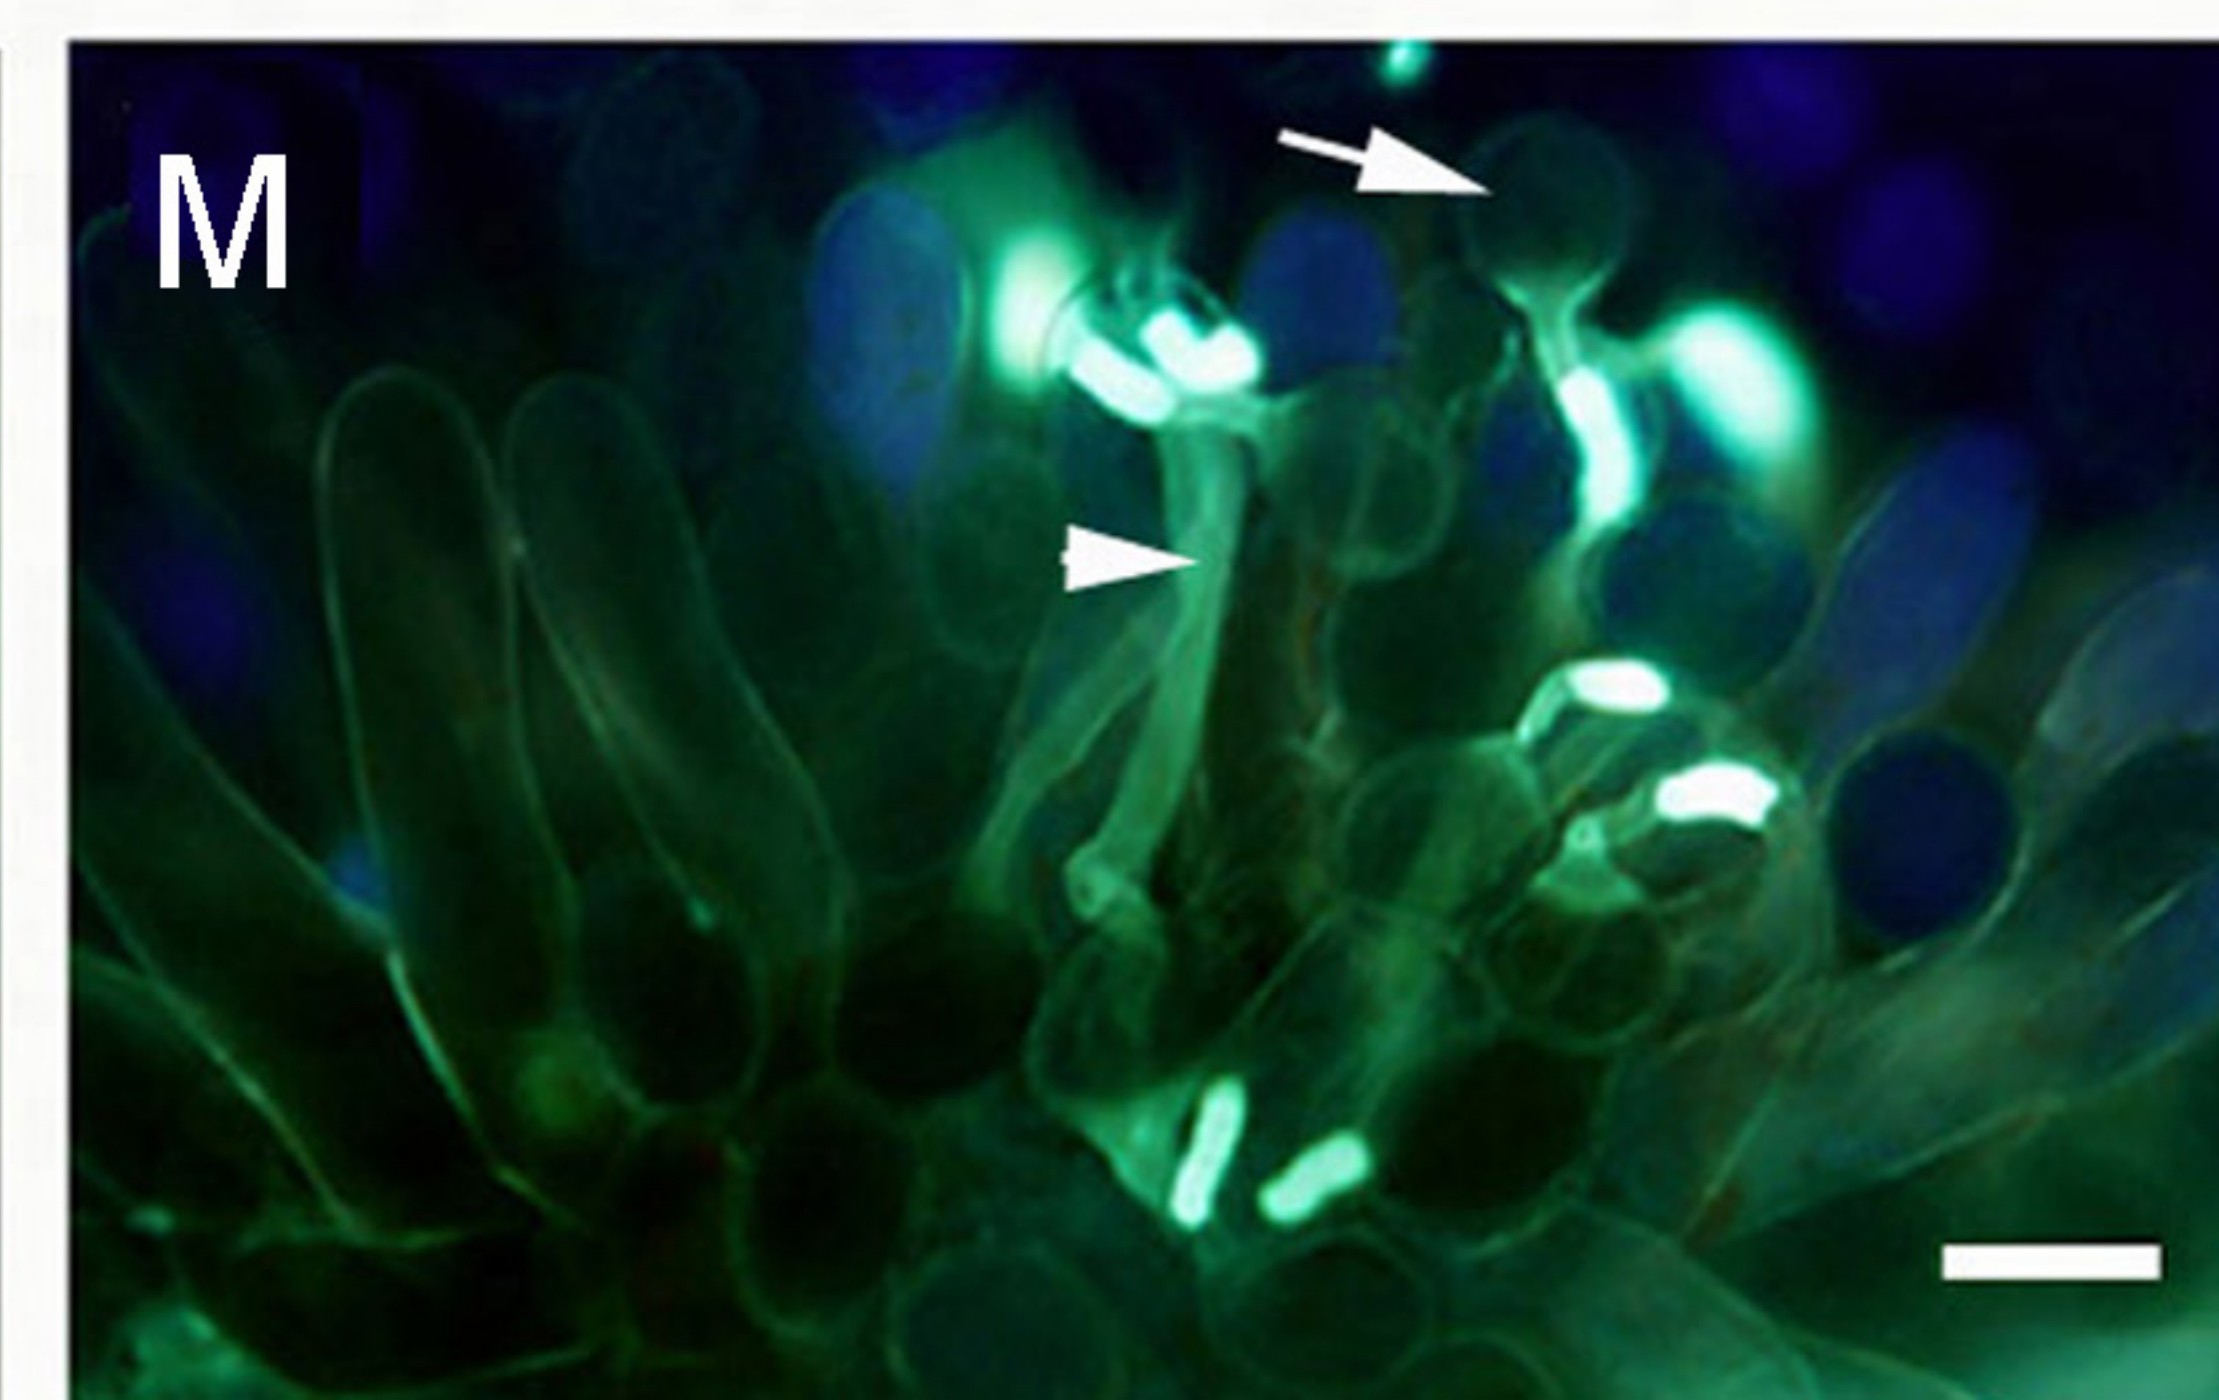

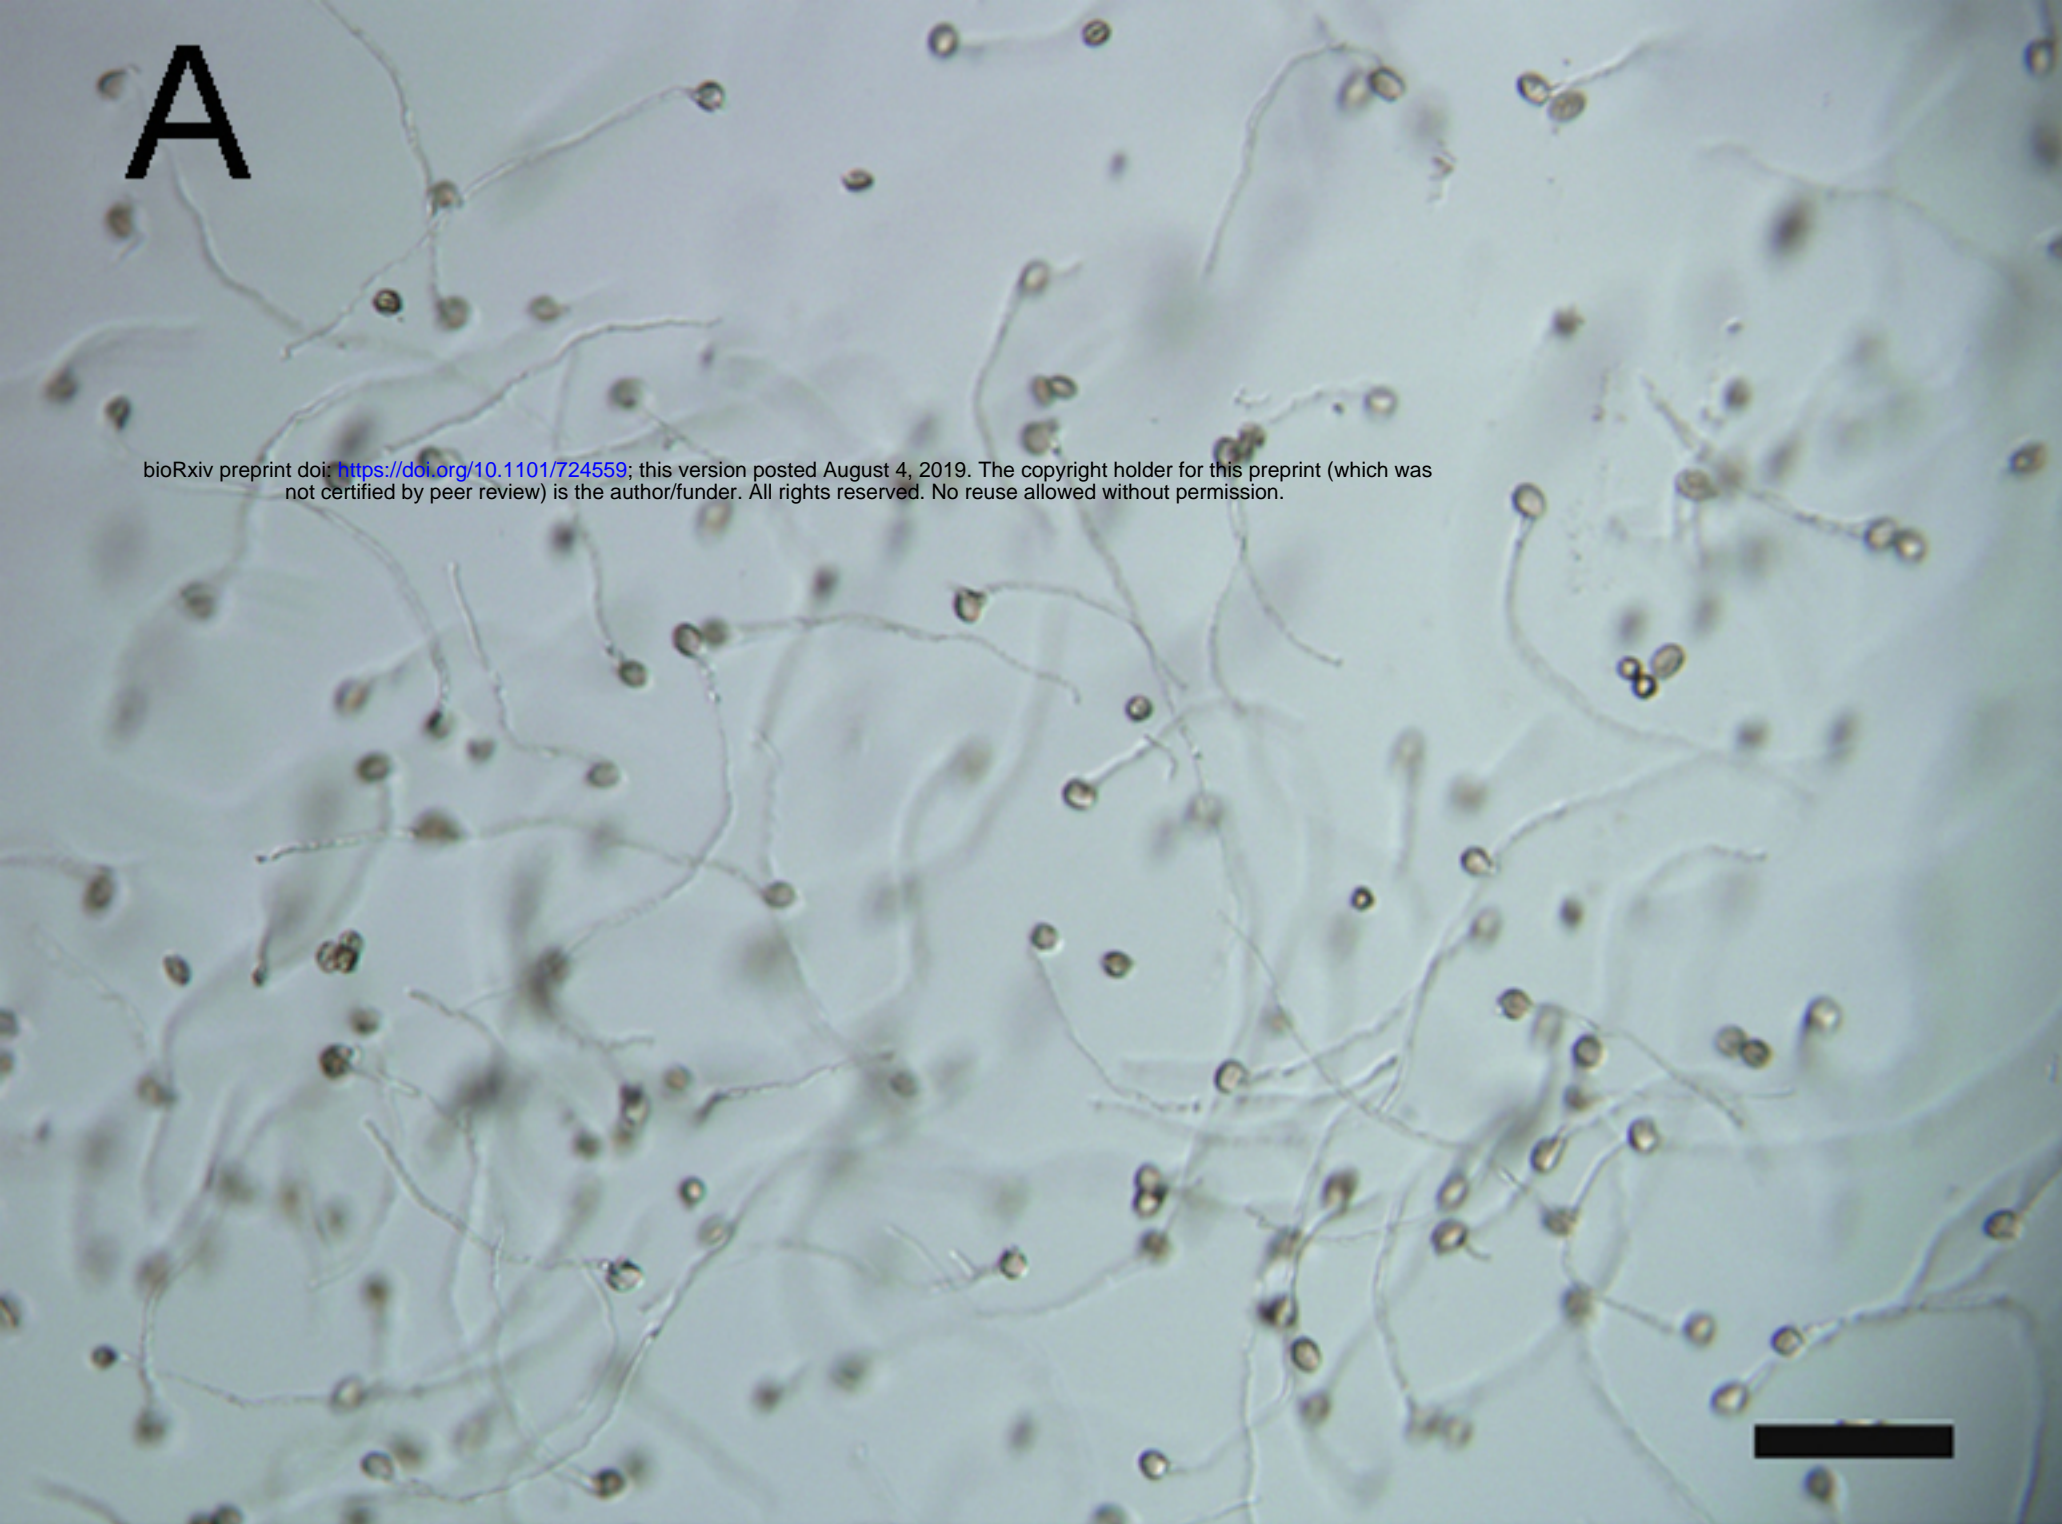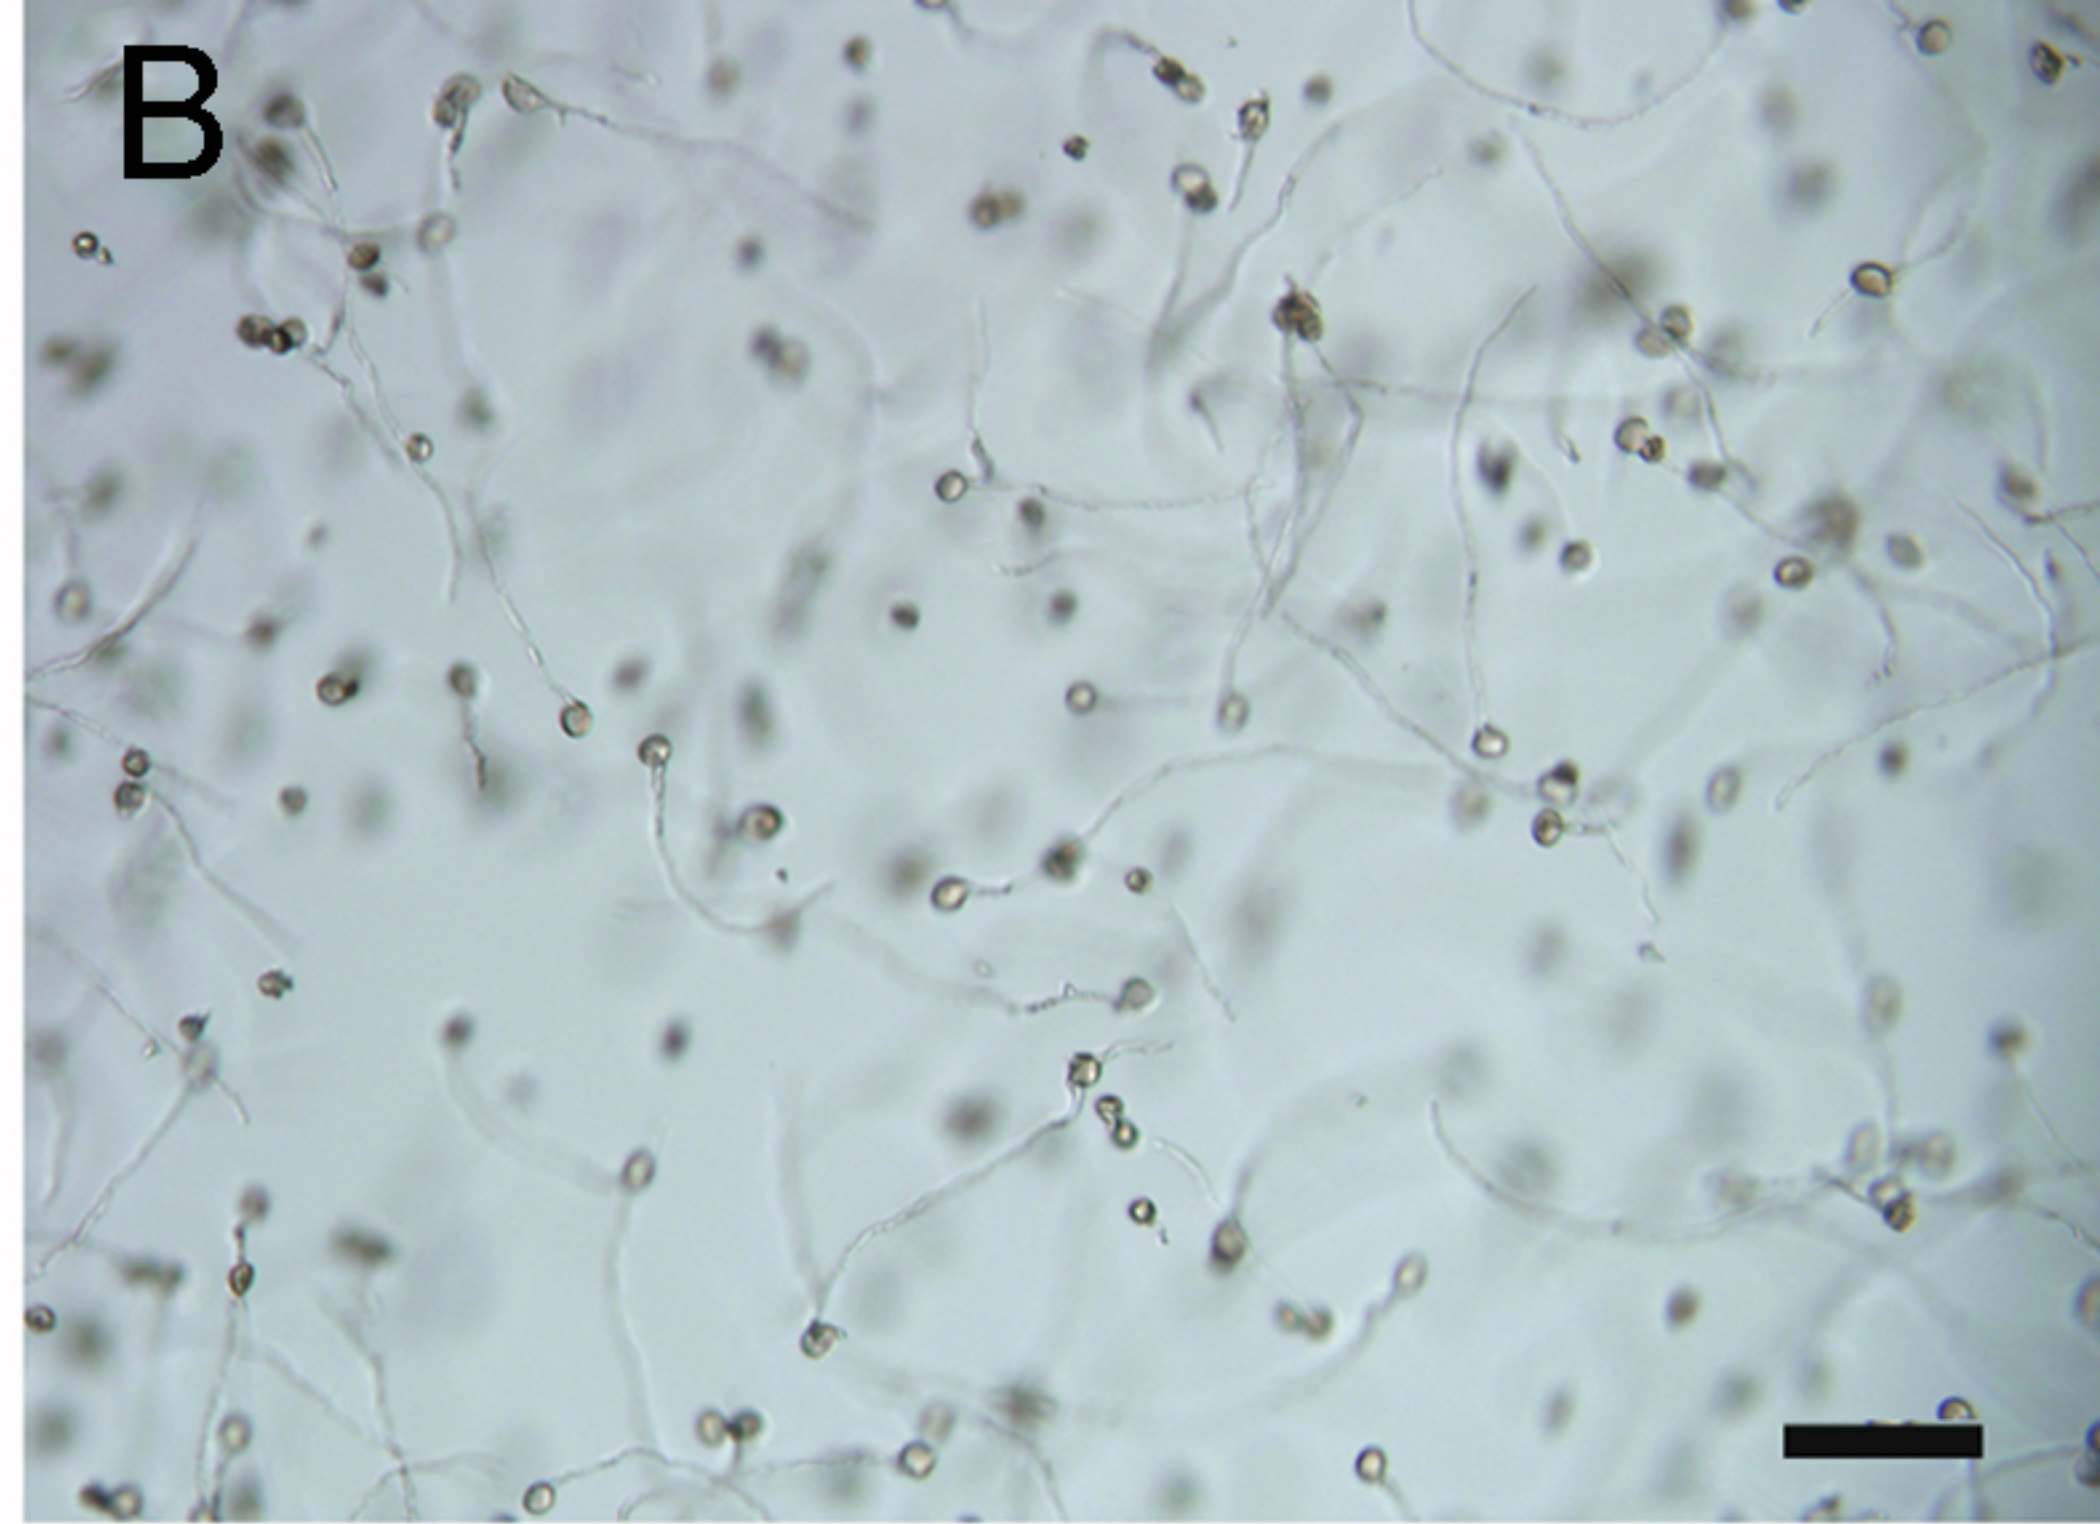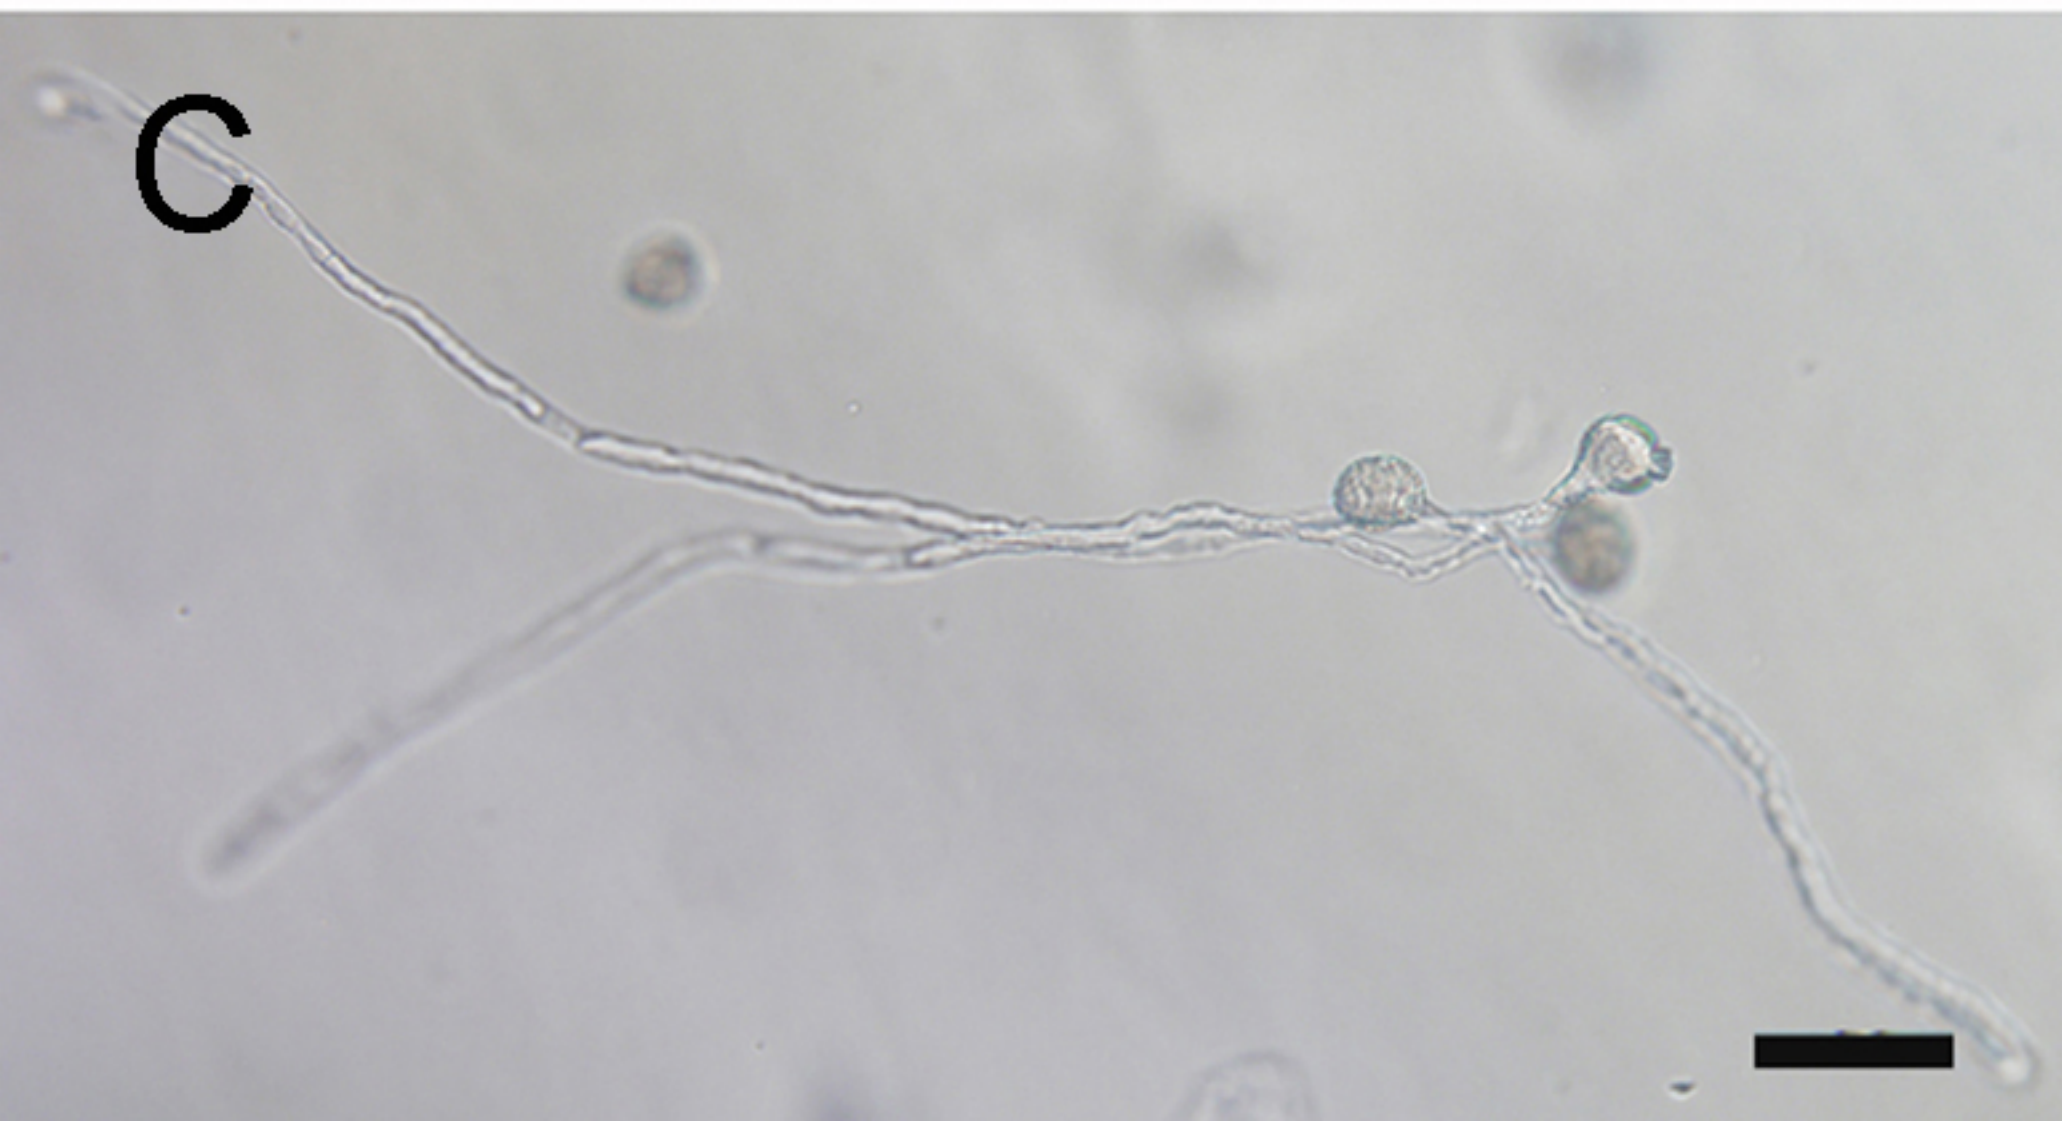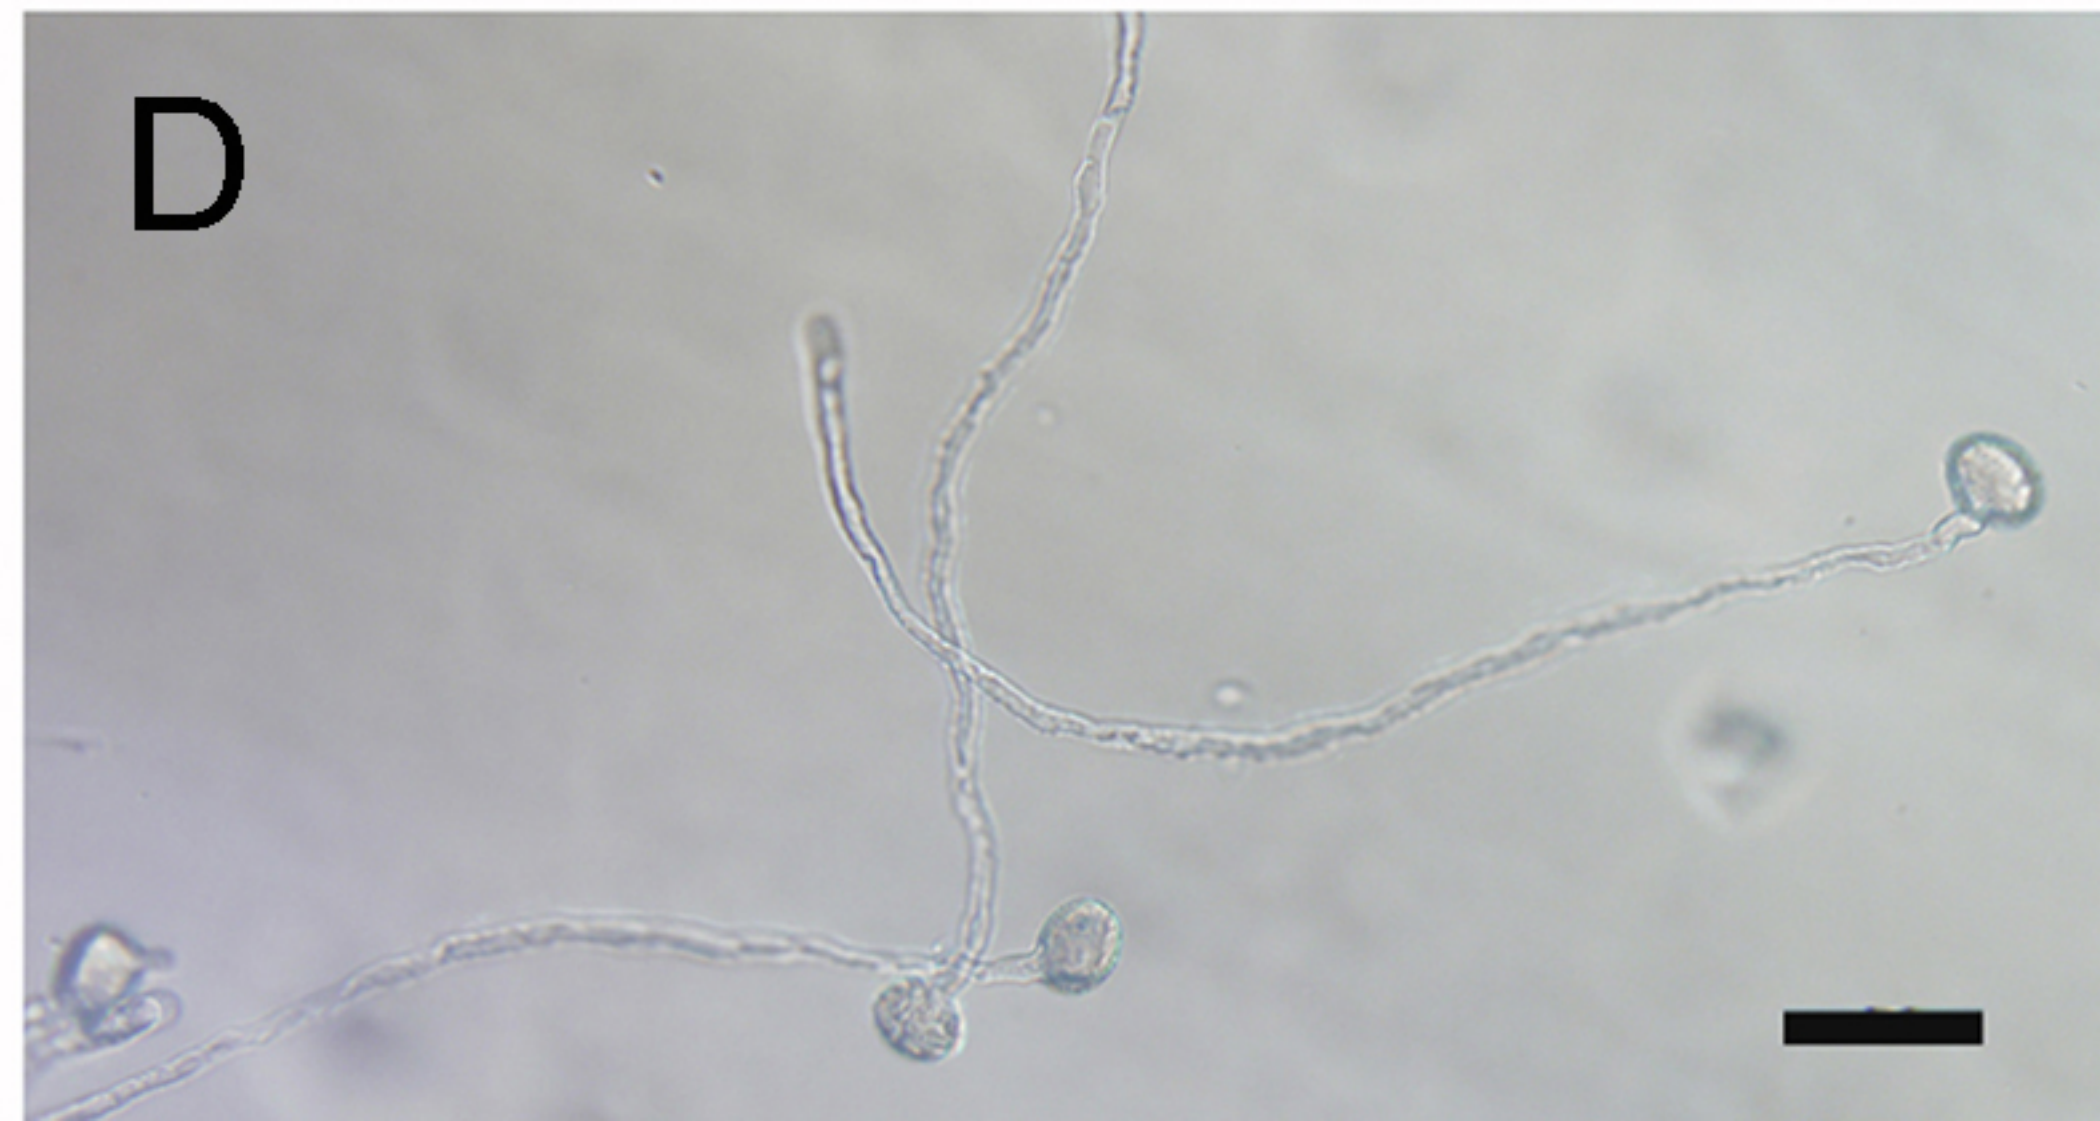

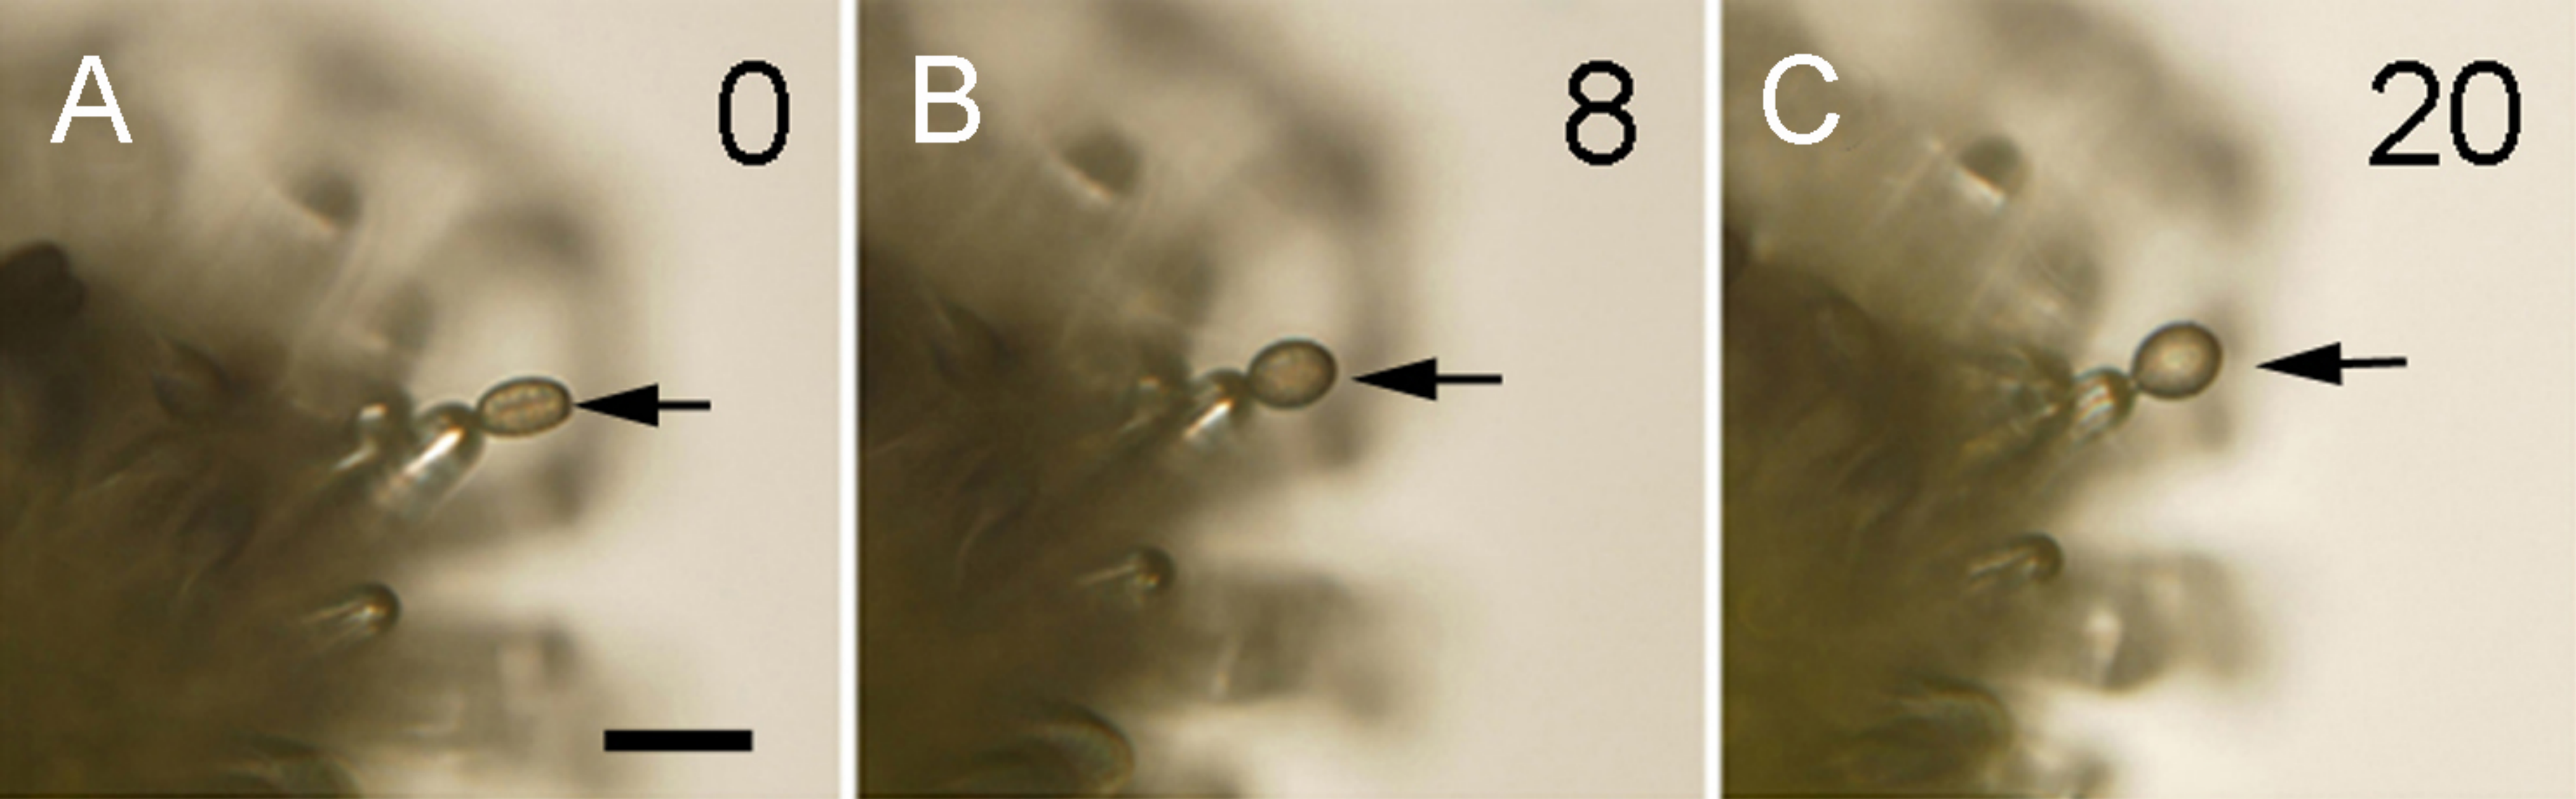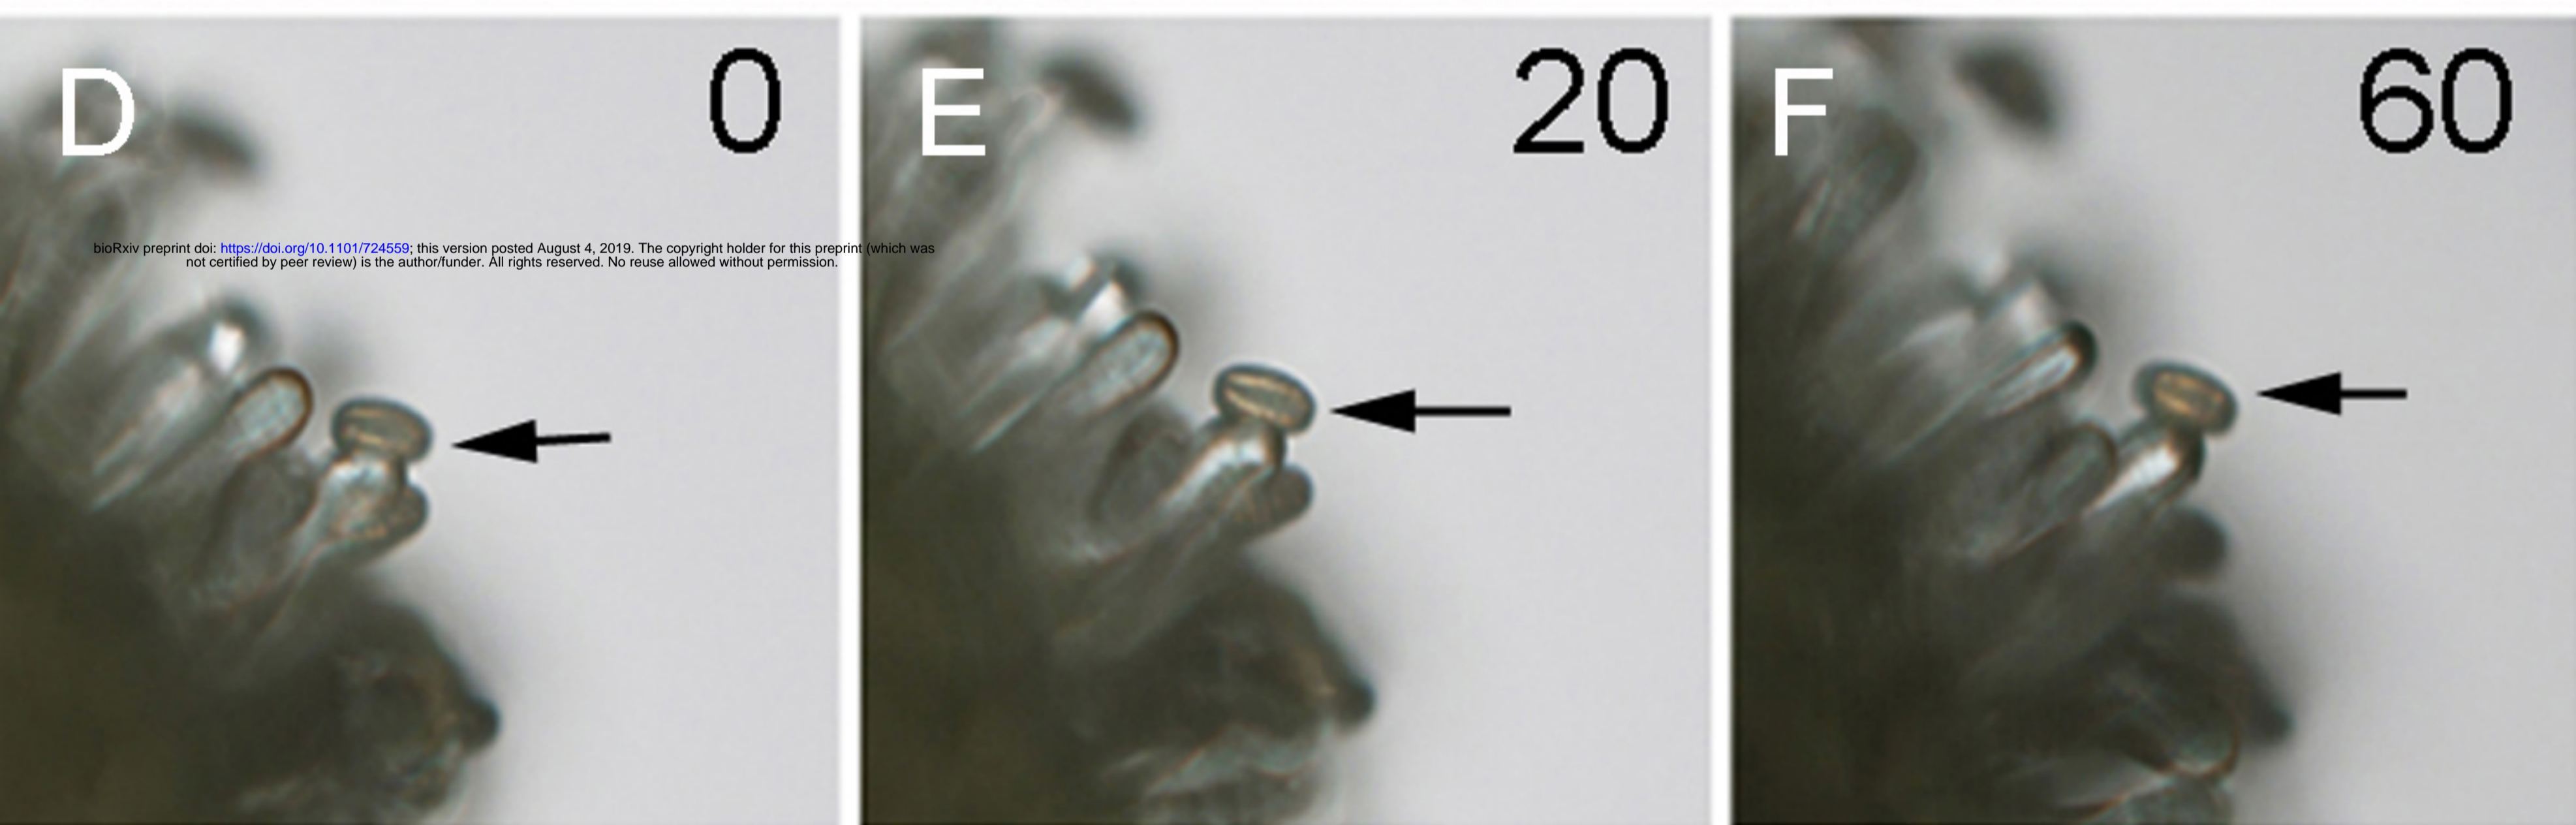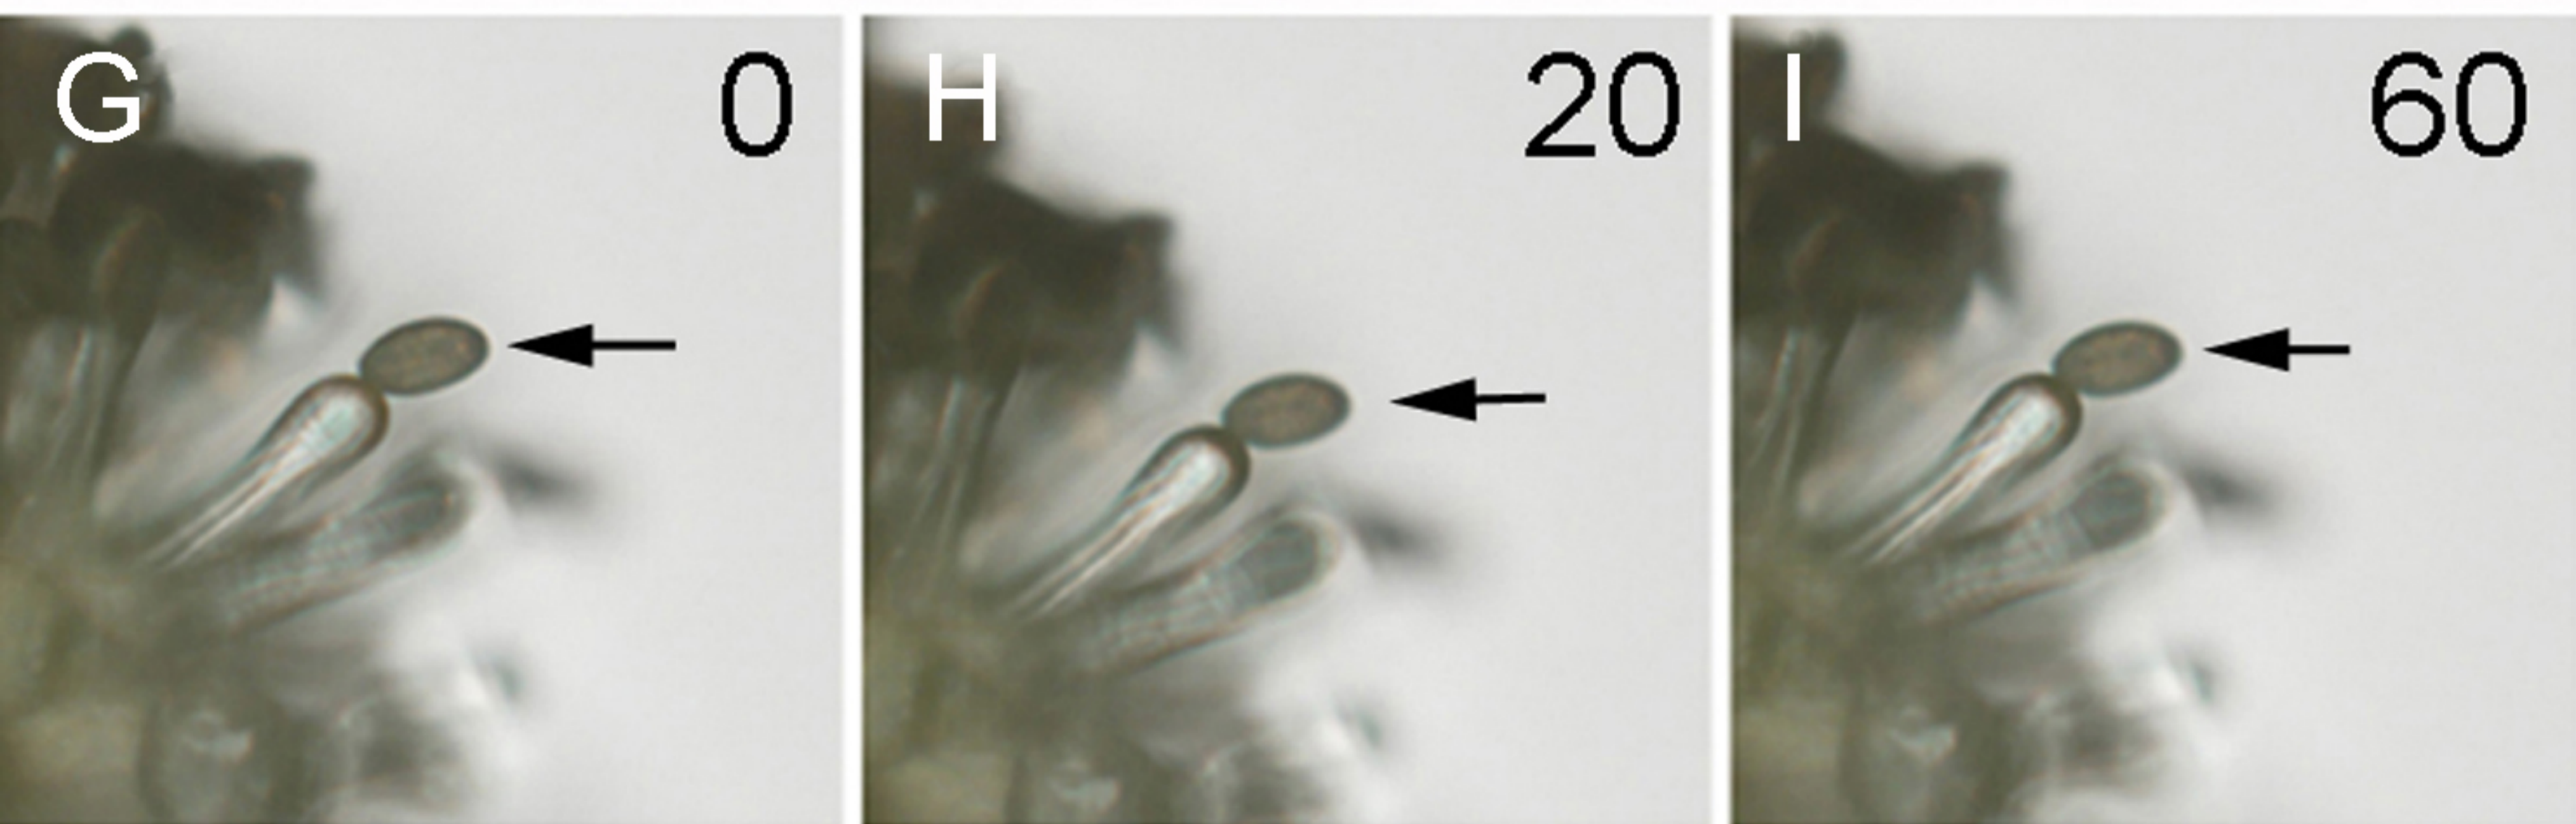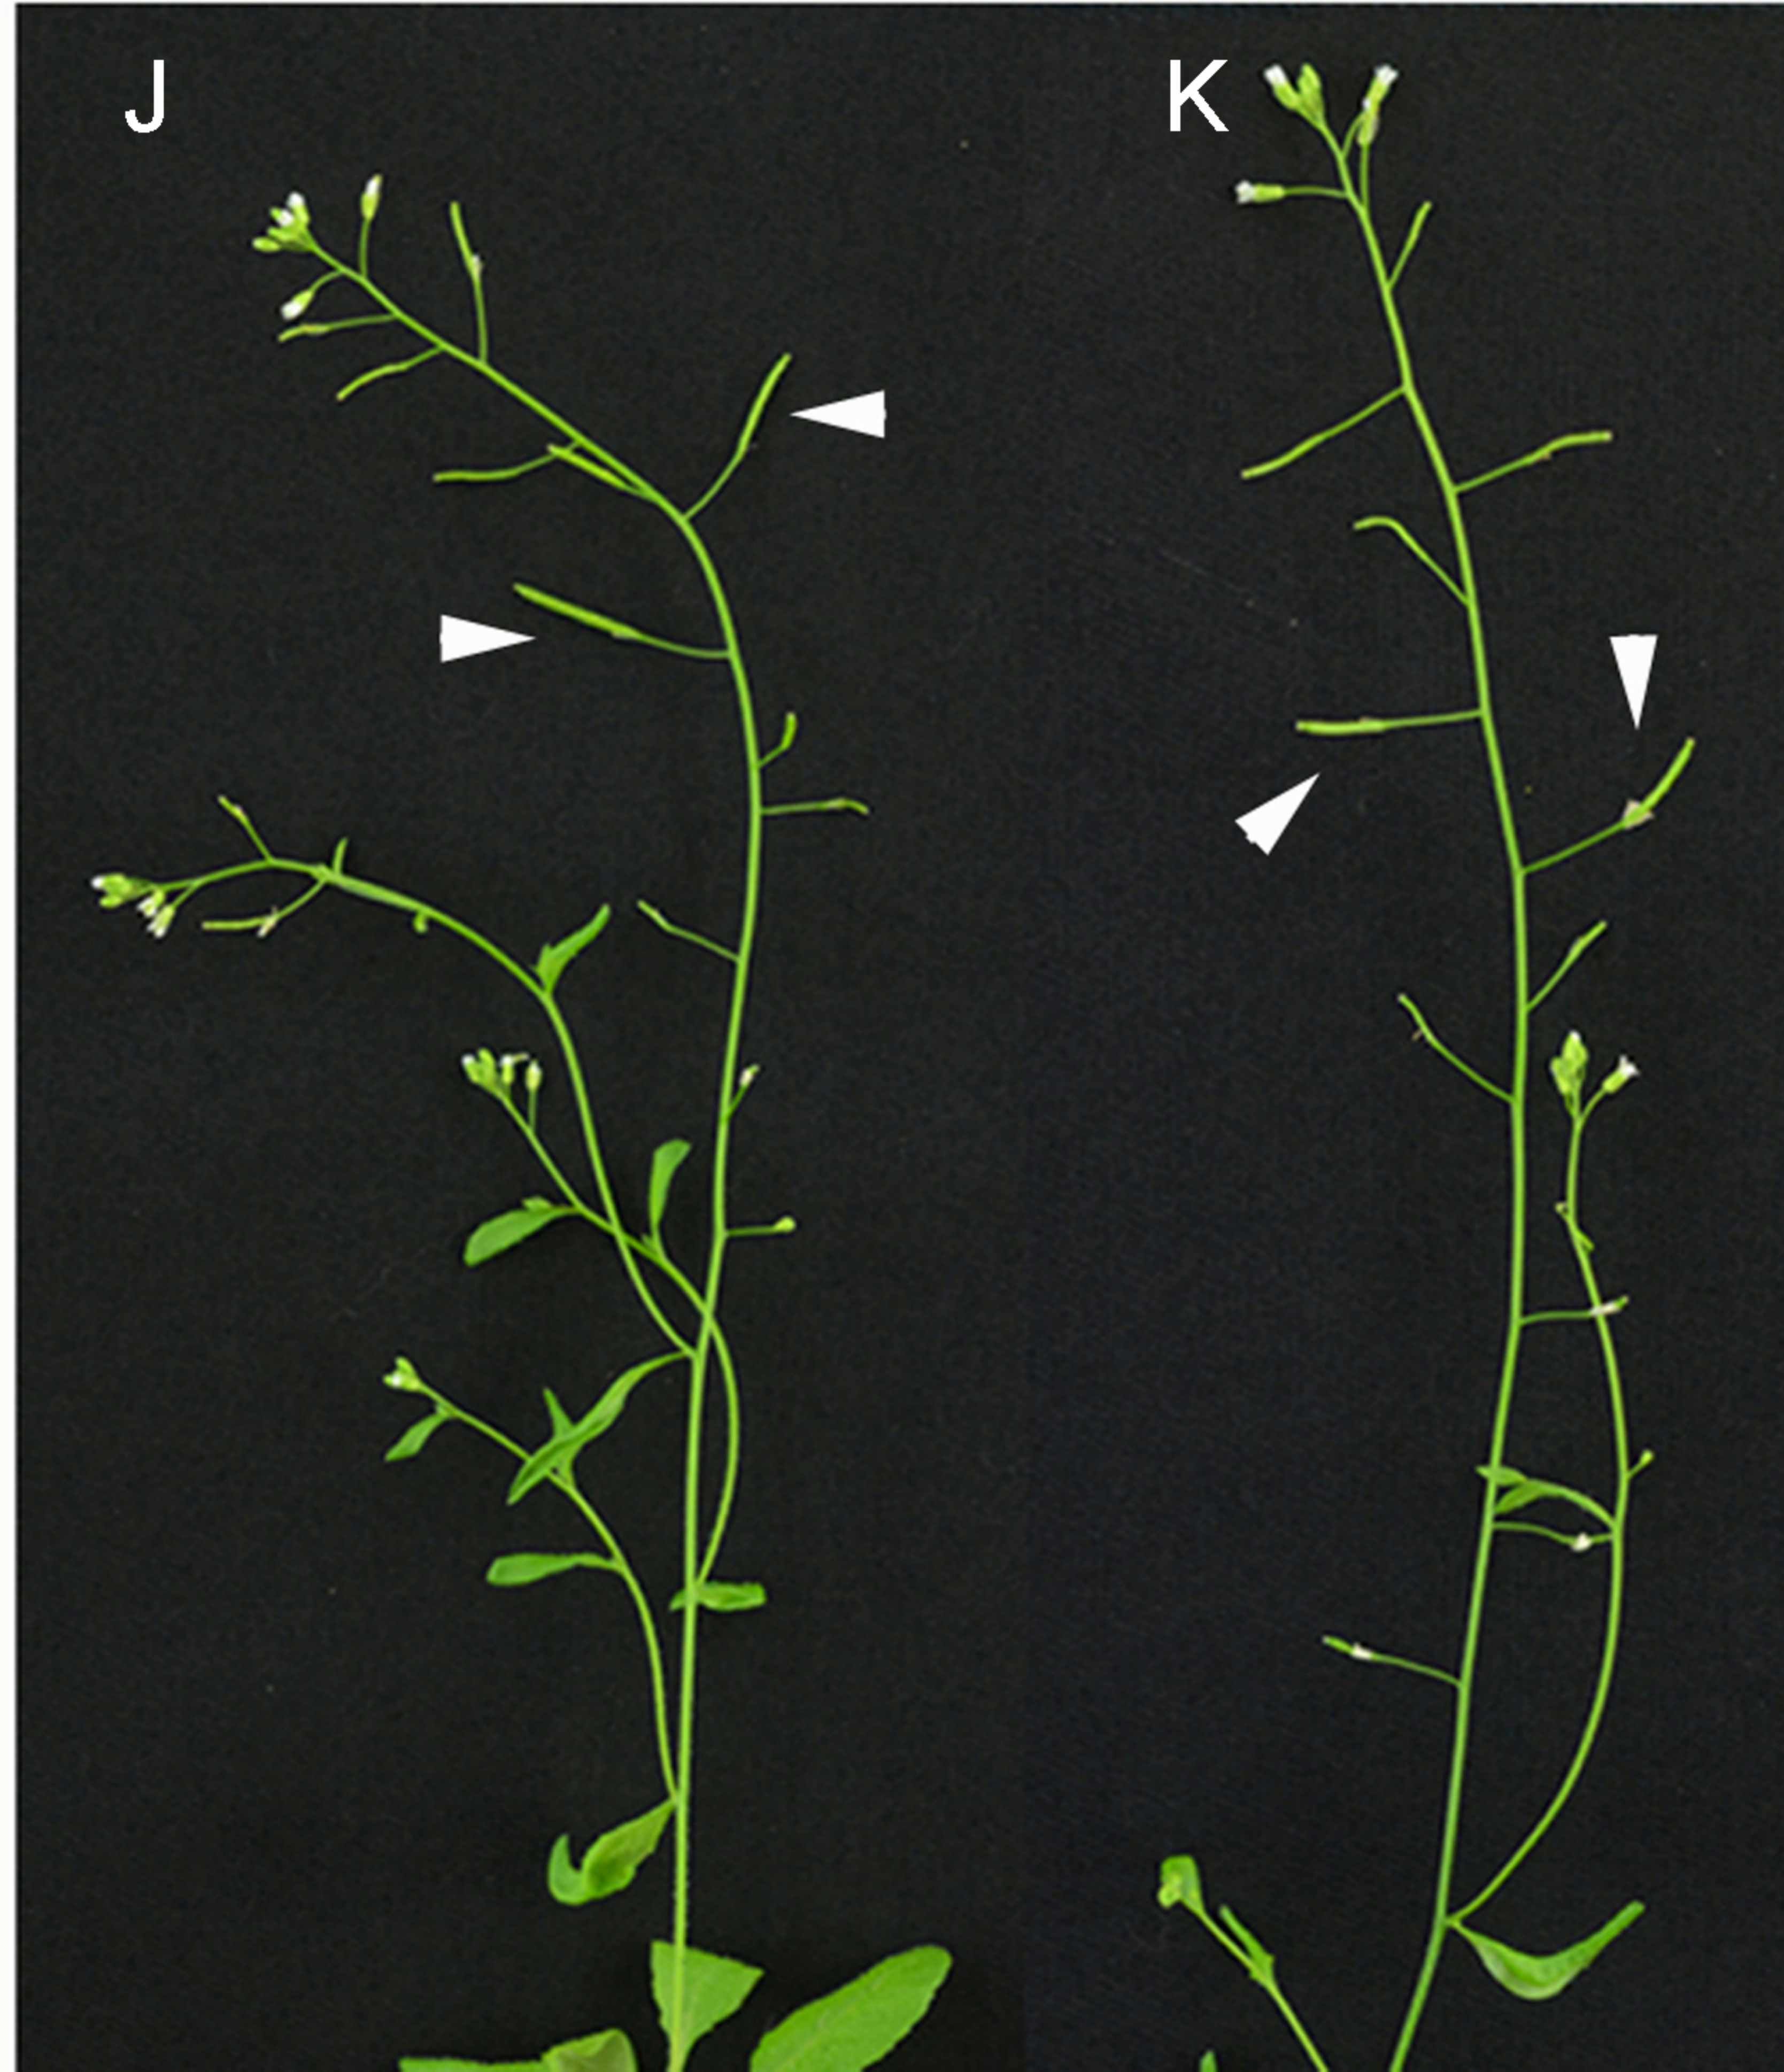

**A**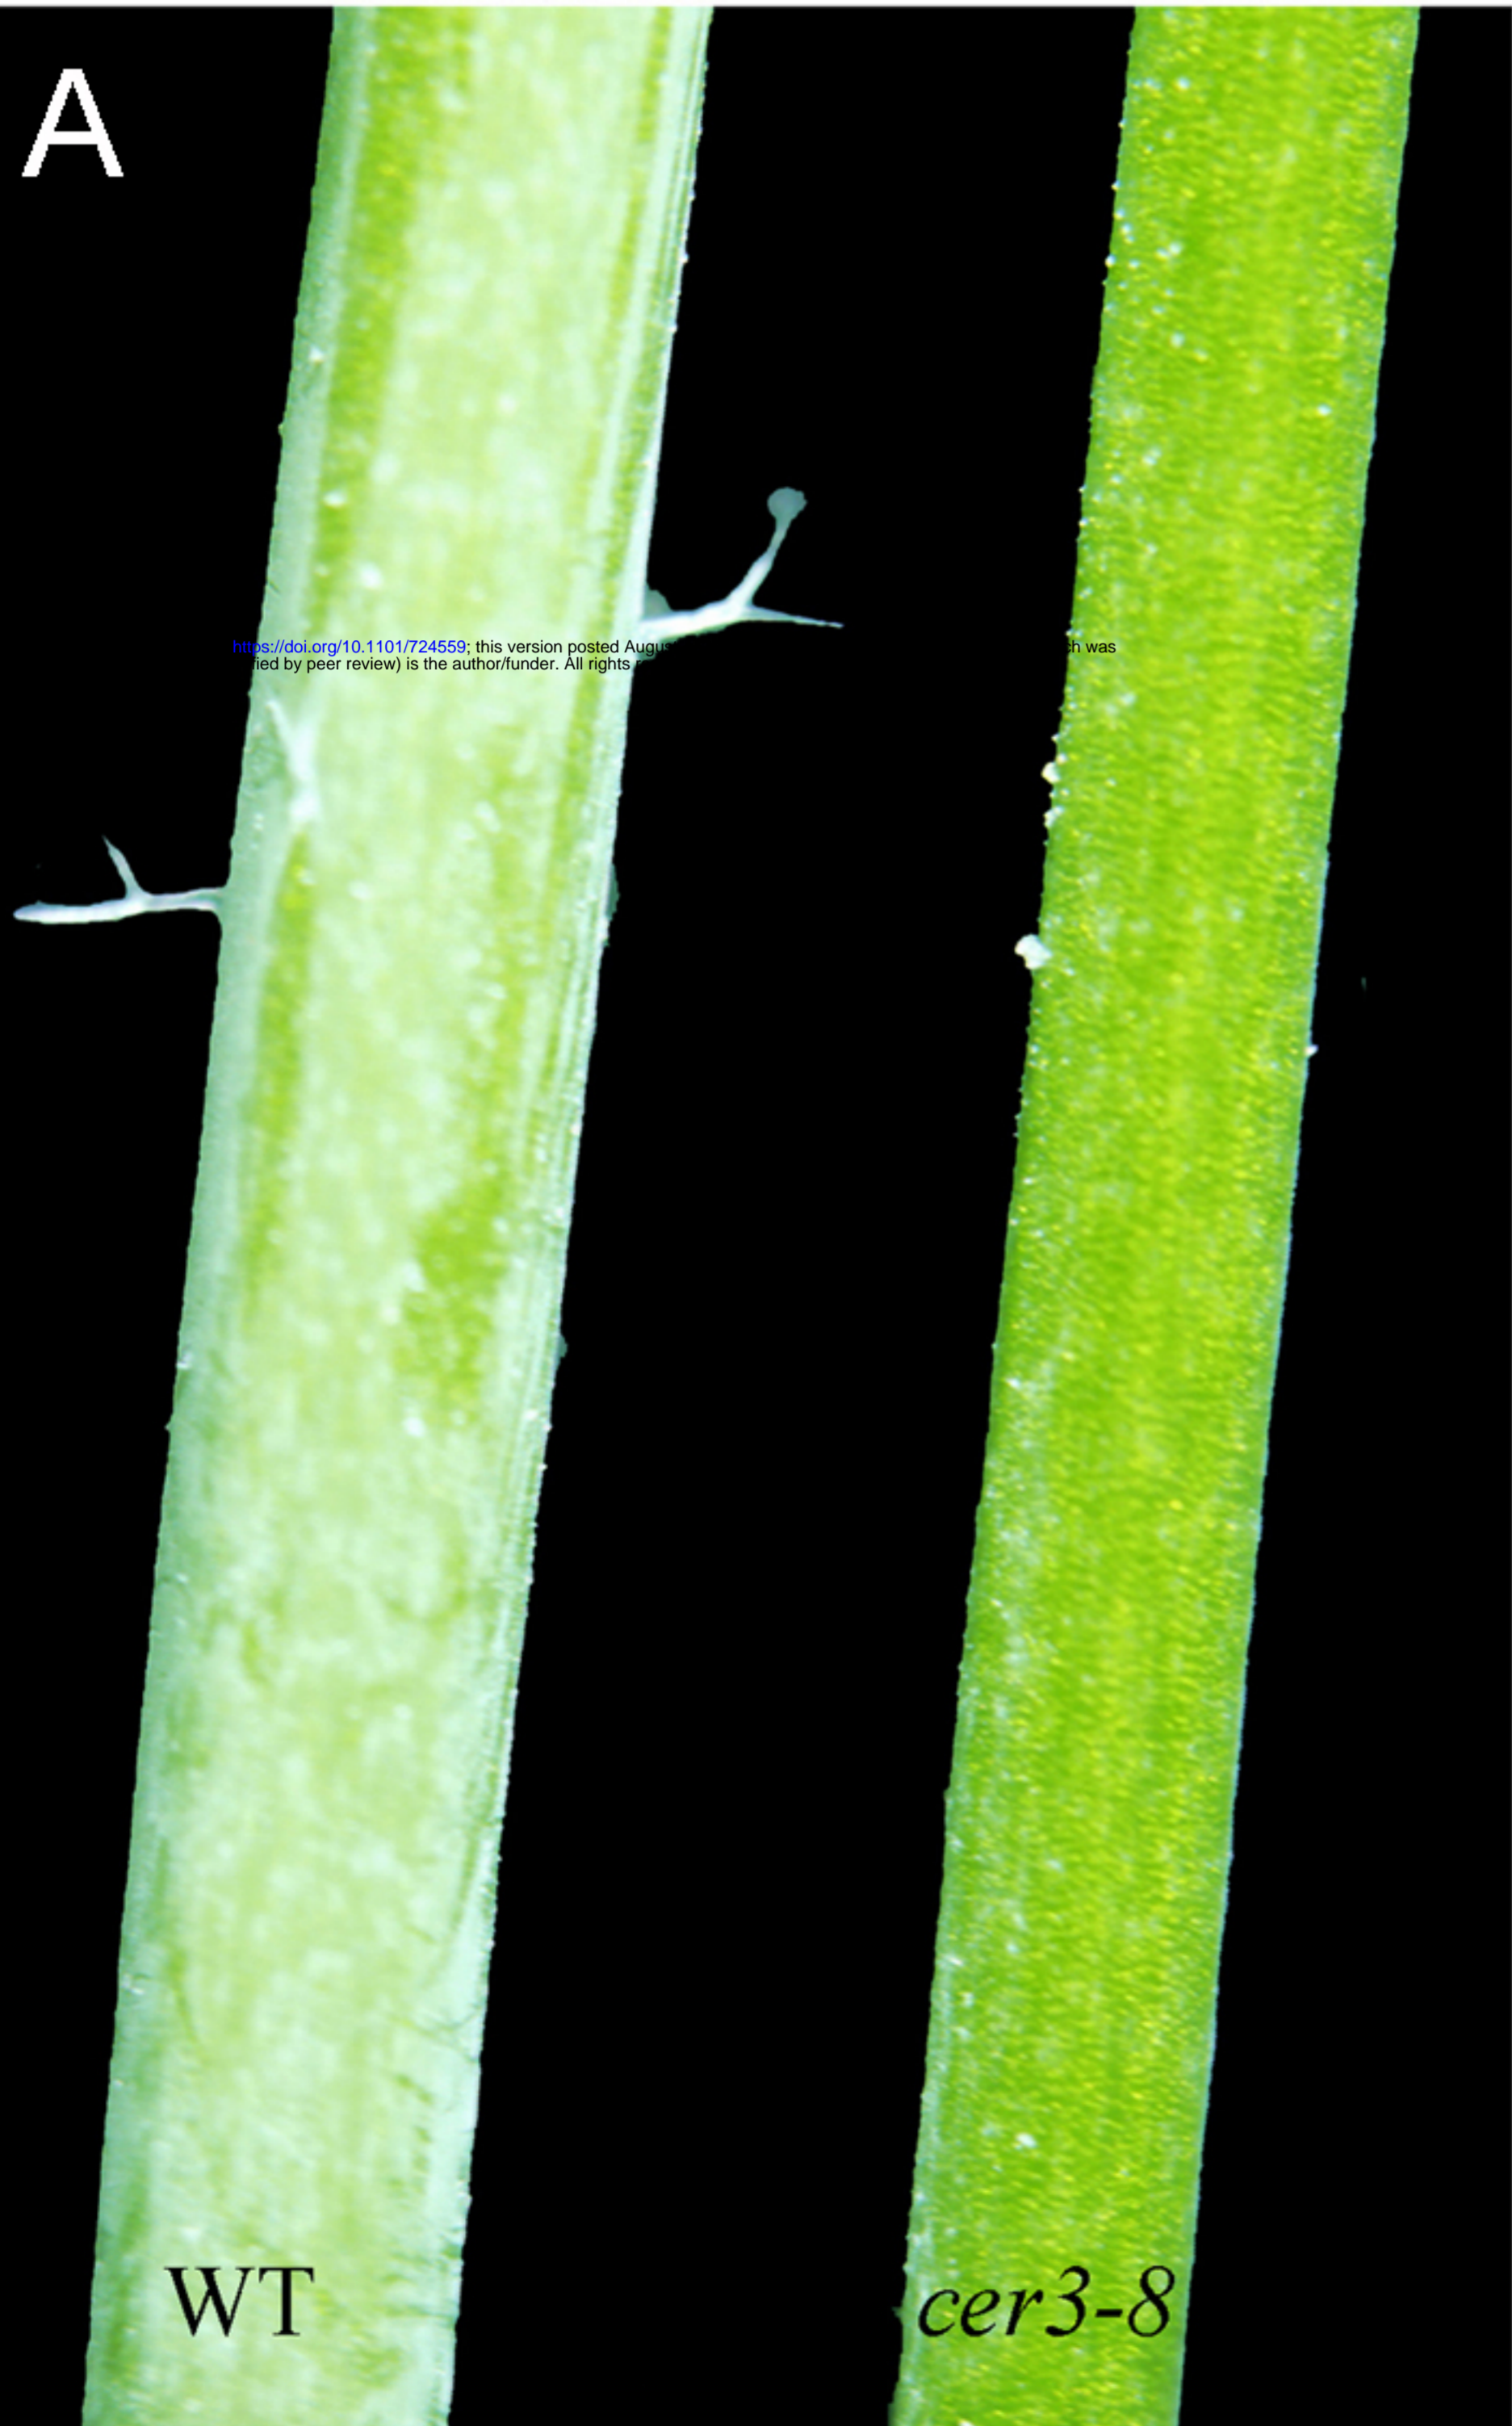**B**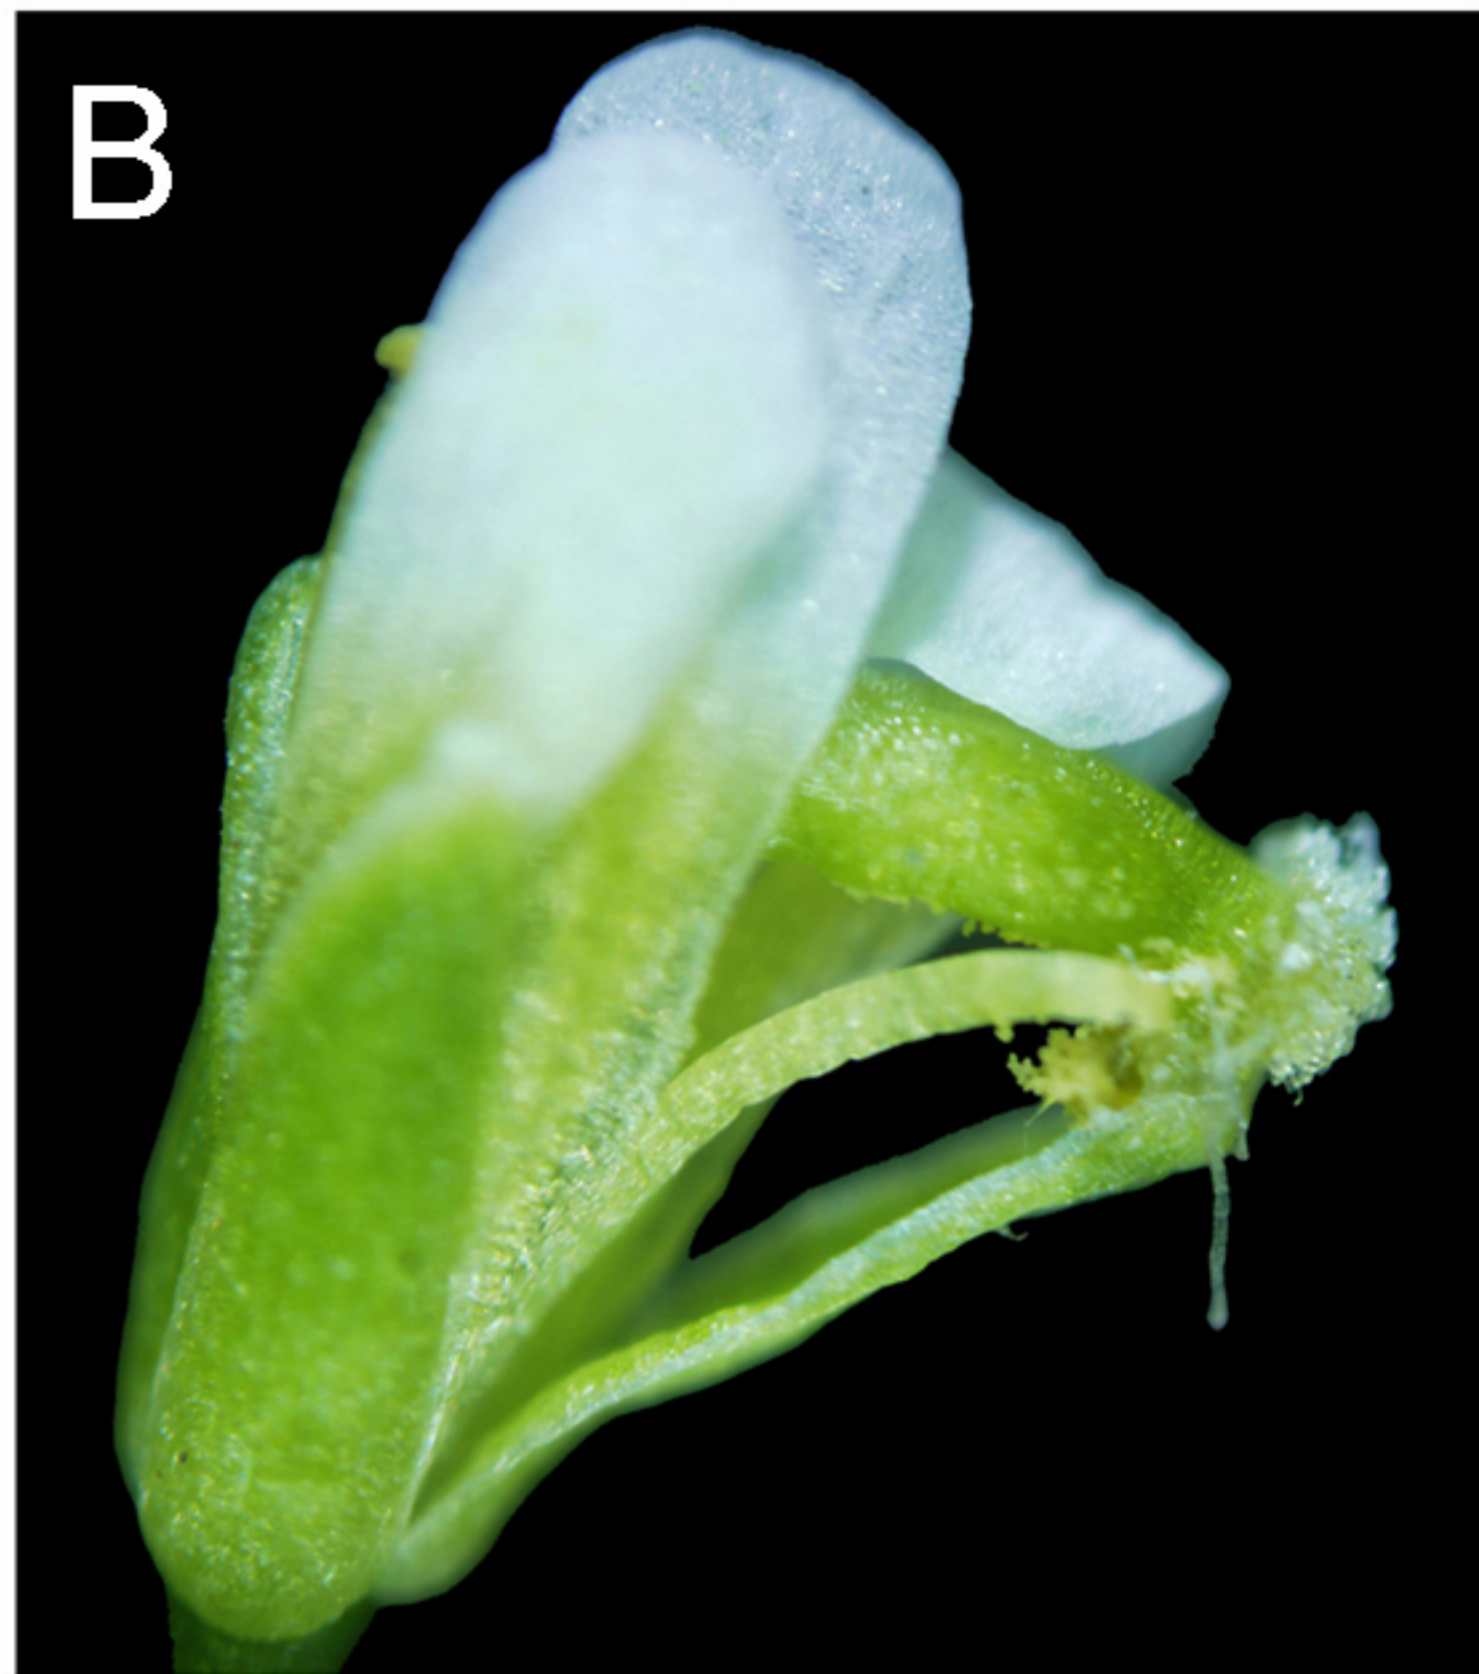**C**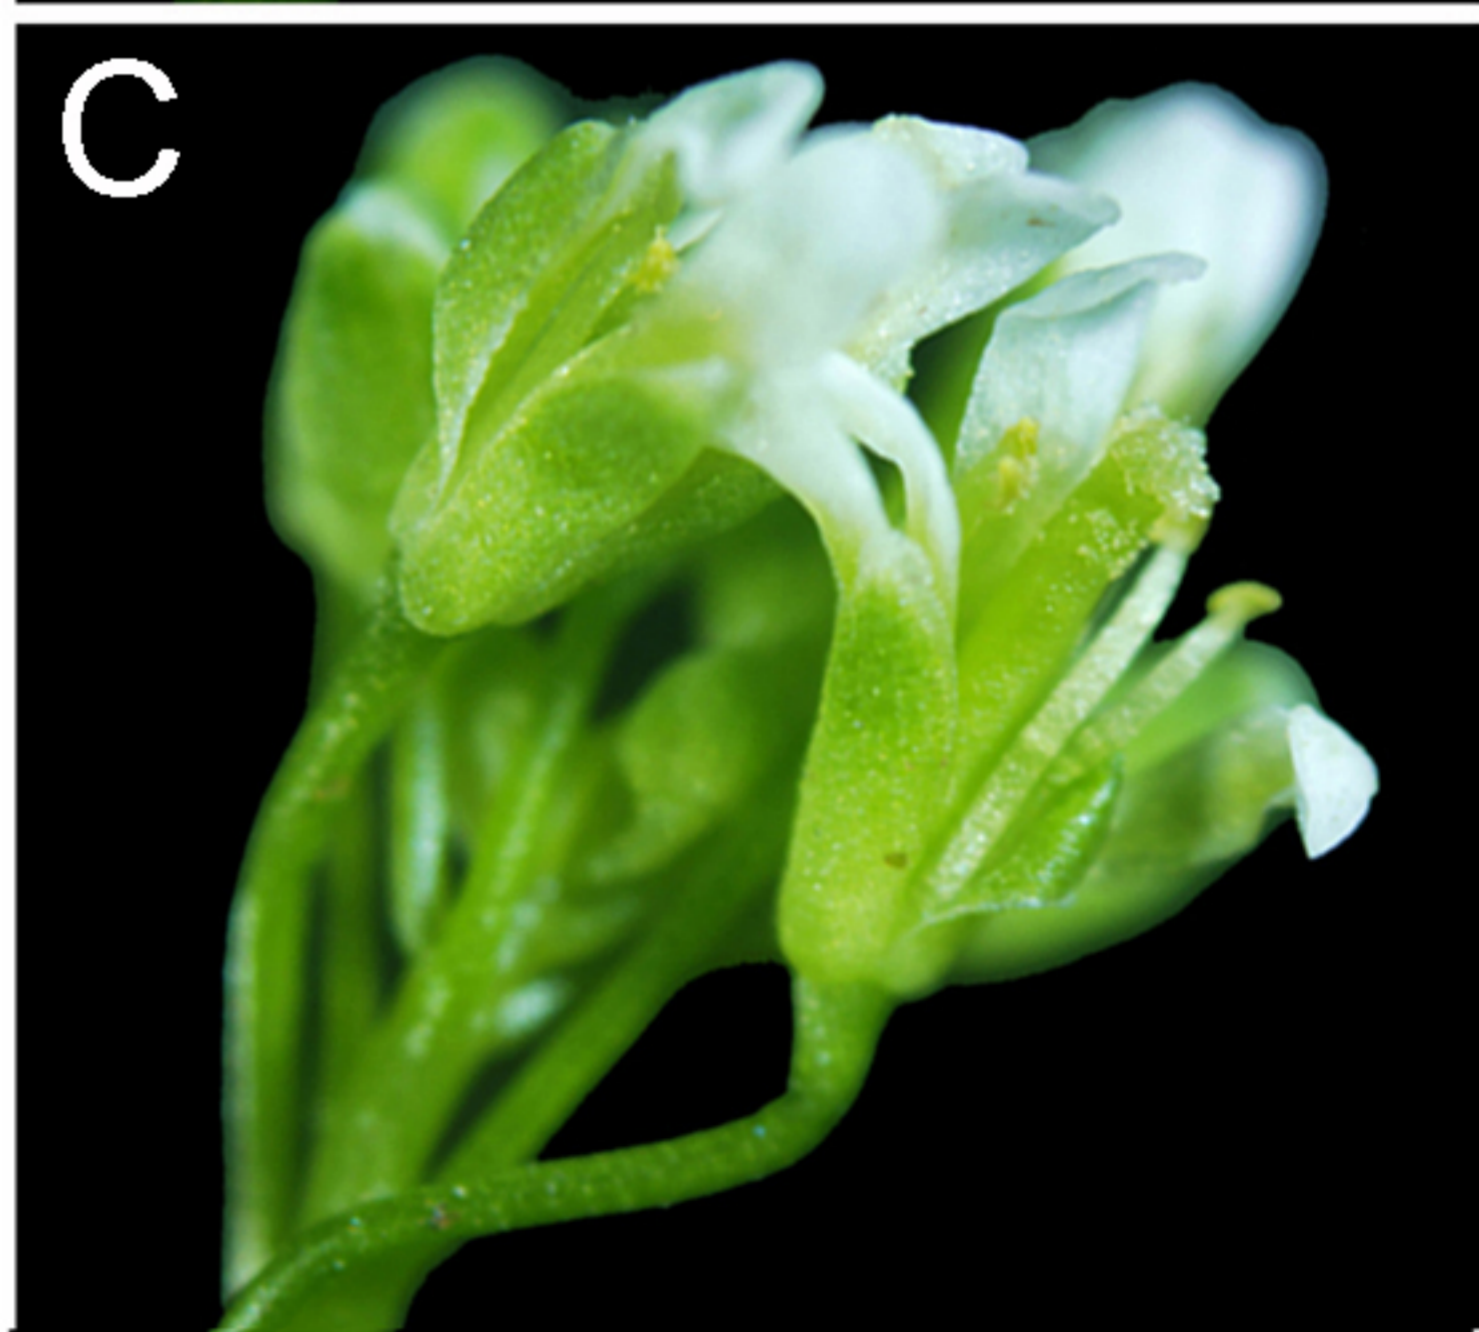



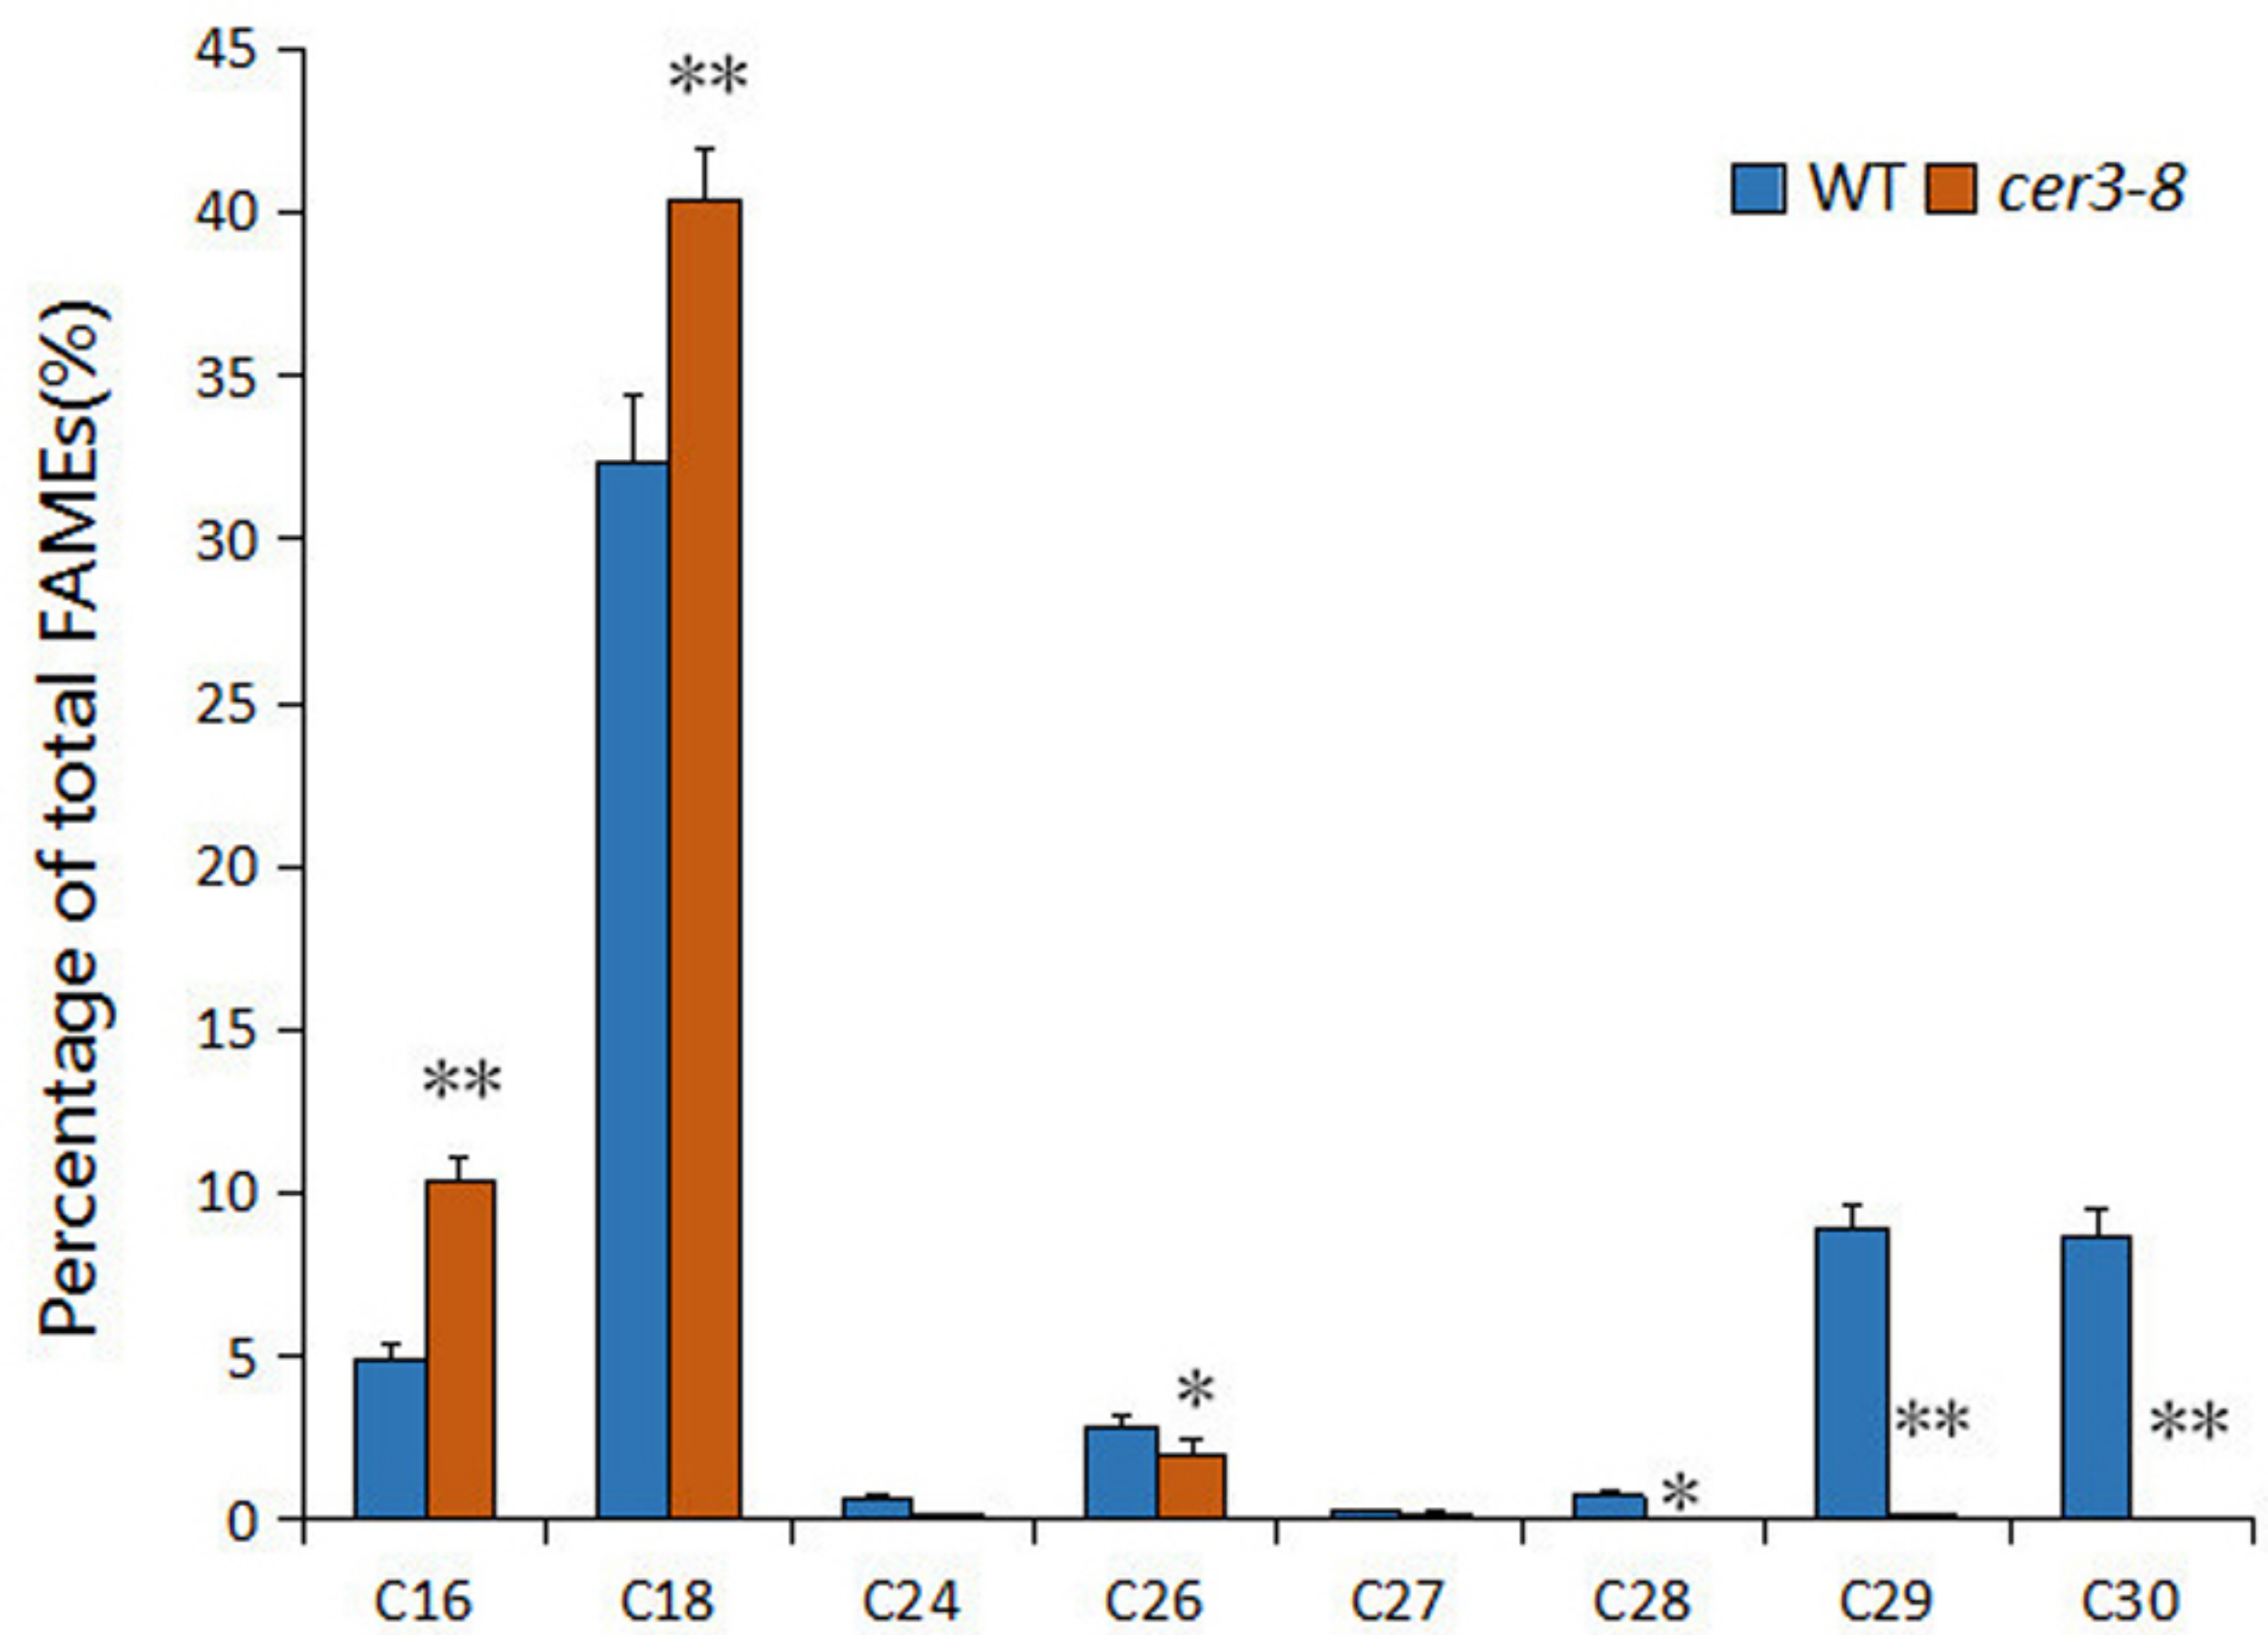

A

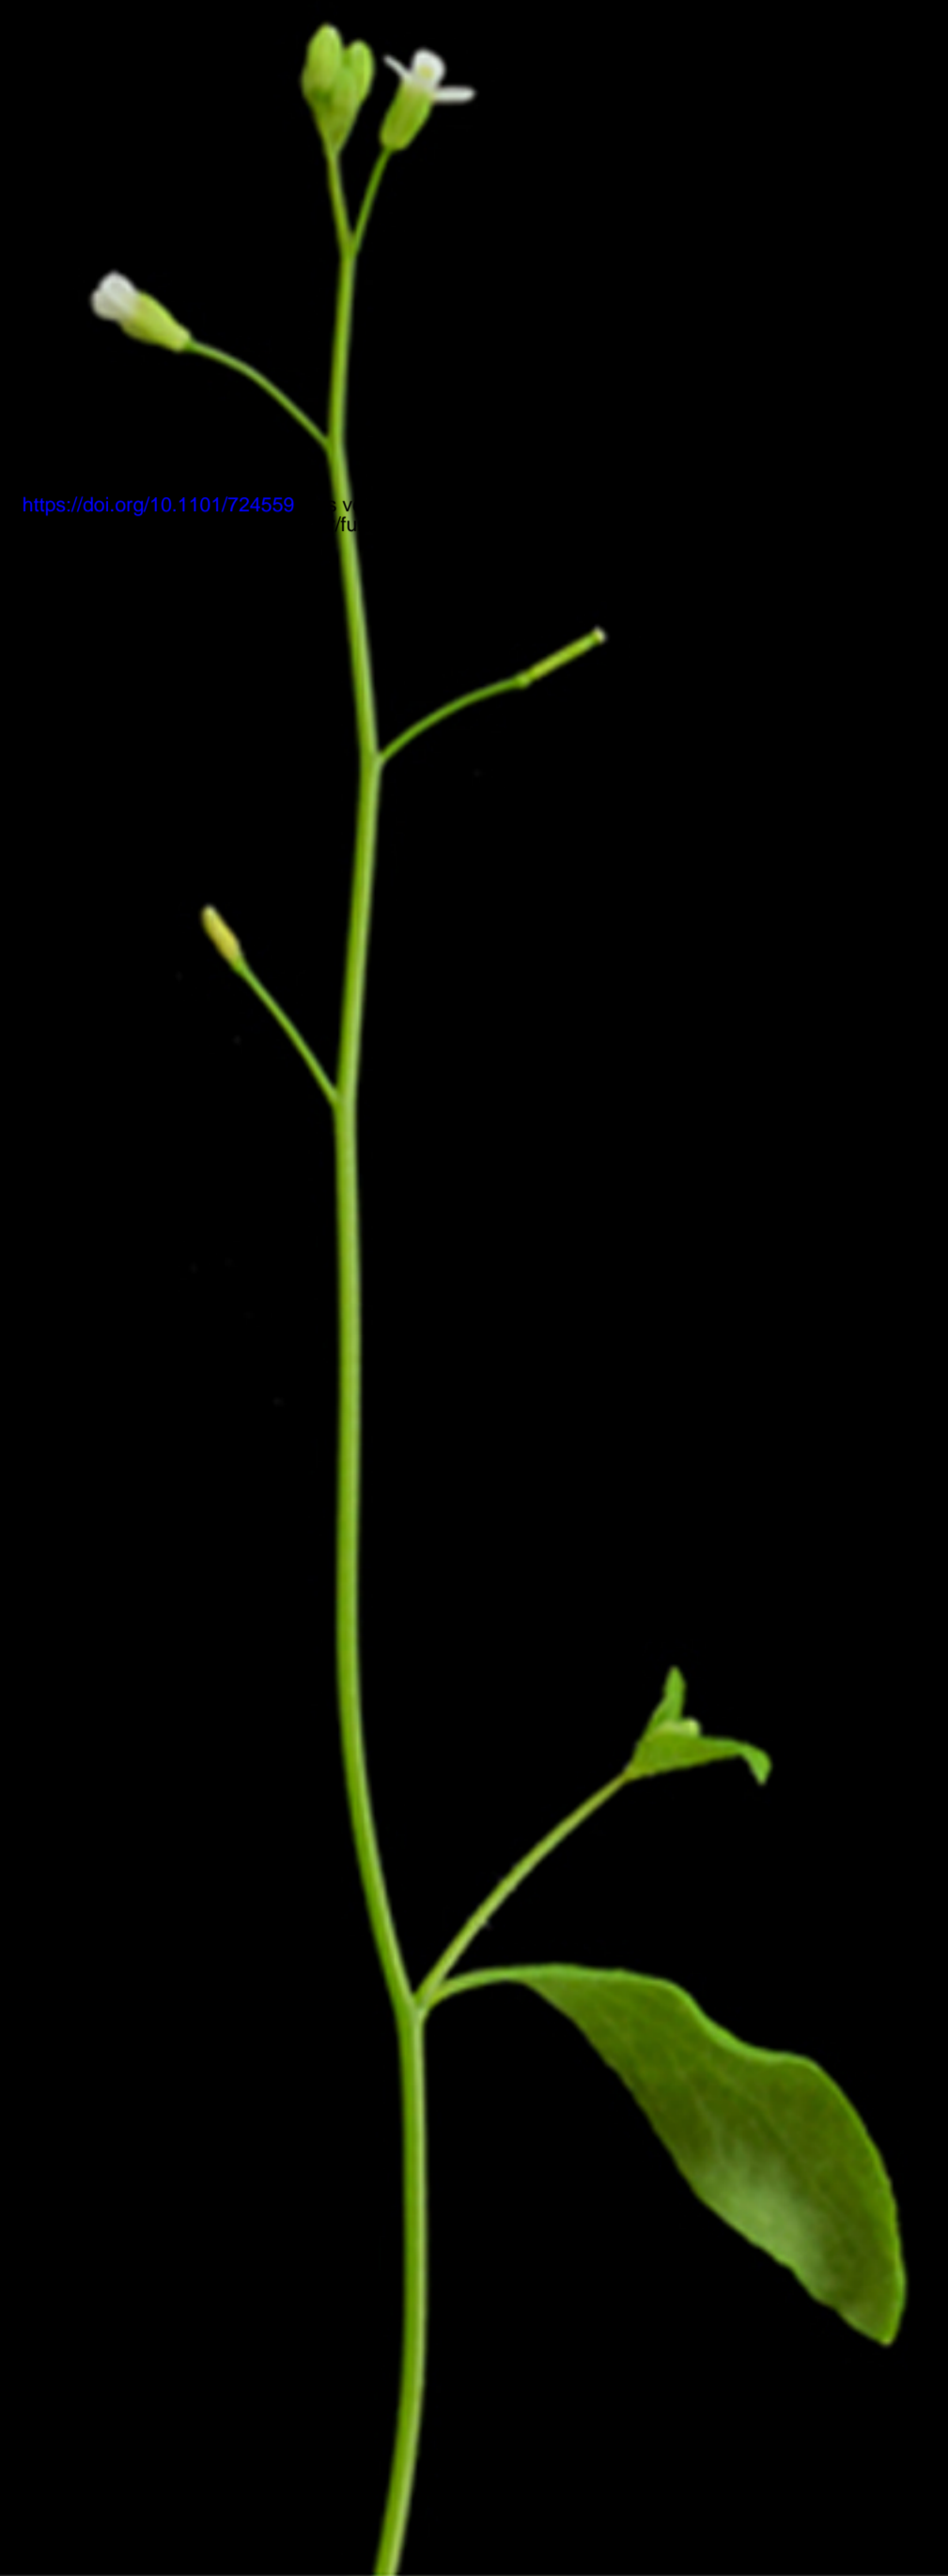

B

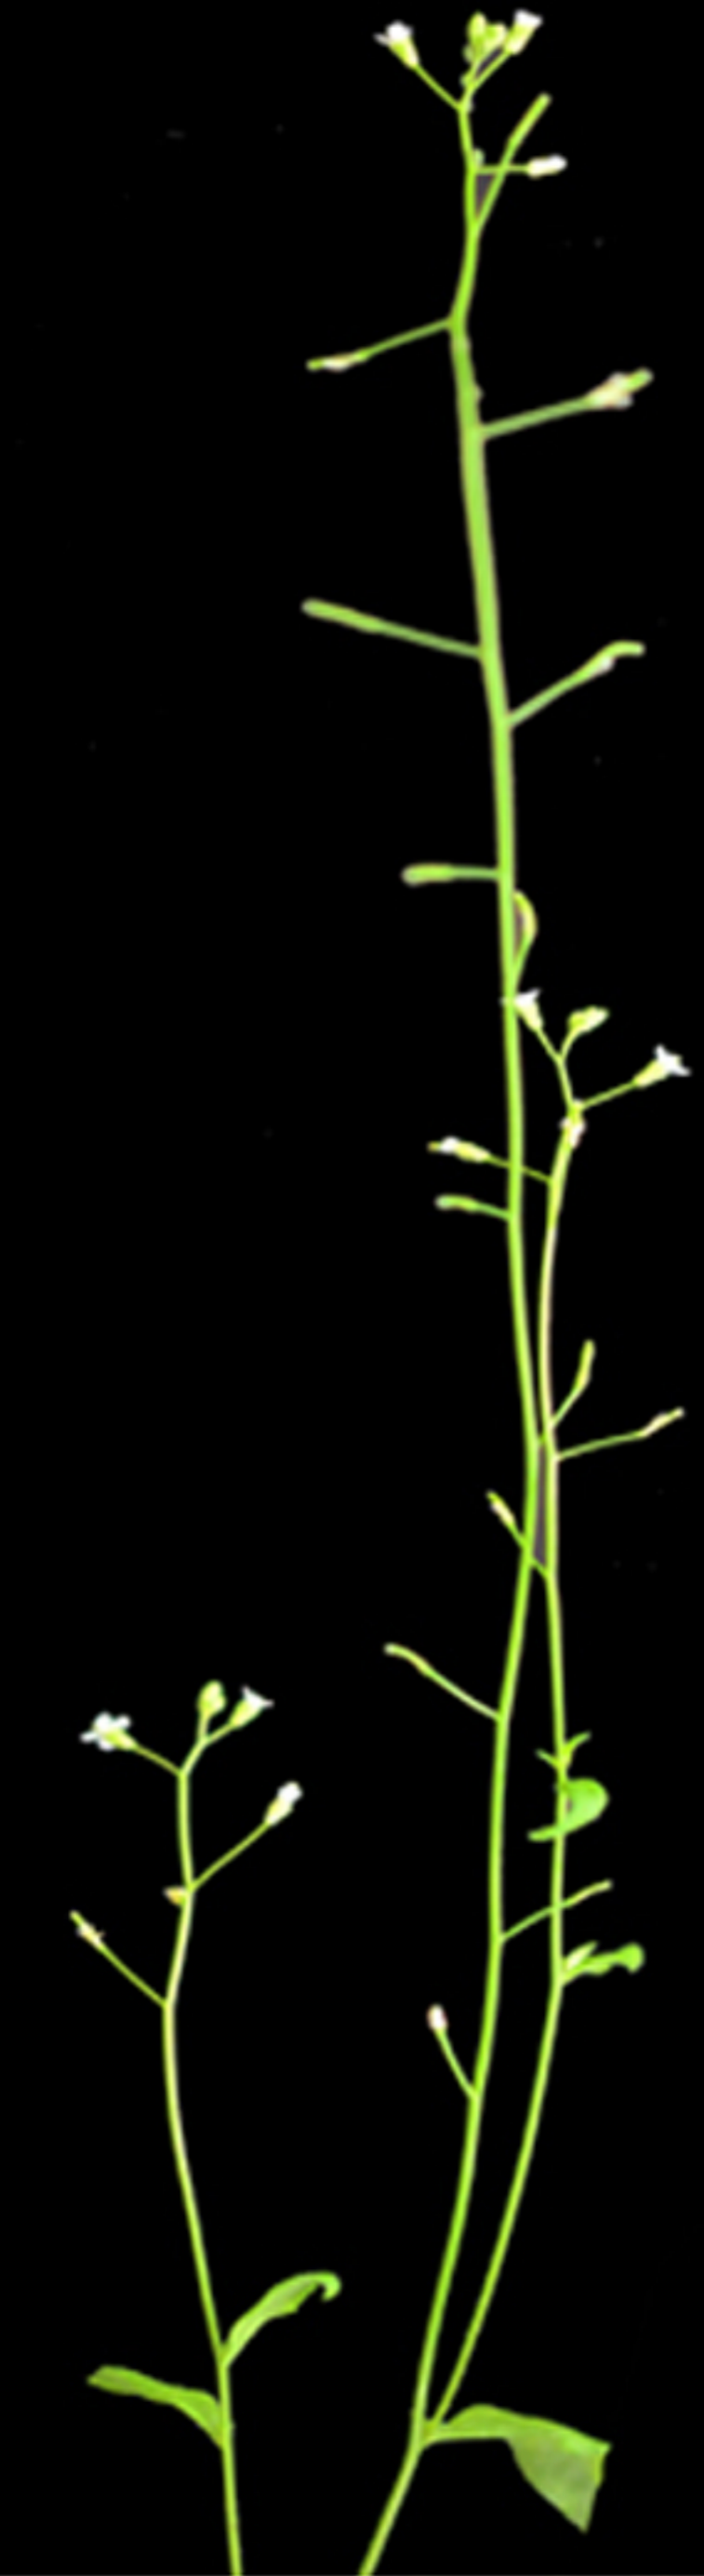

C

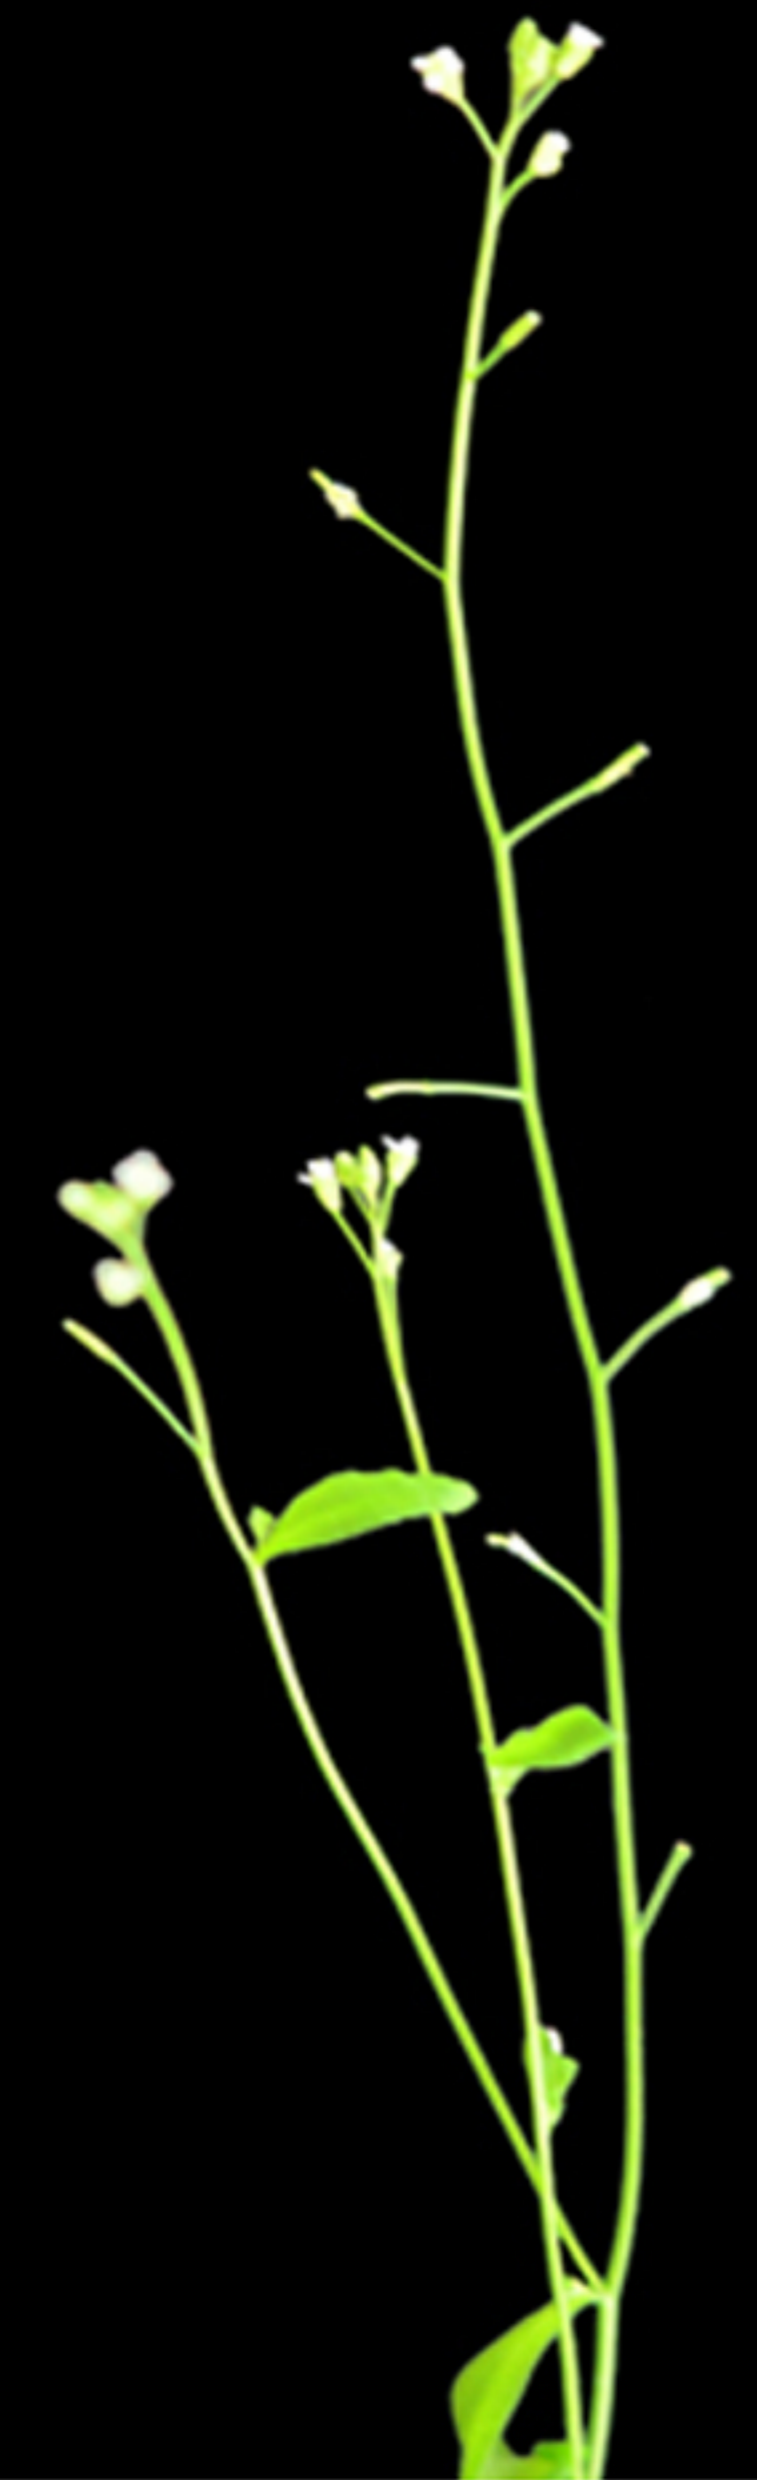

D

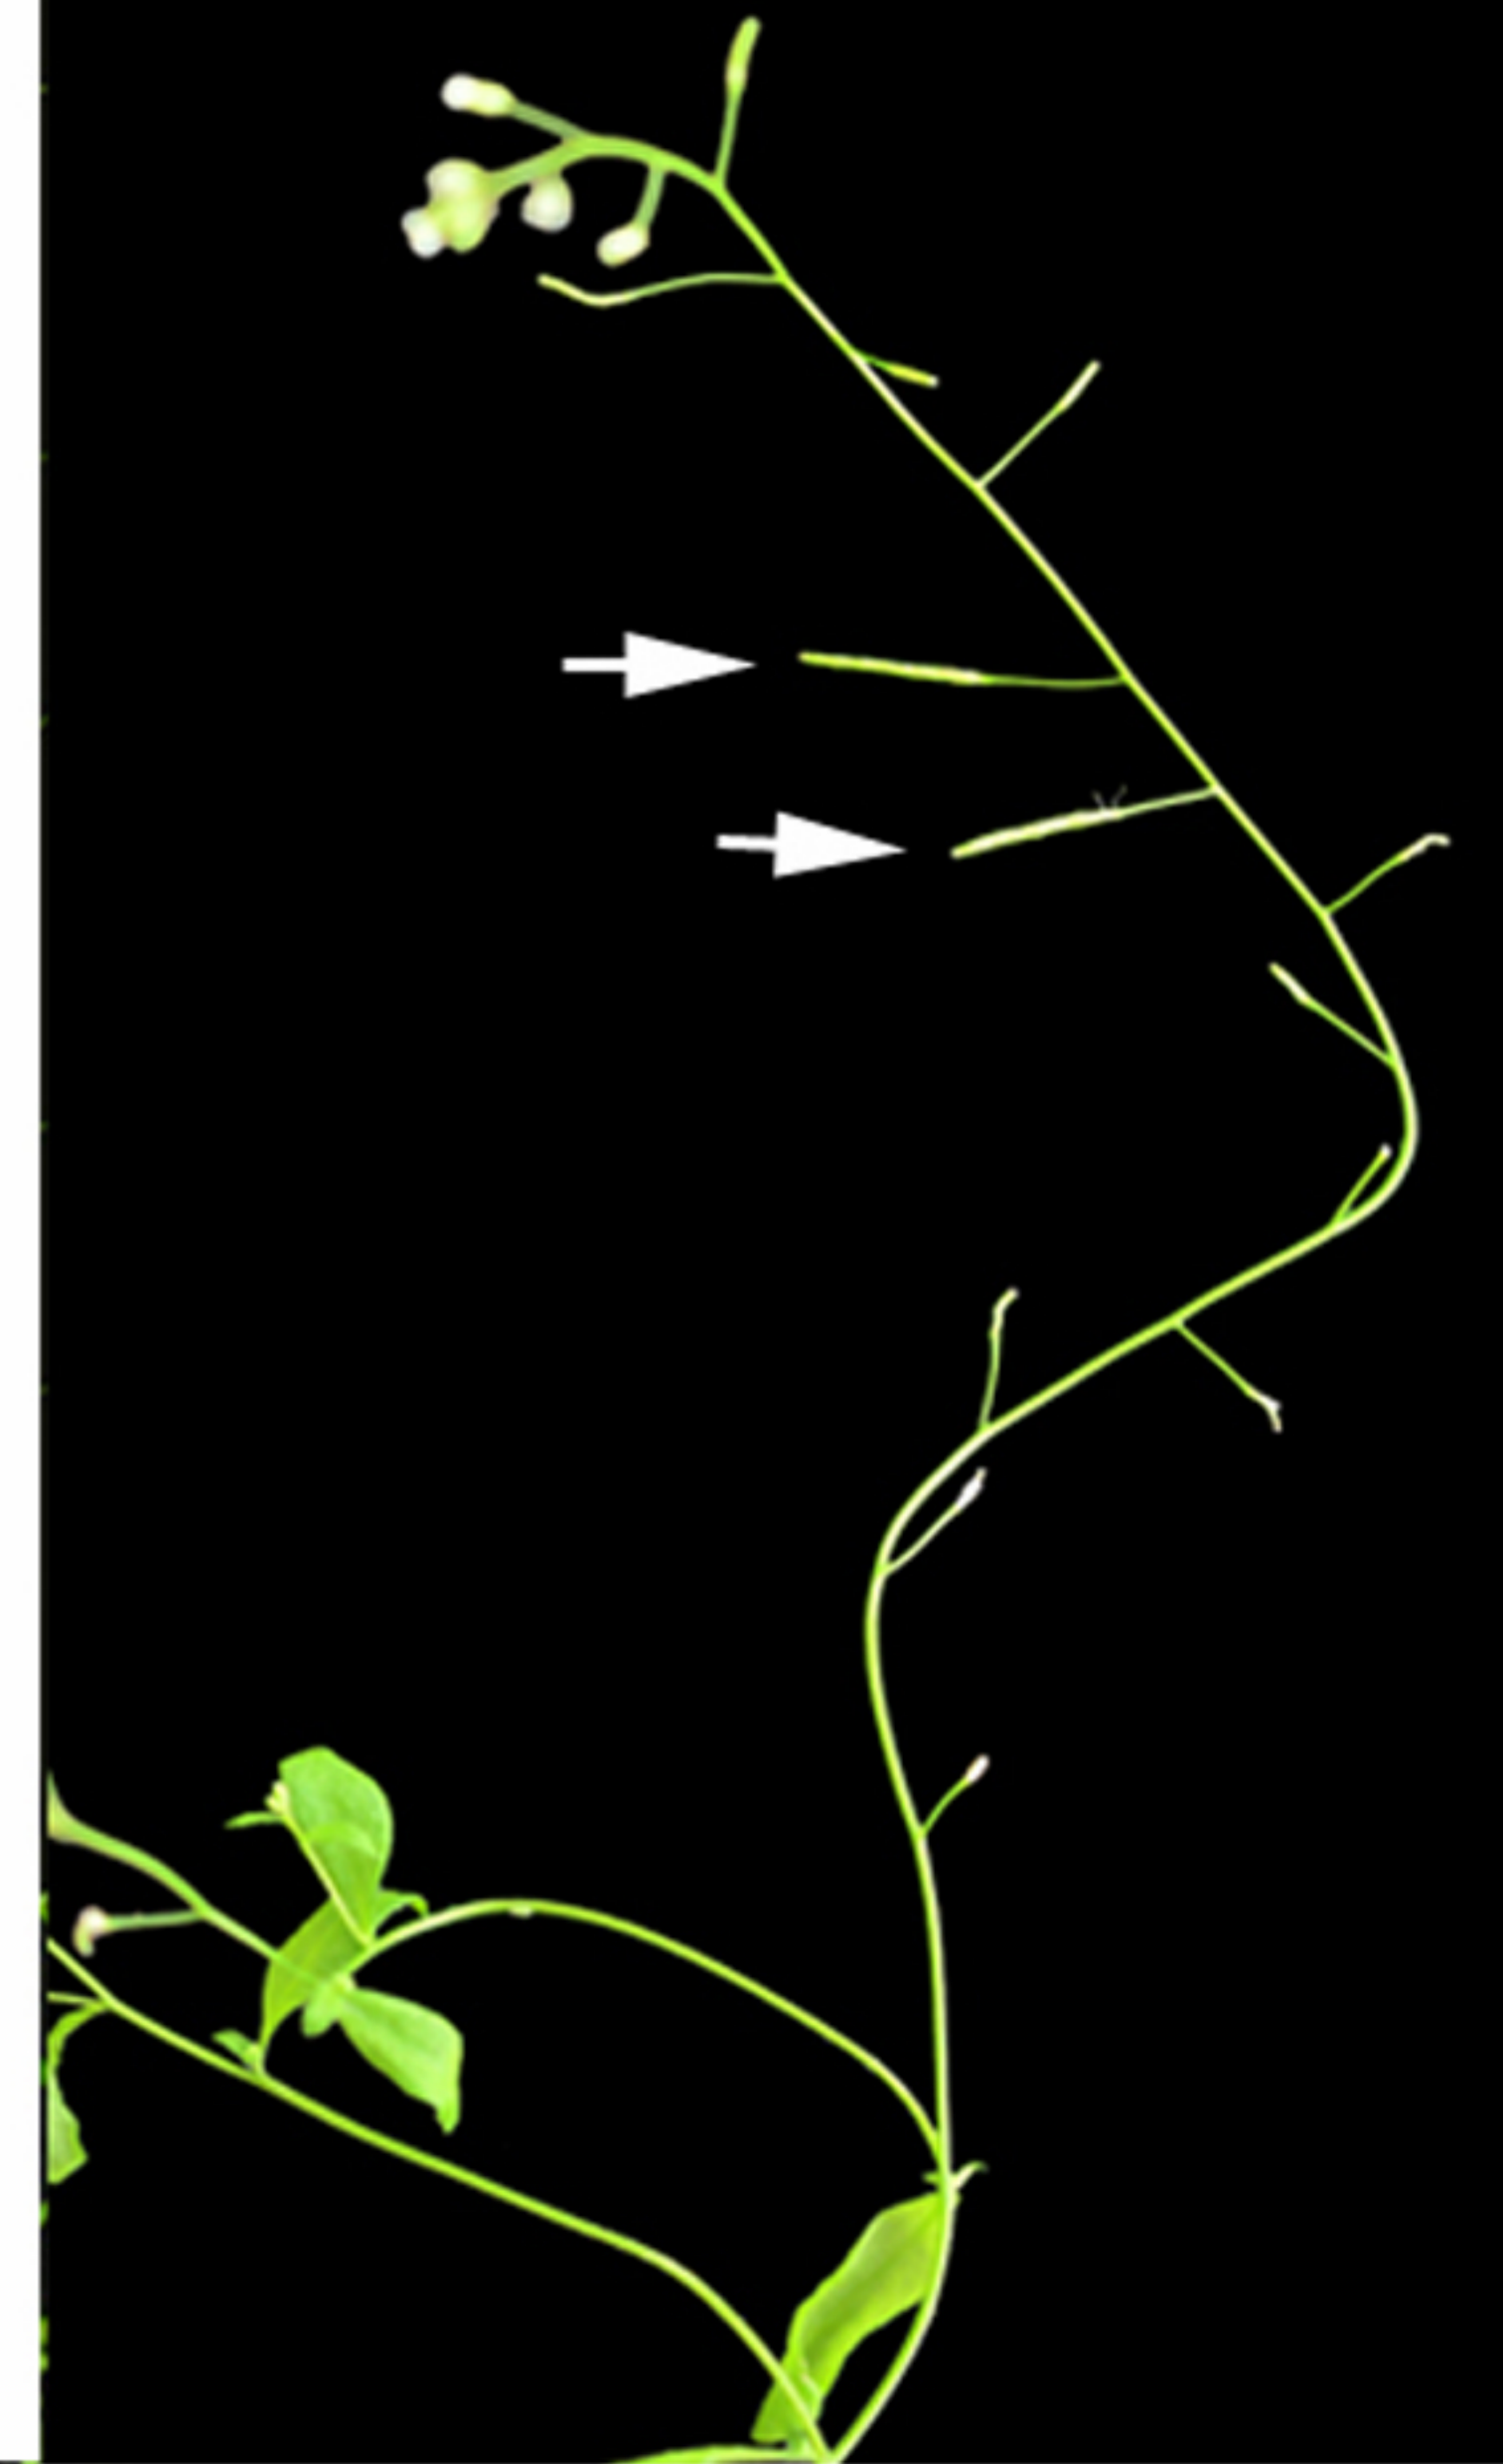

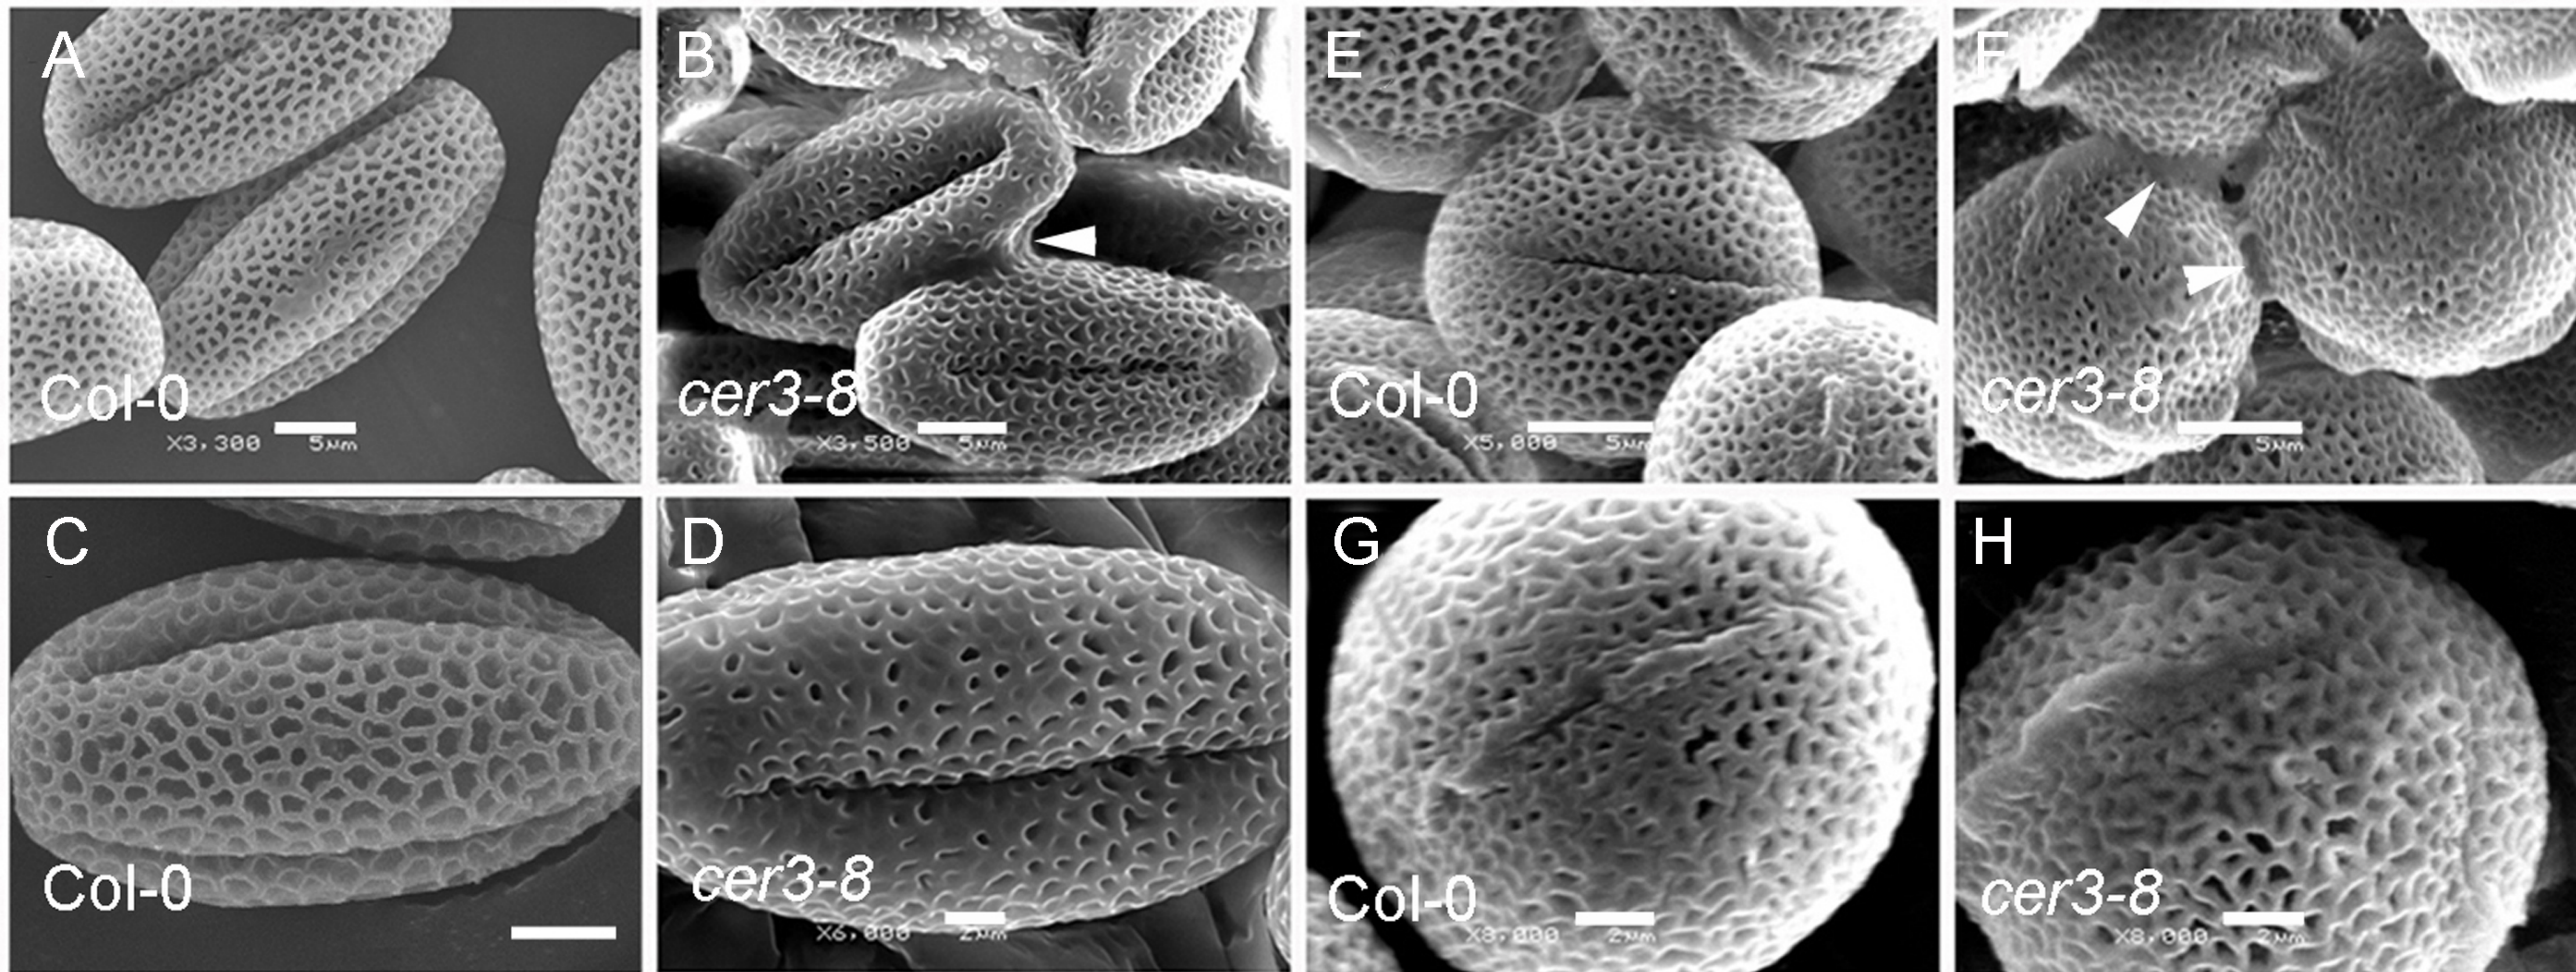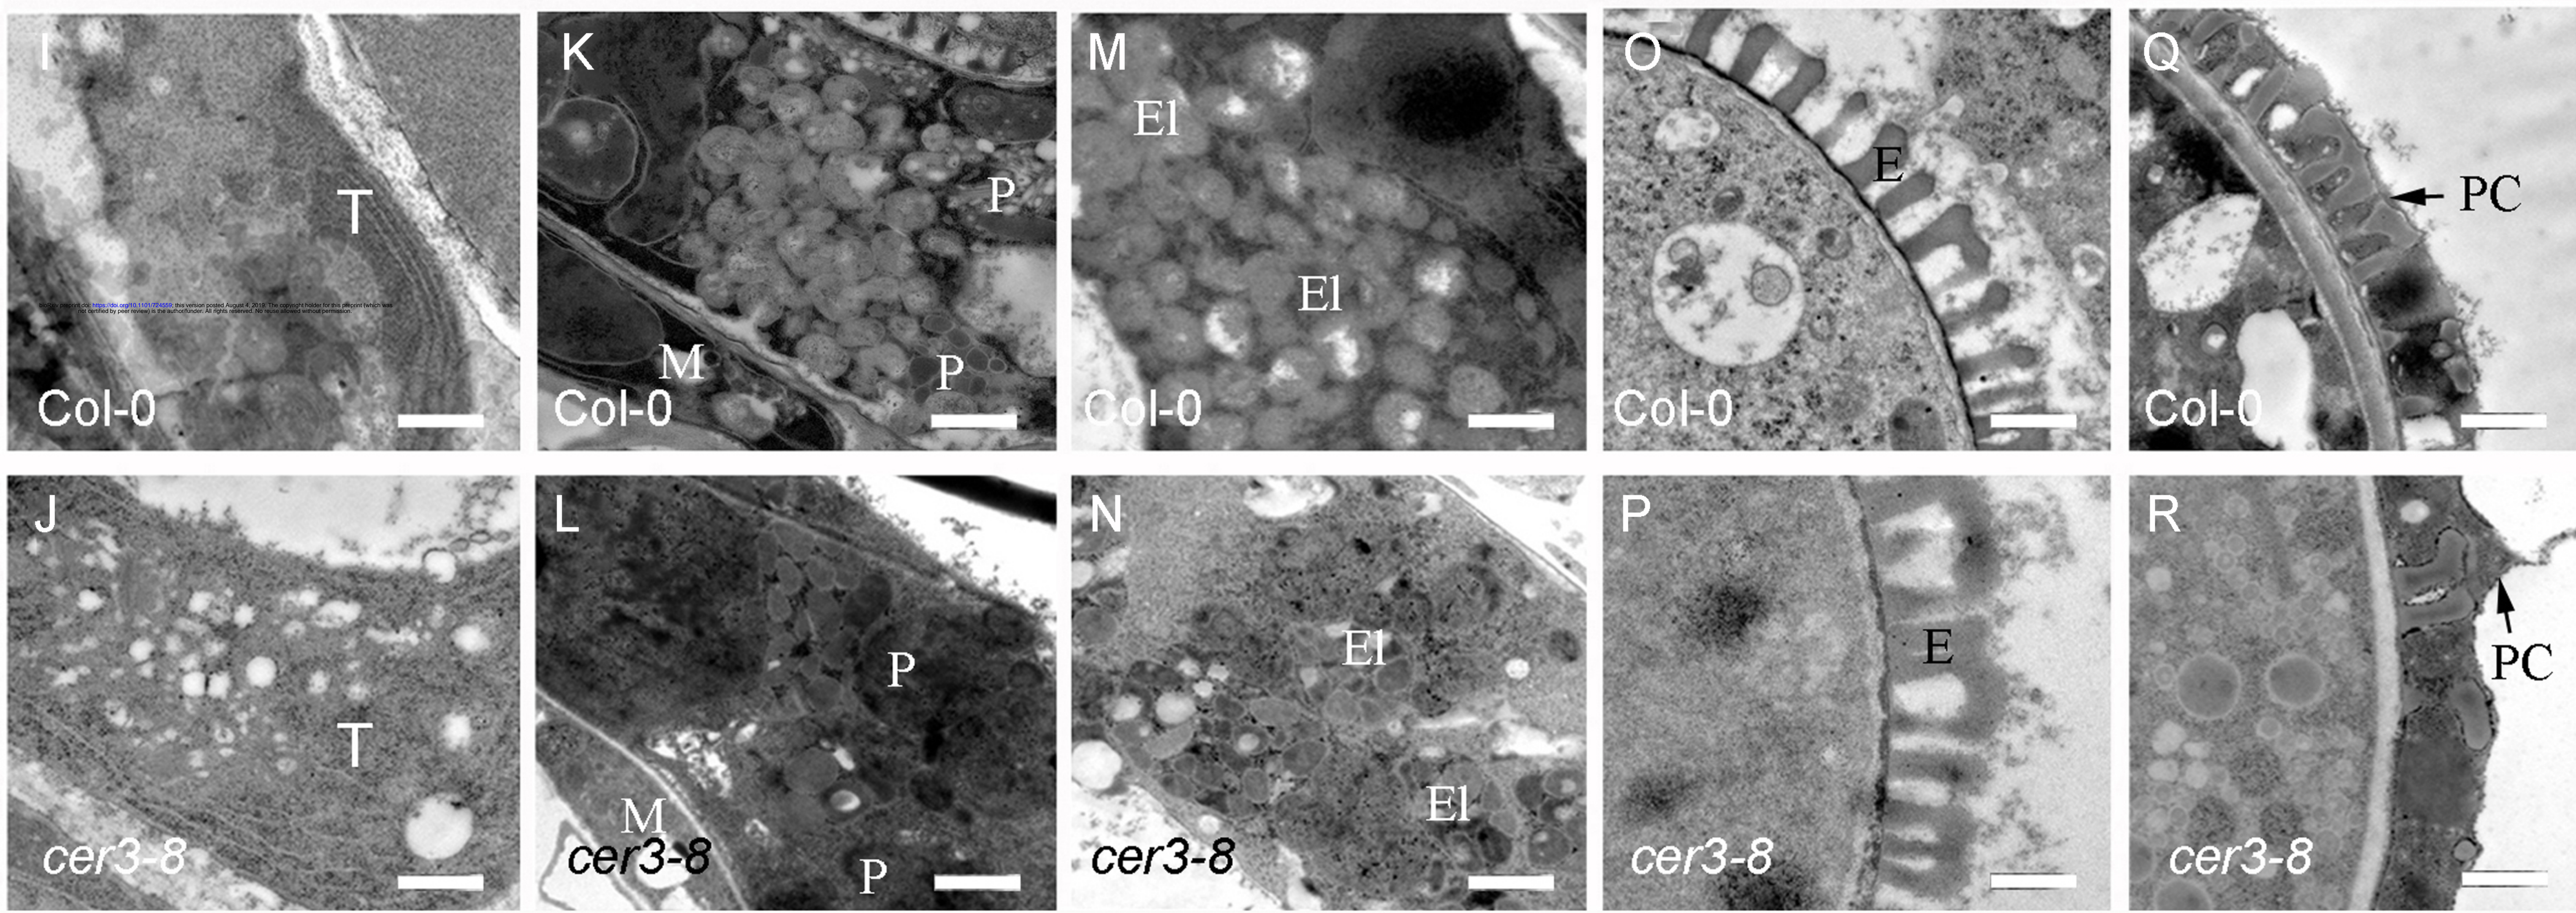

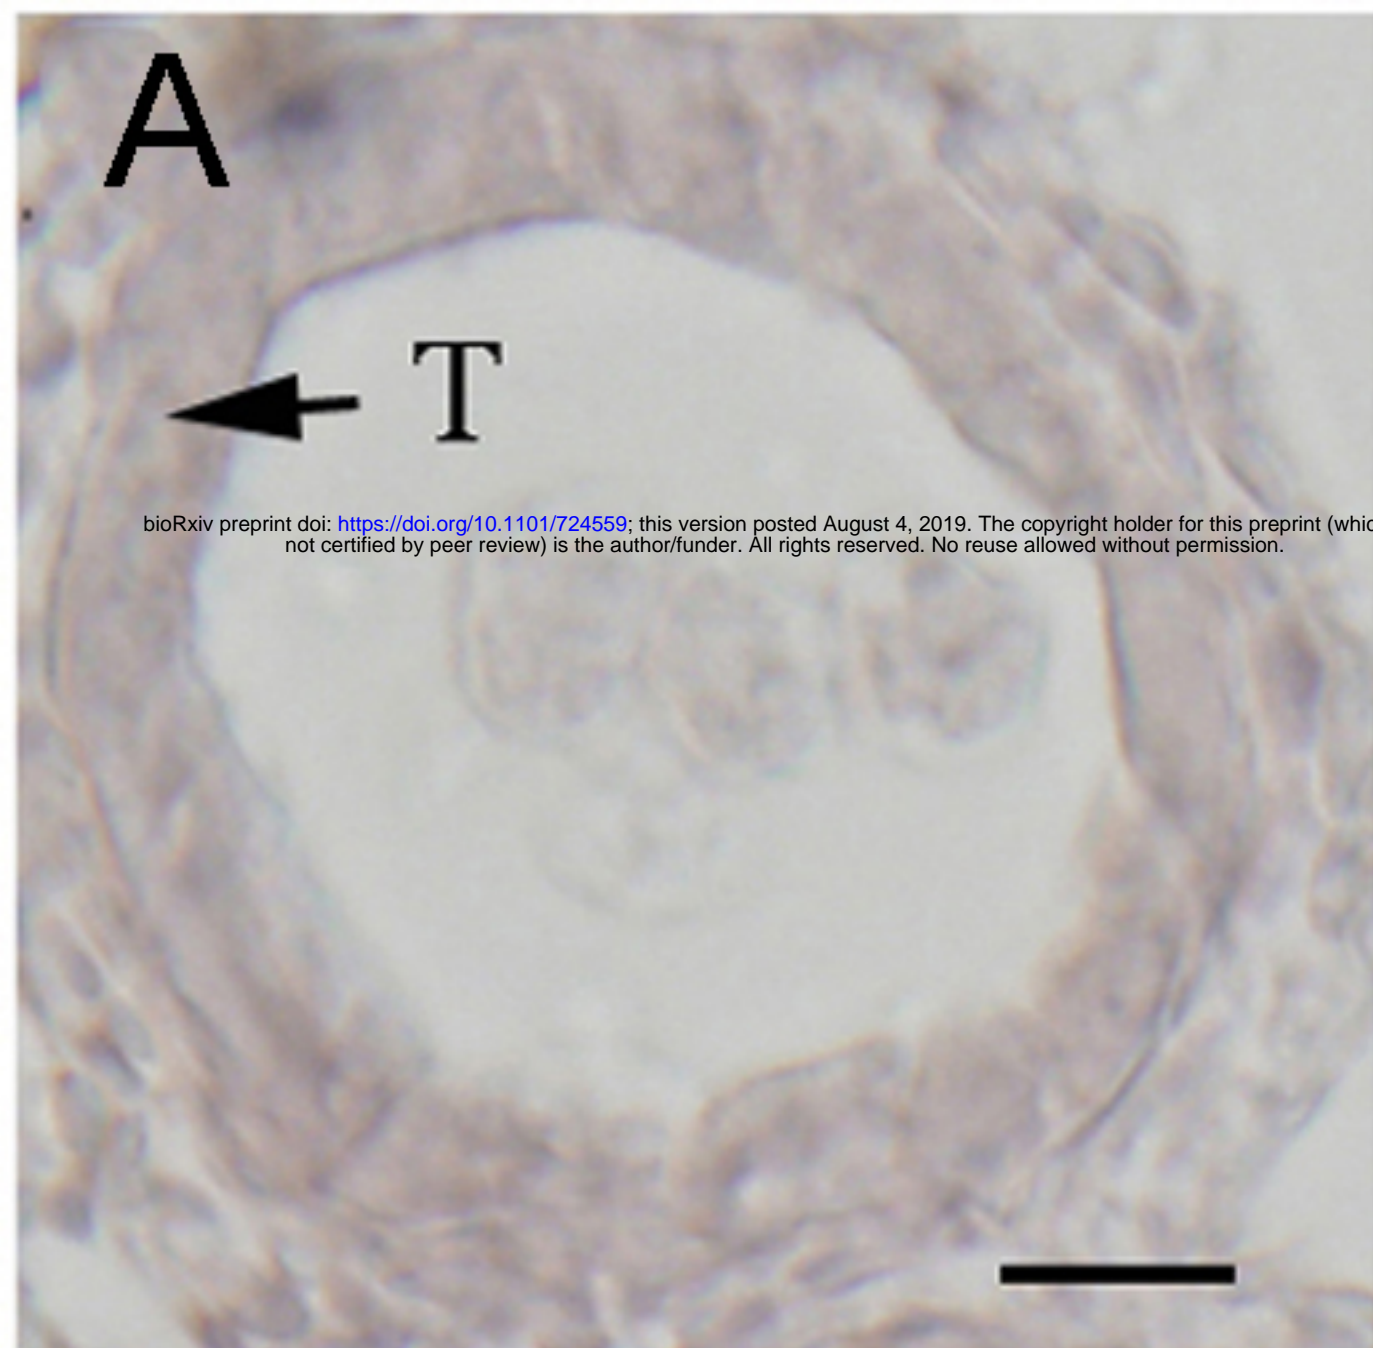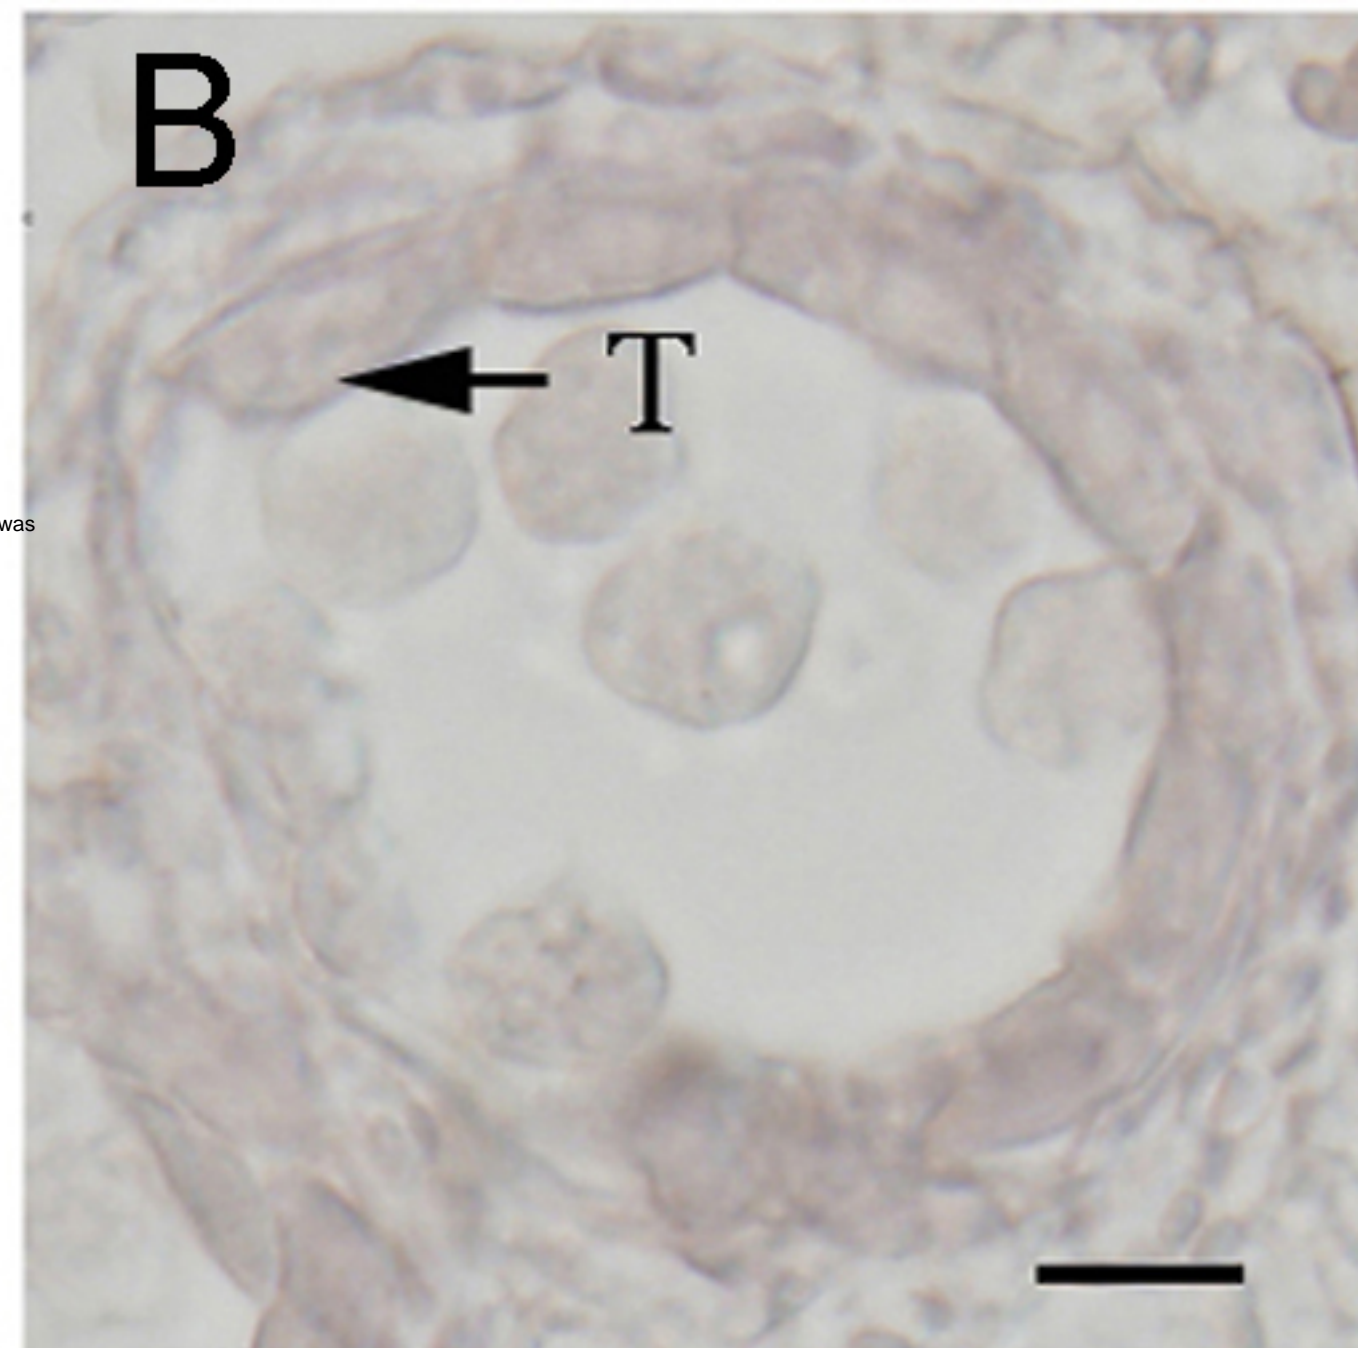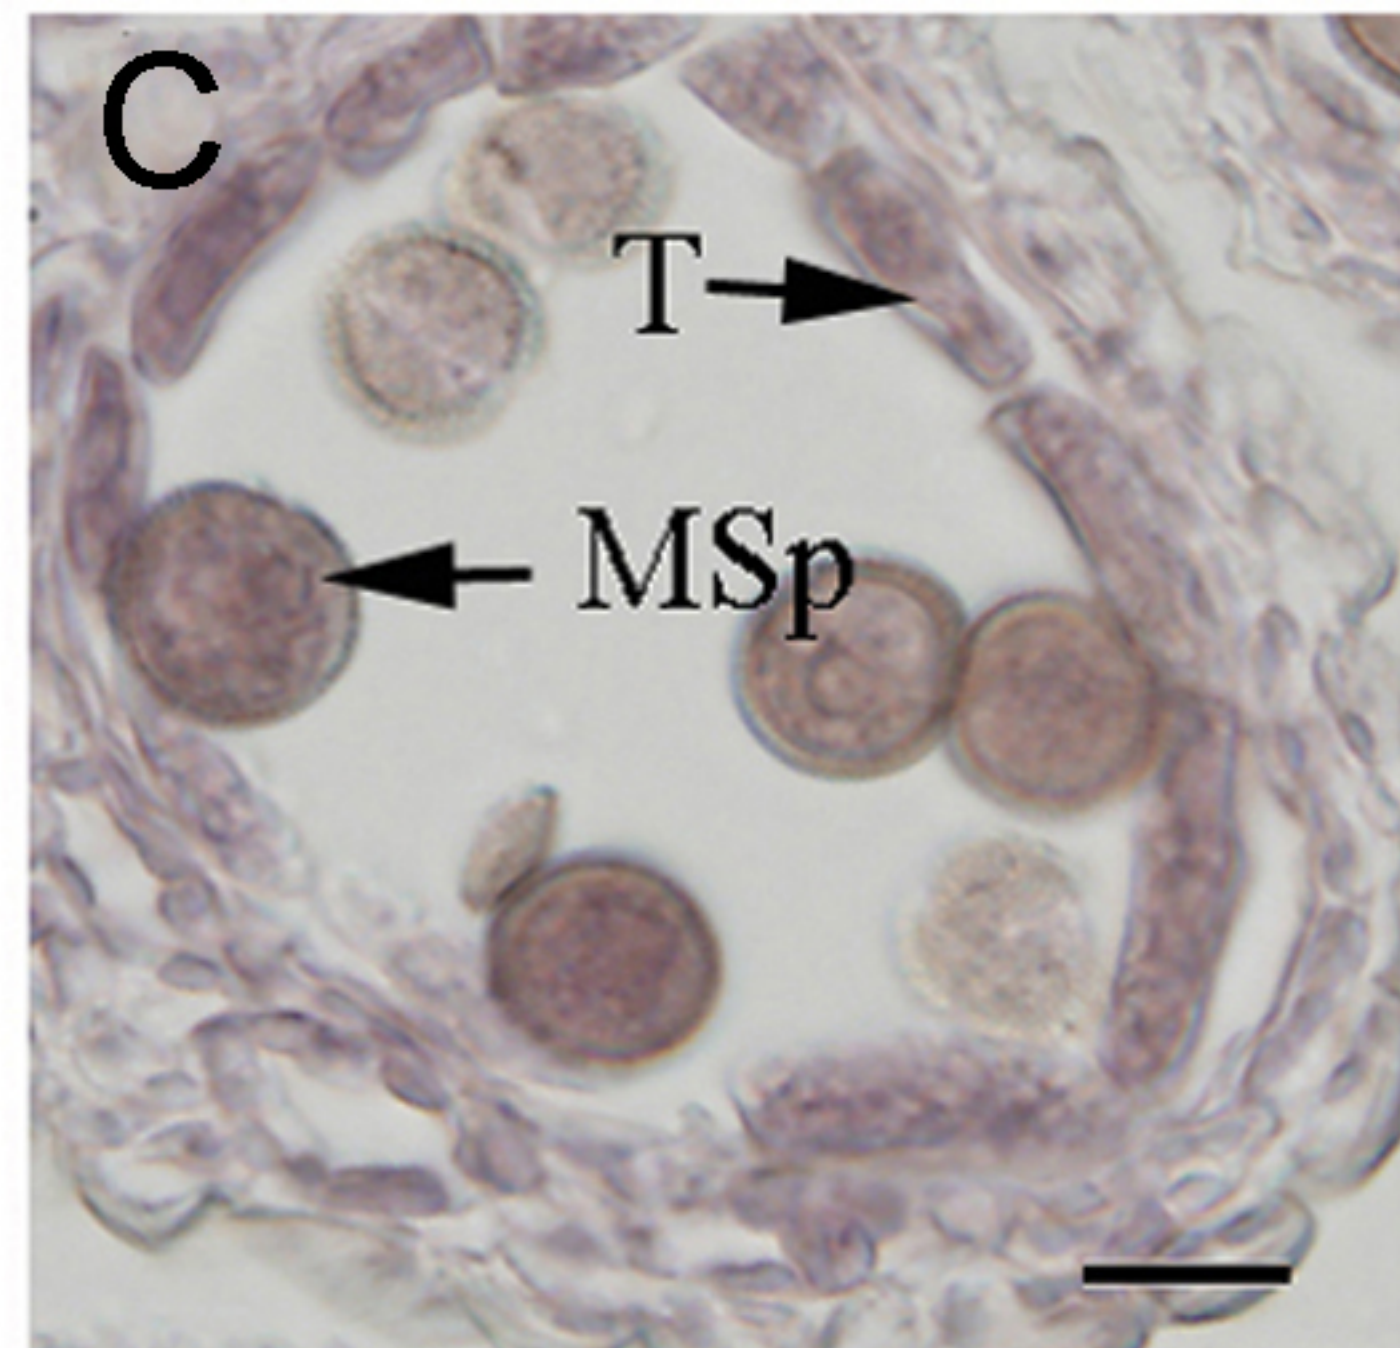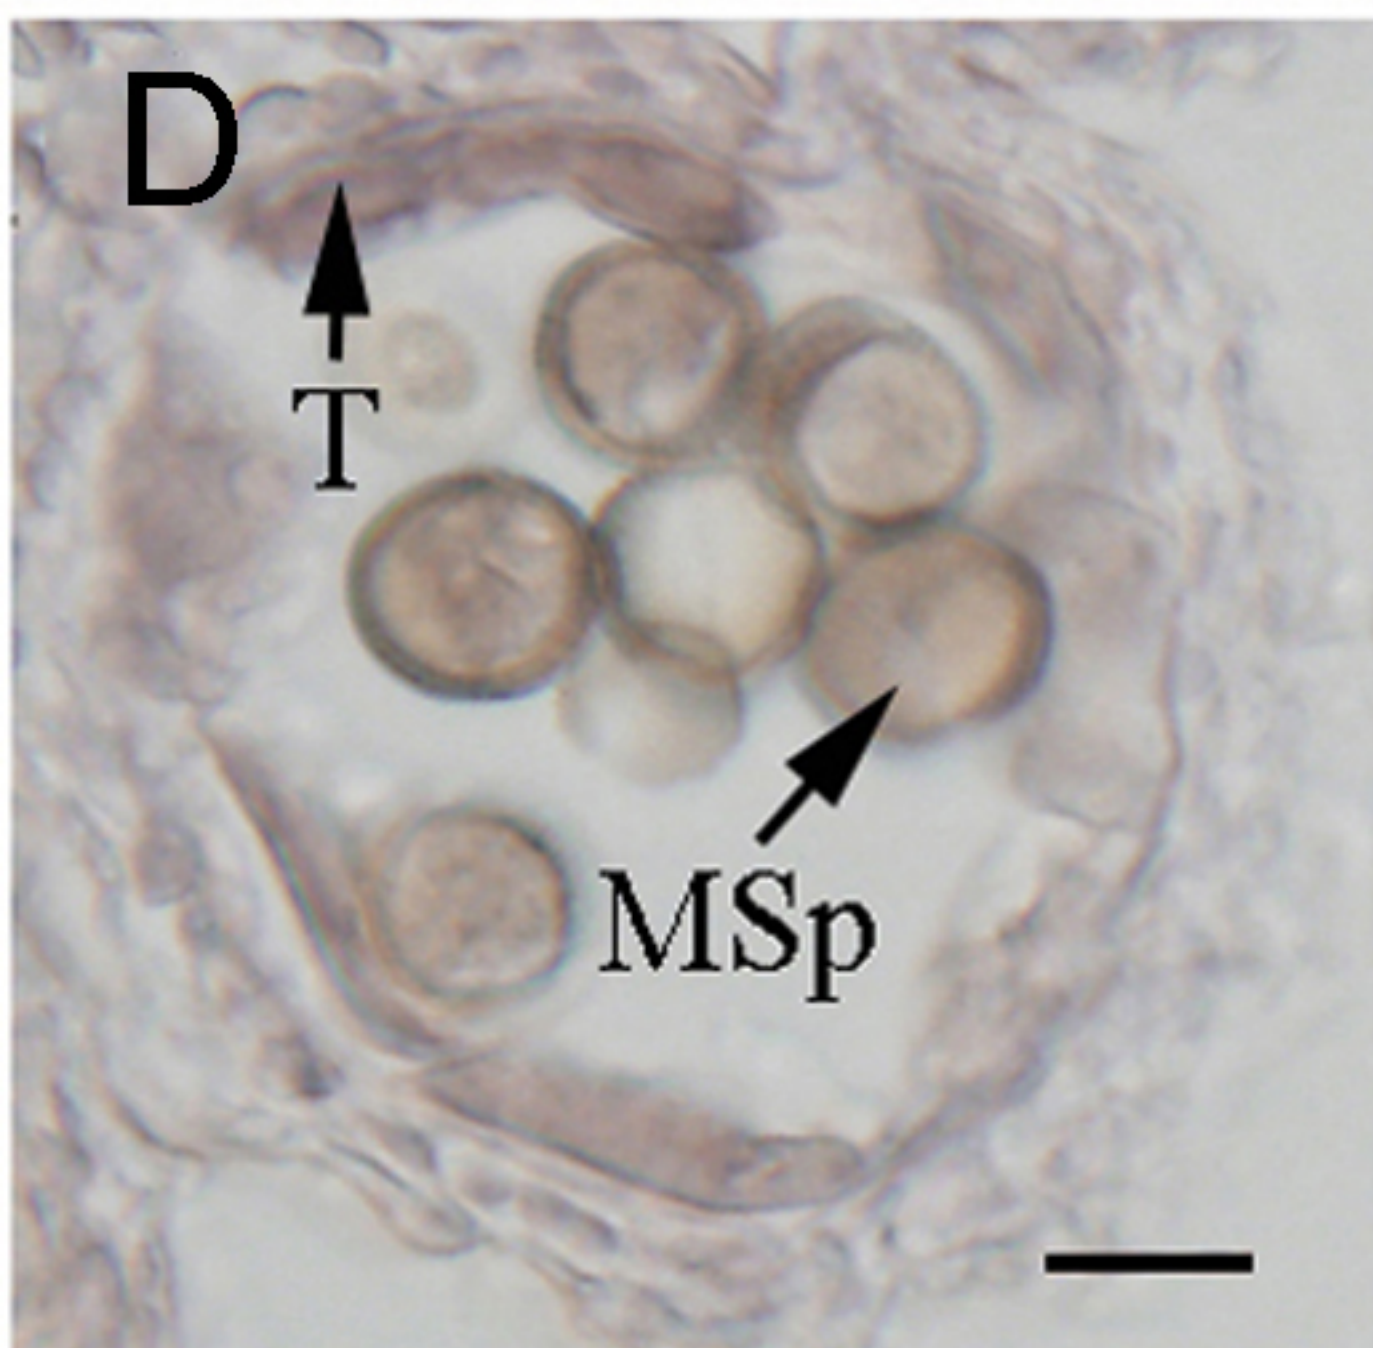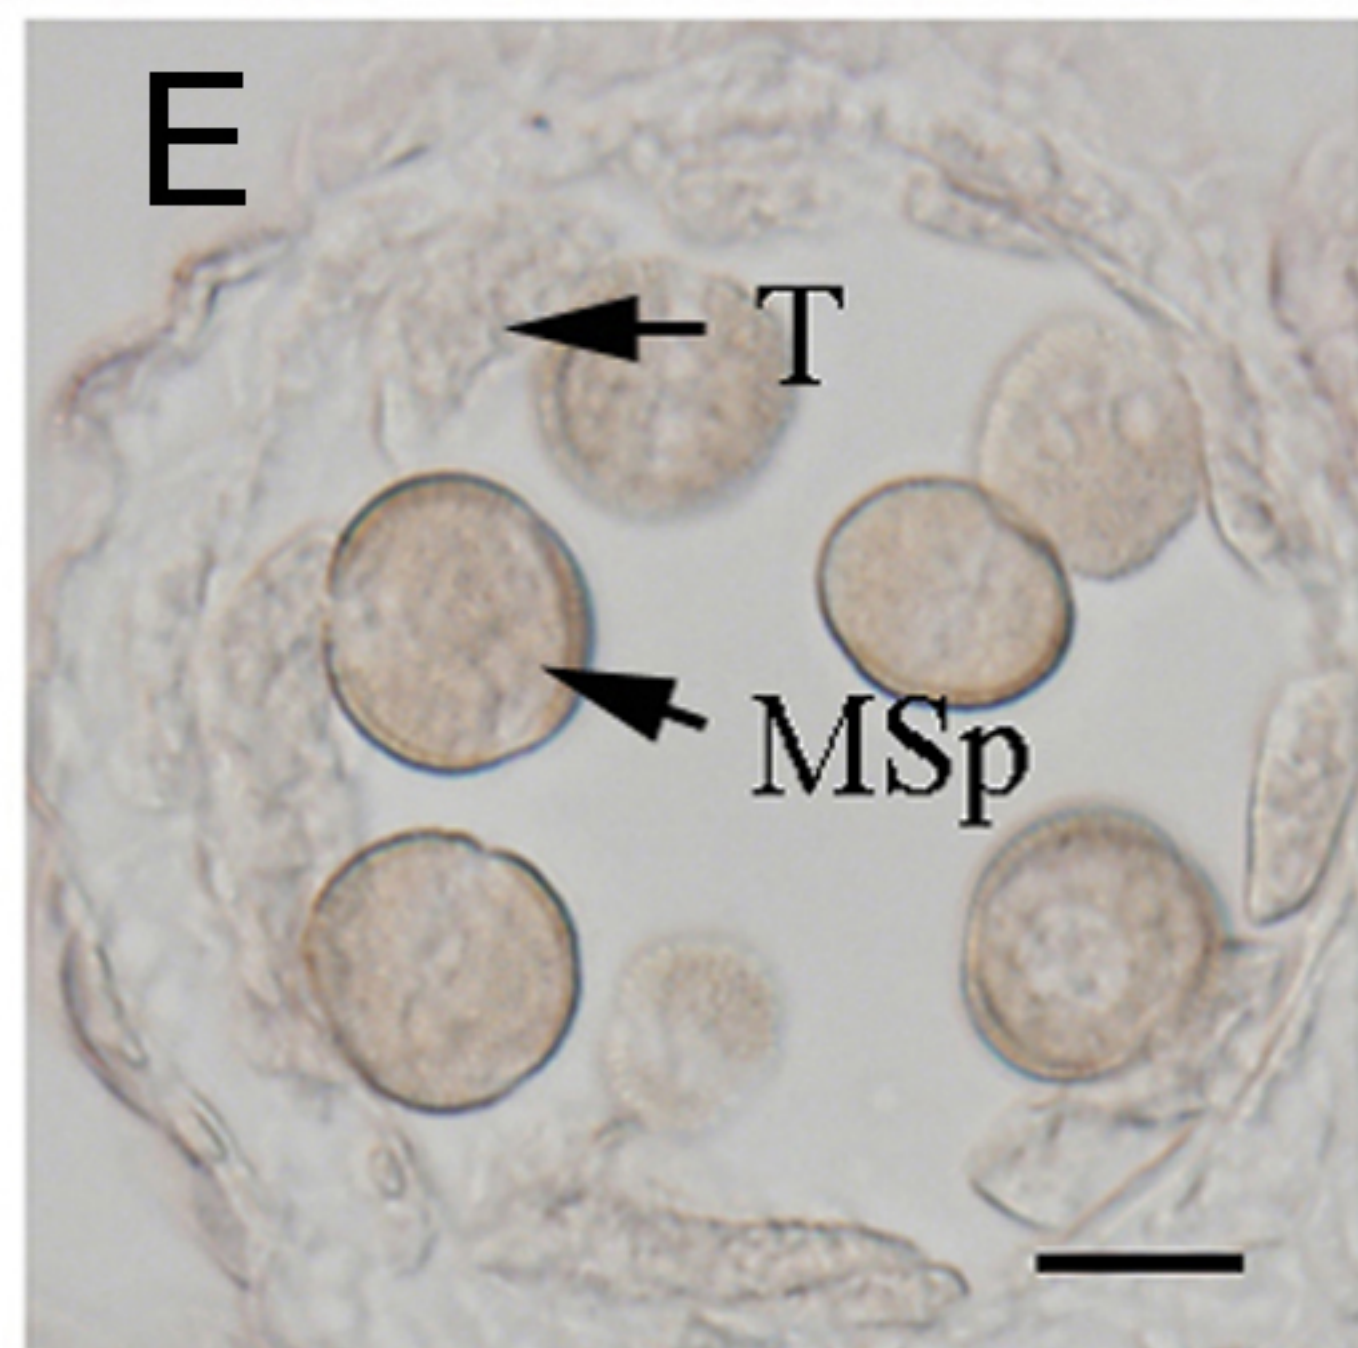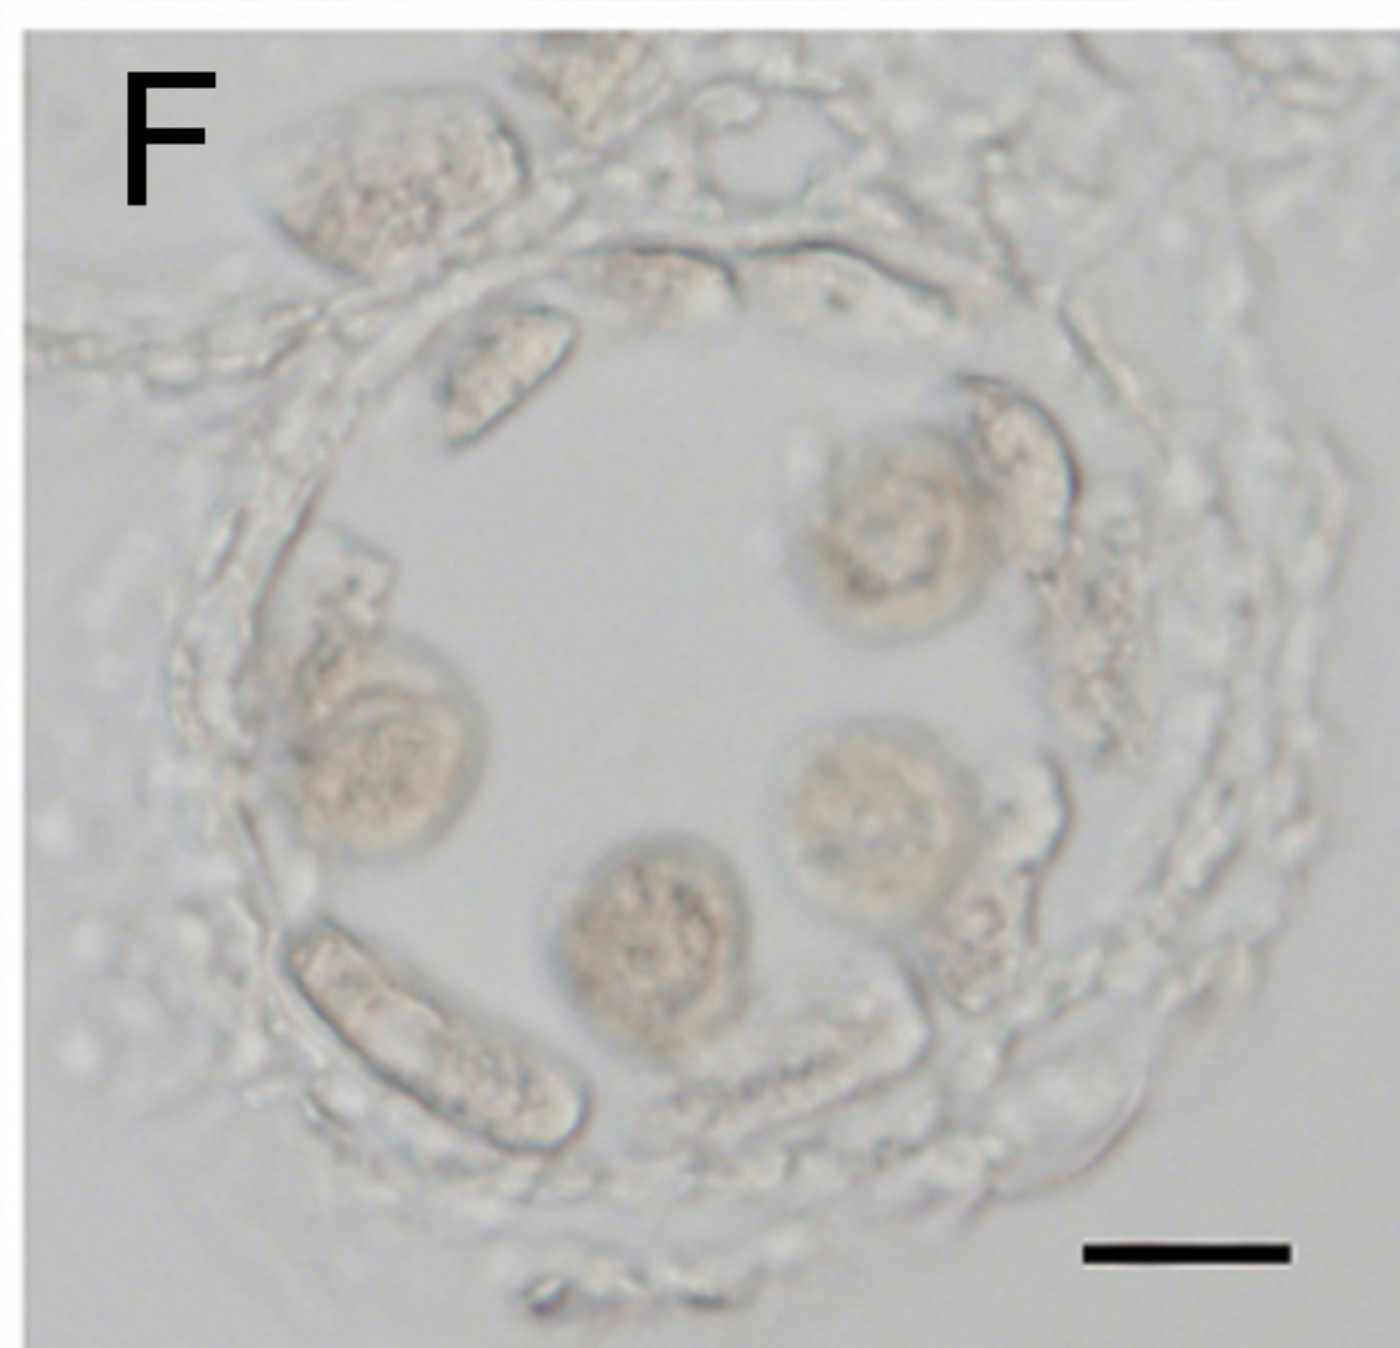

# TMHMM posterior probabilities for Sequence

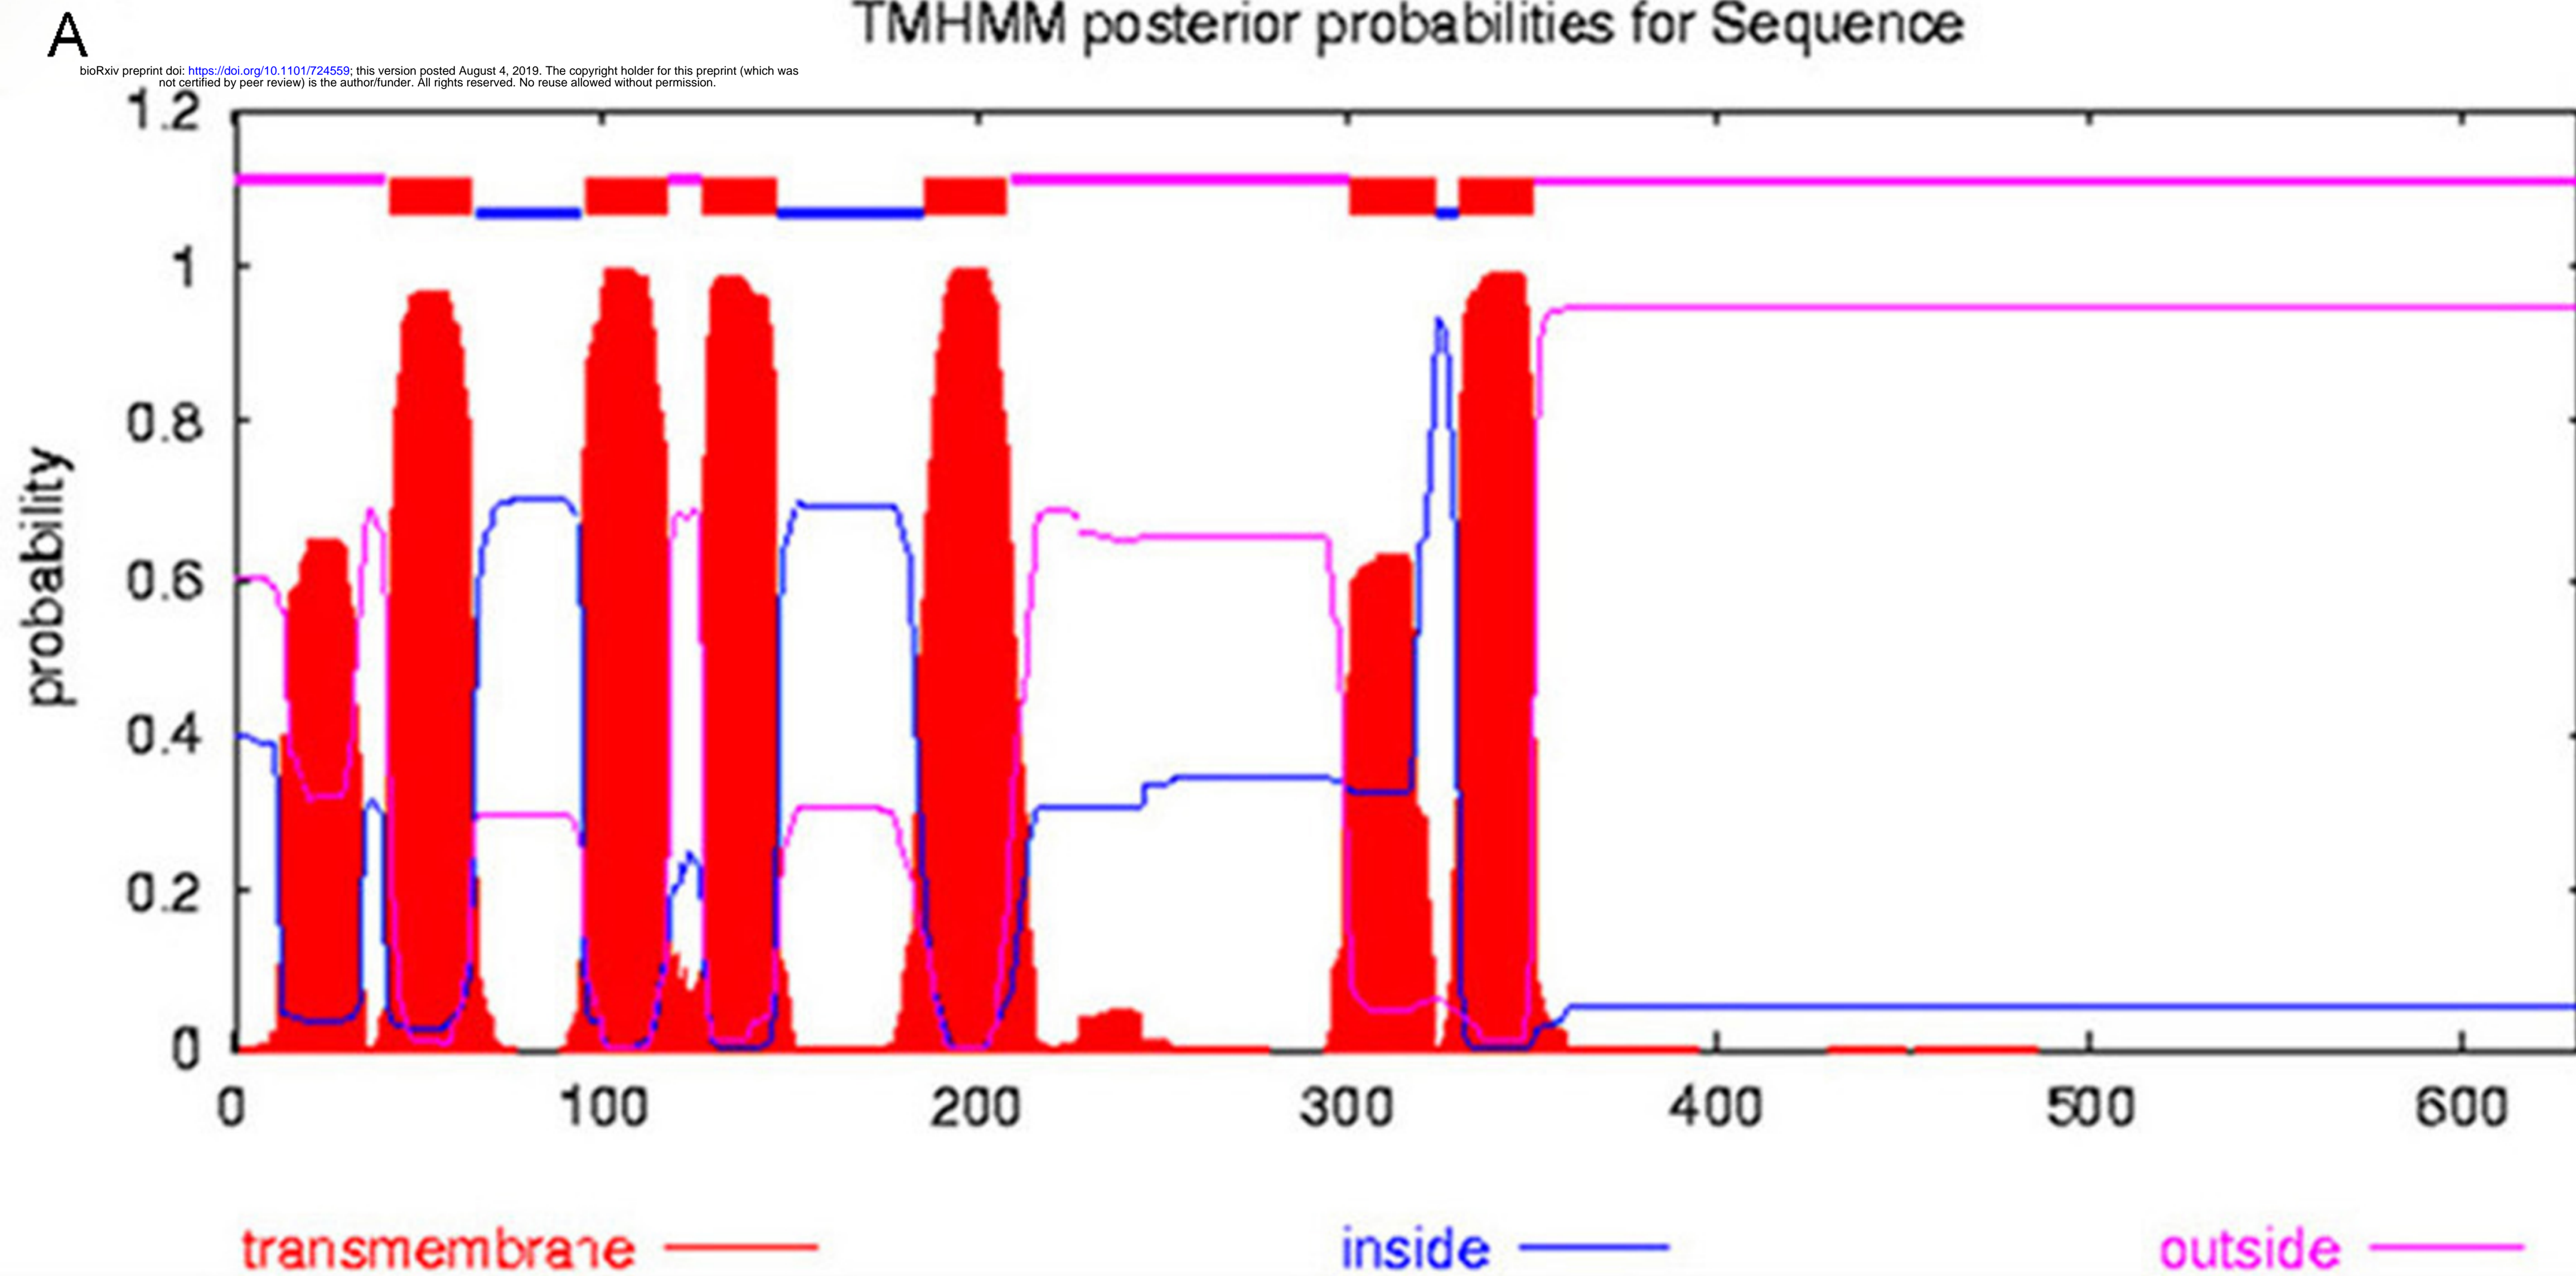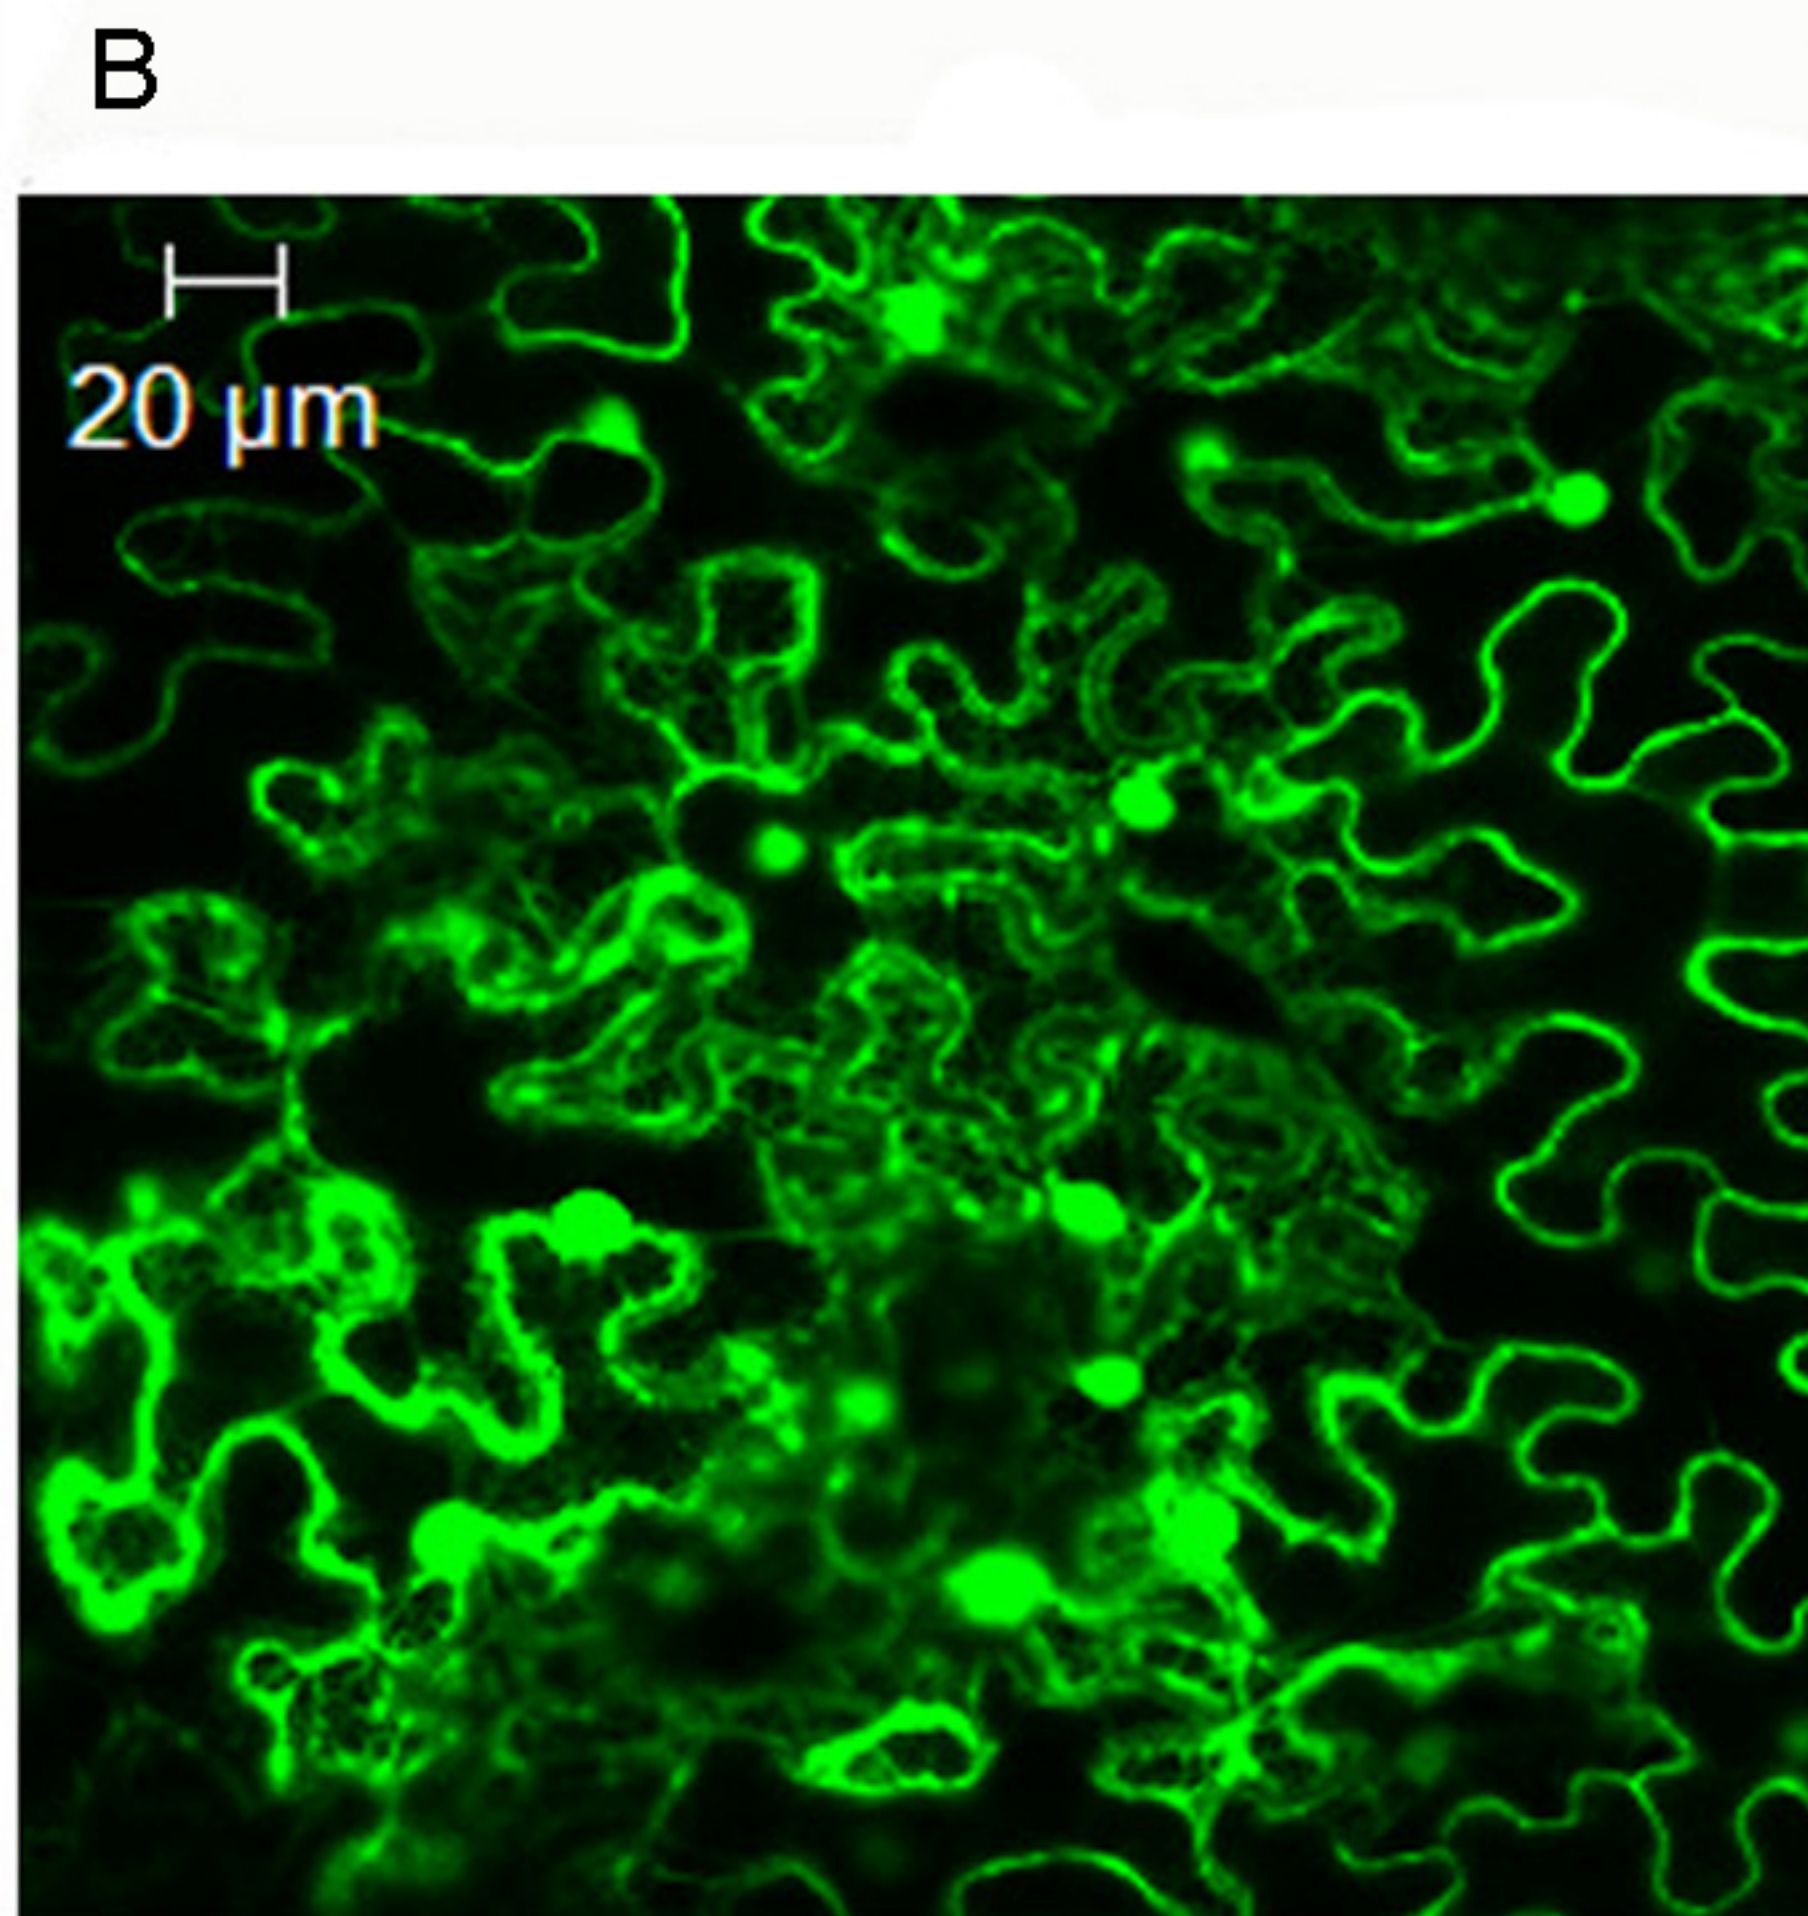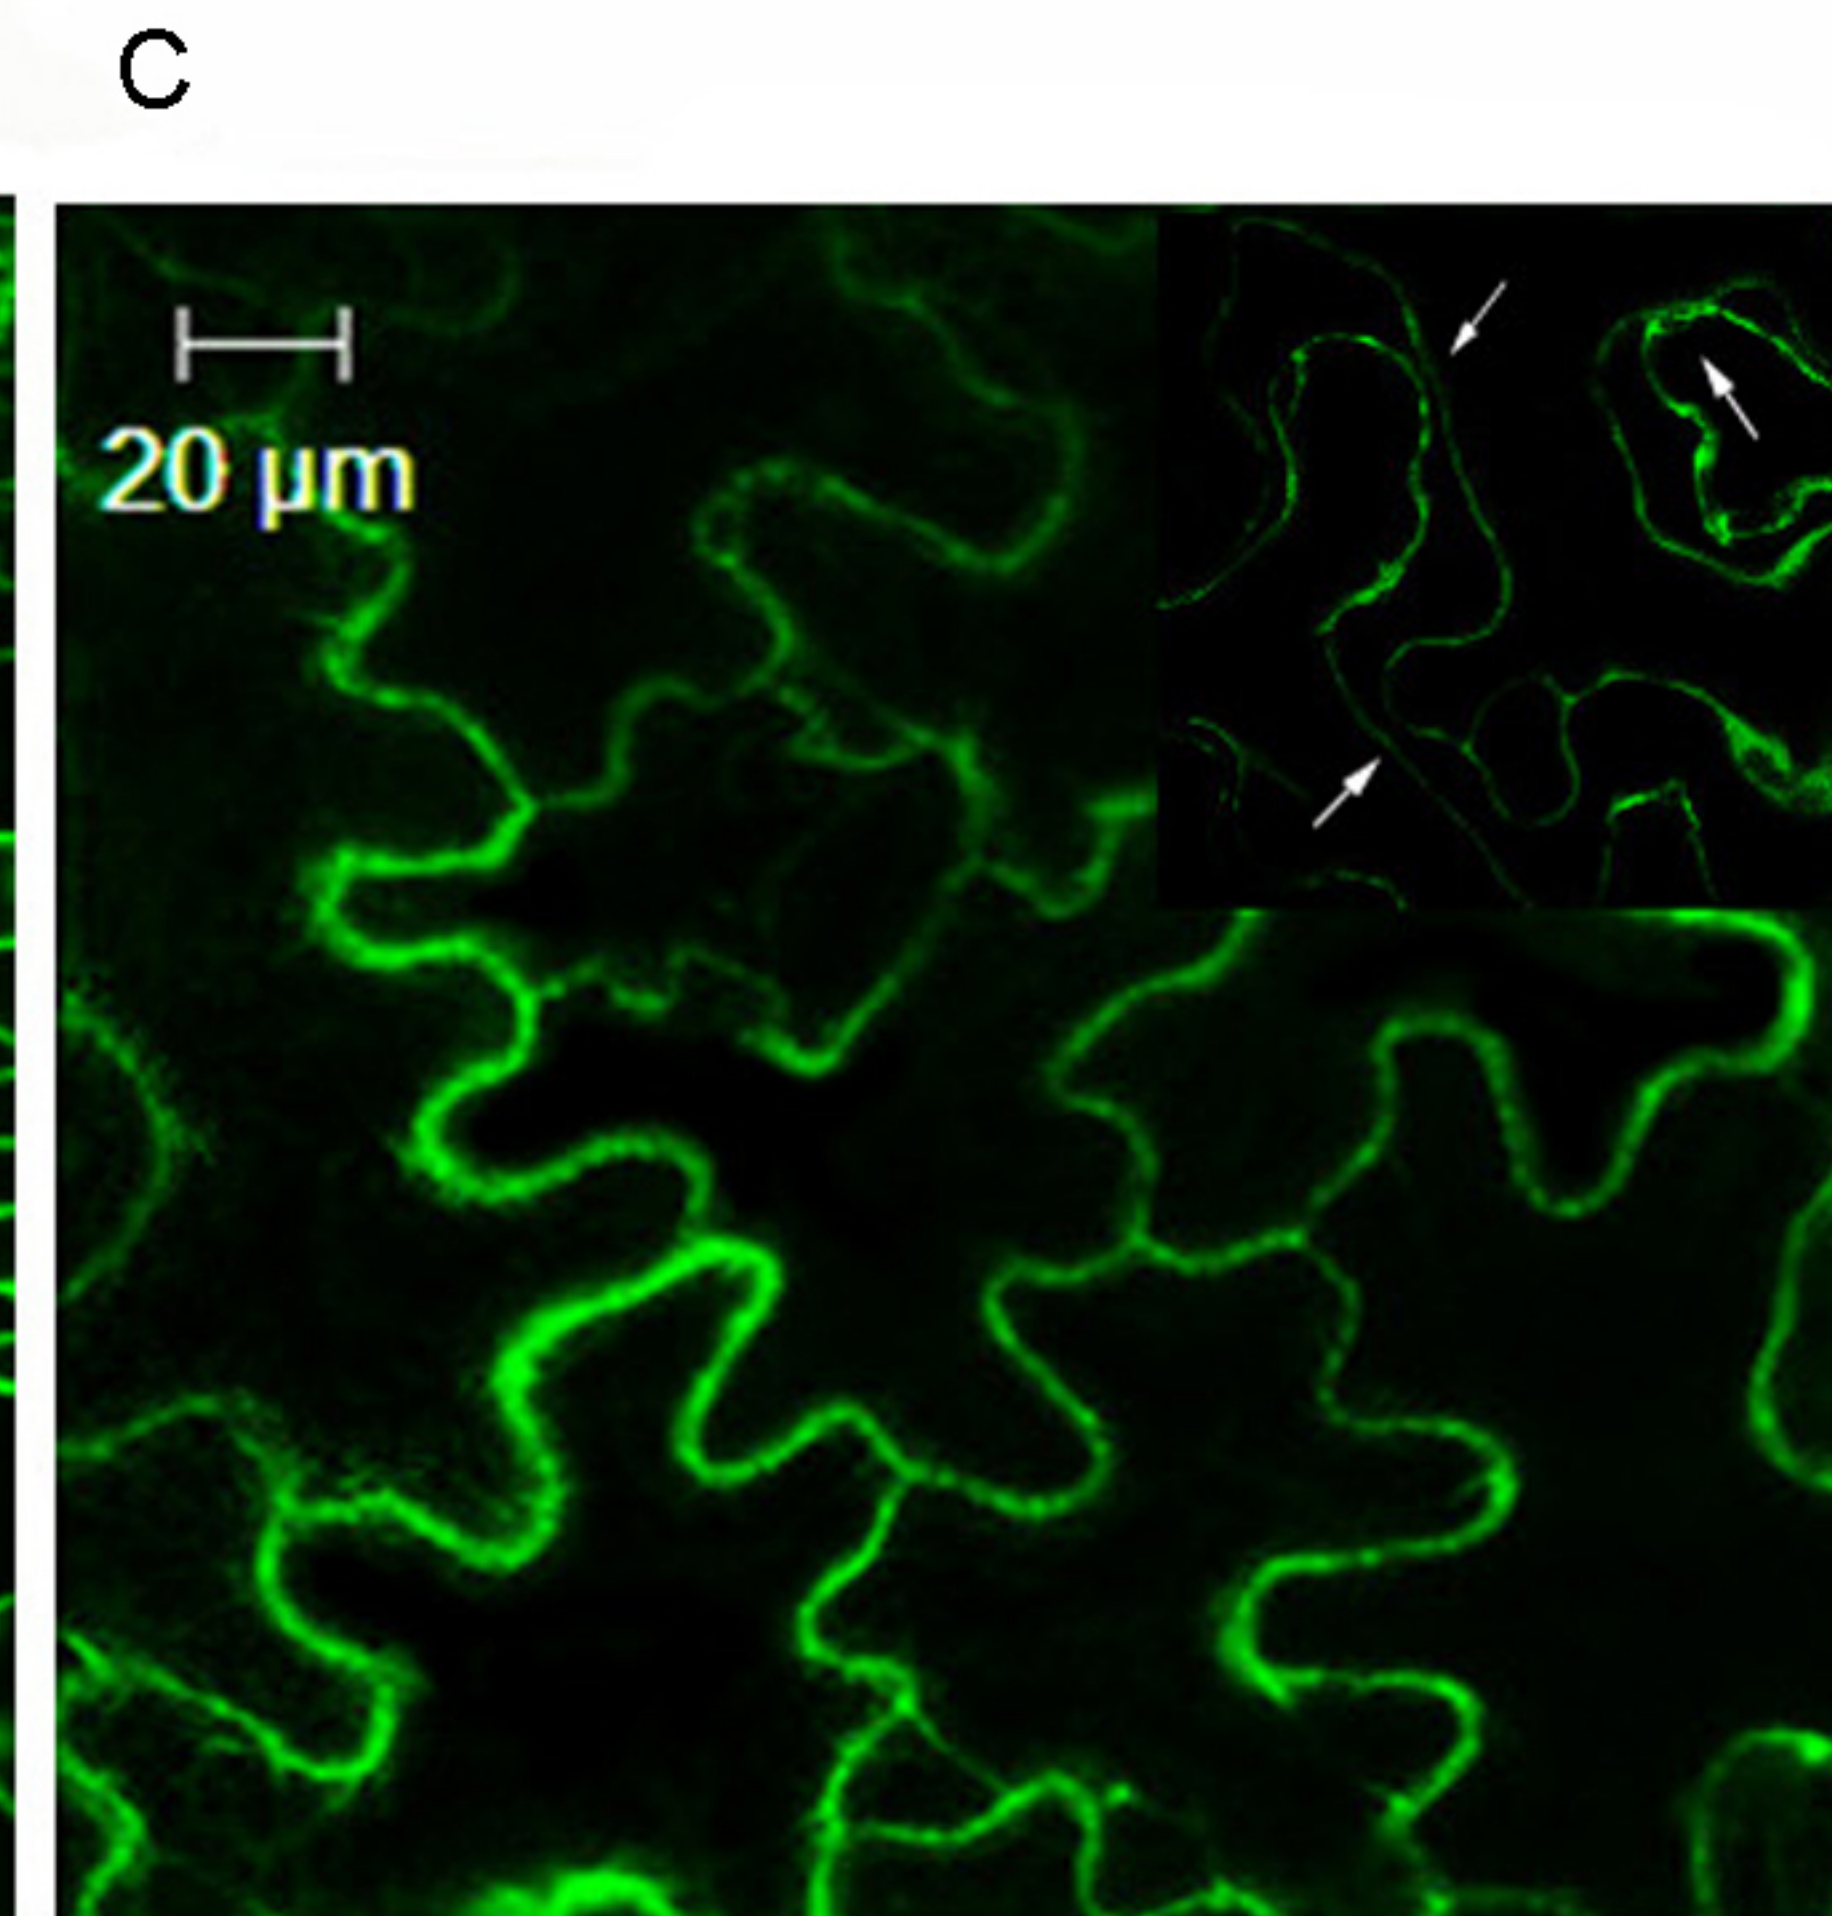

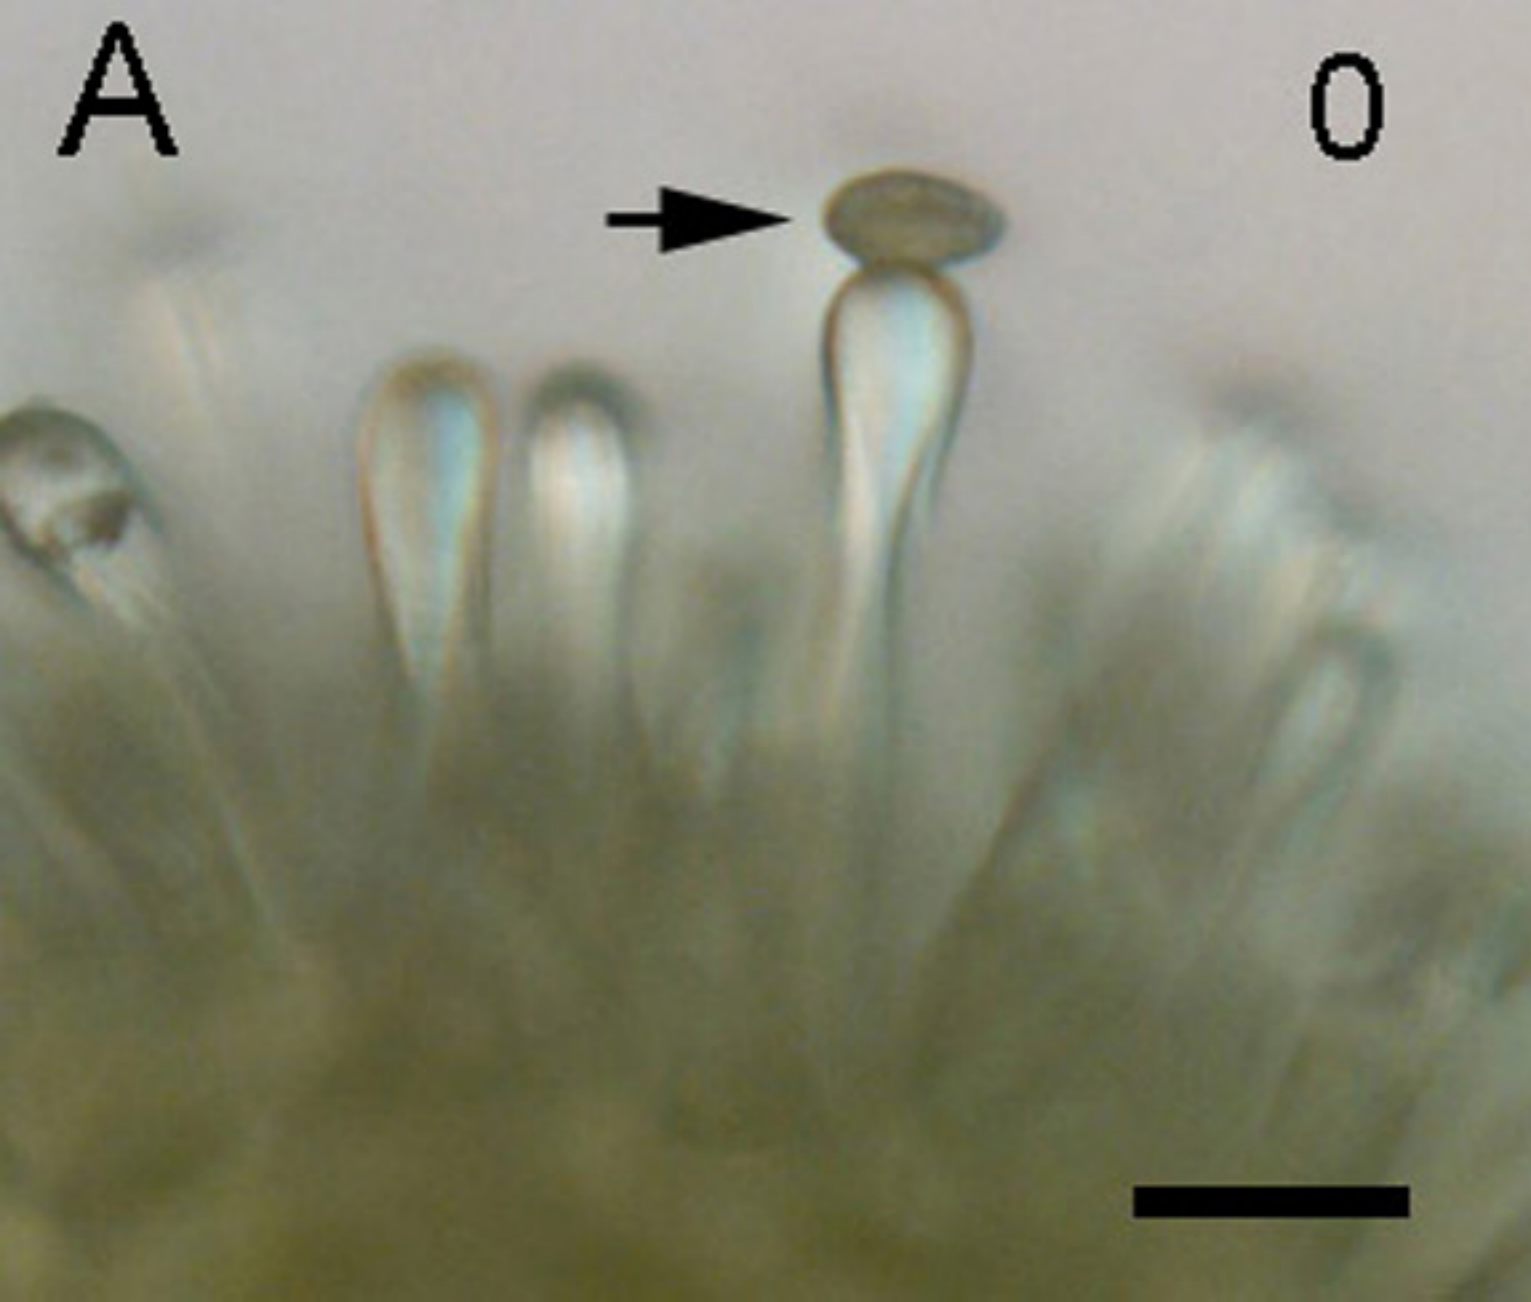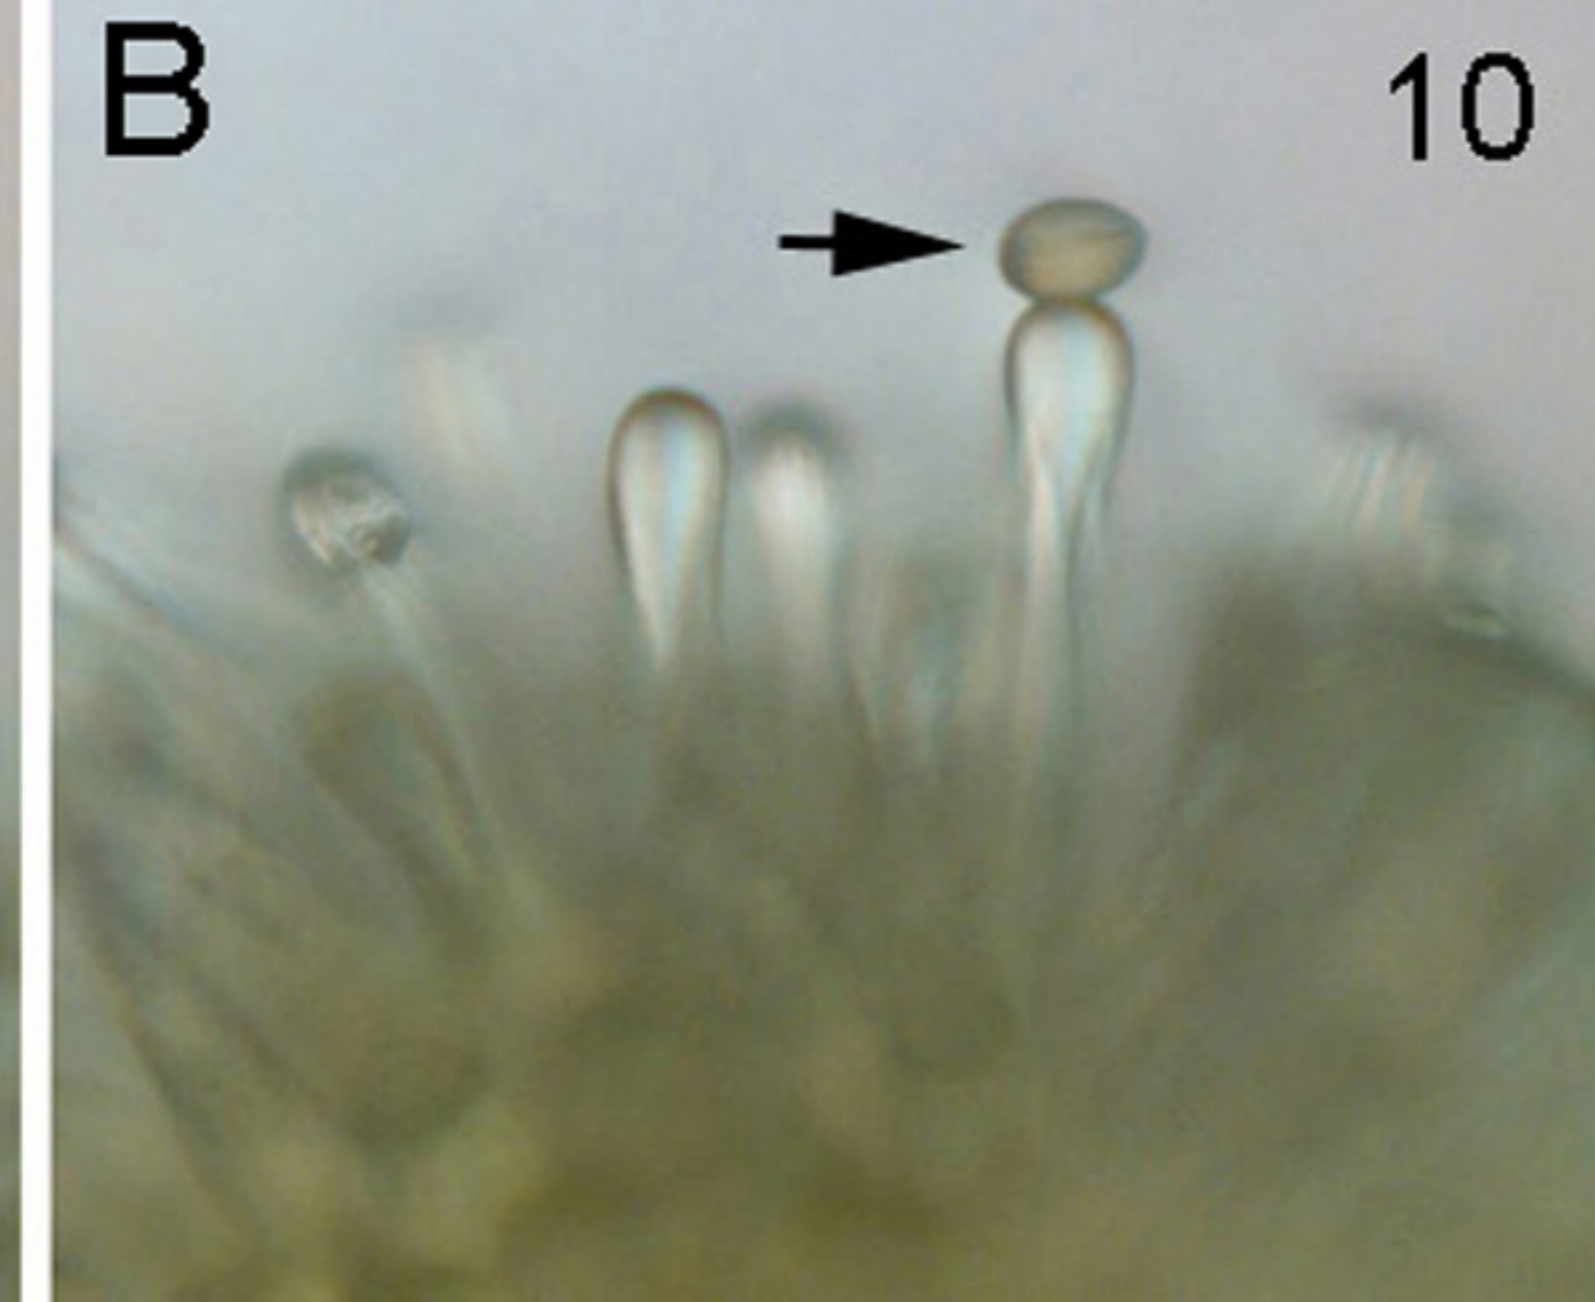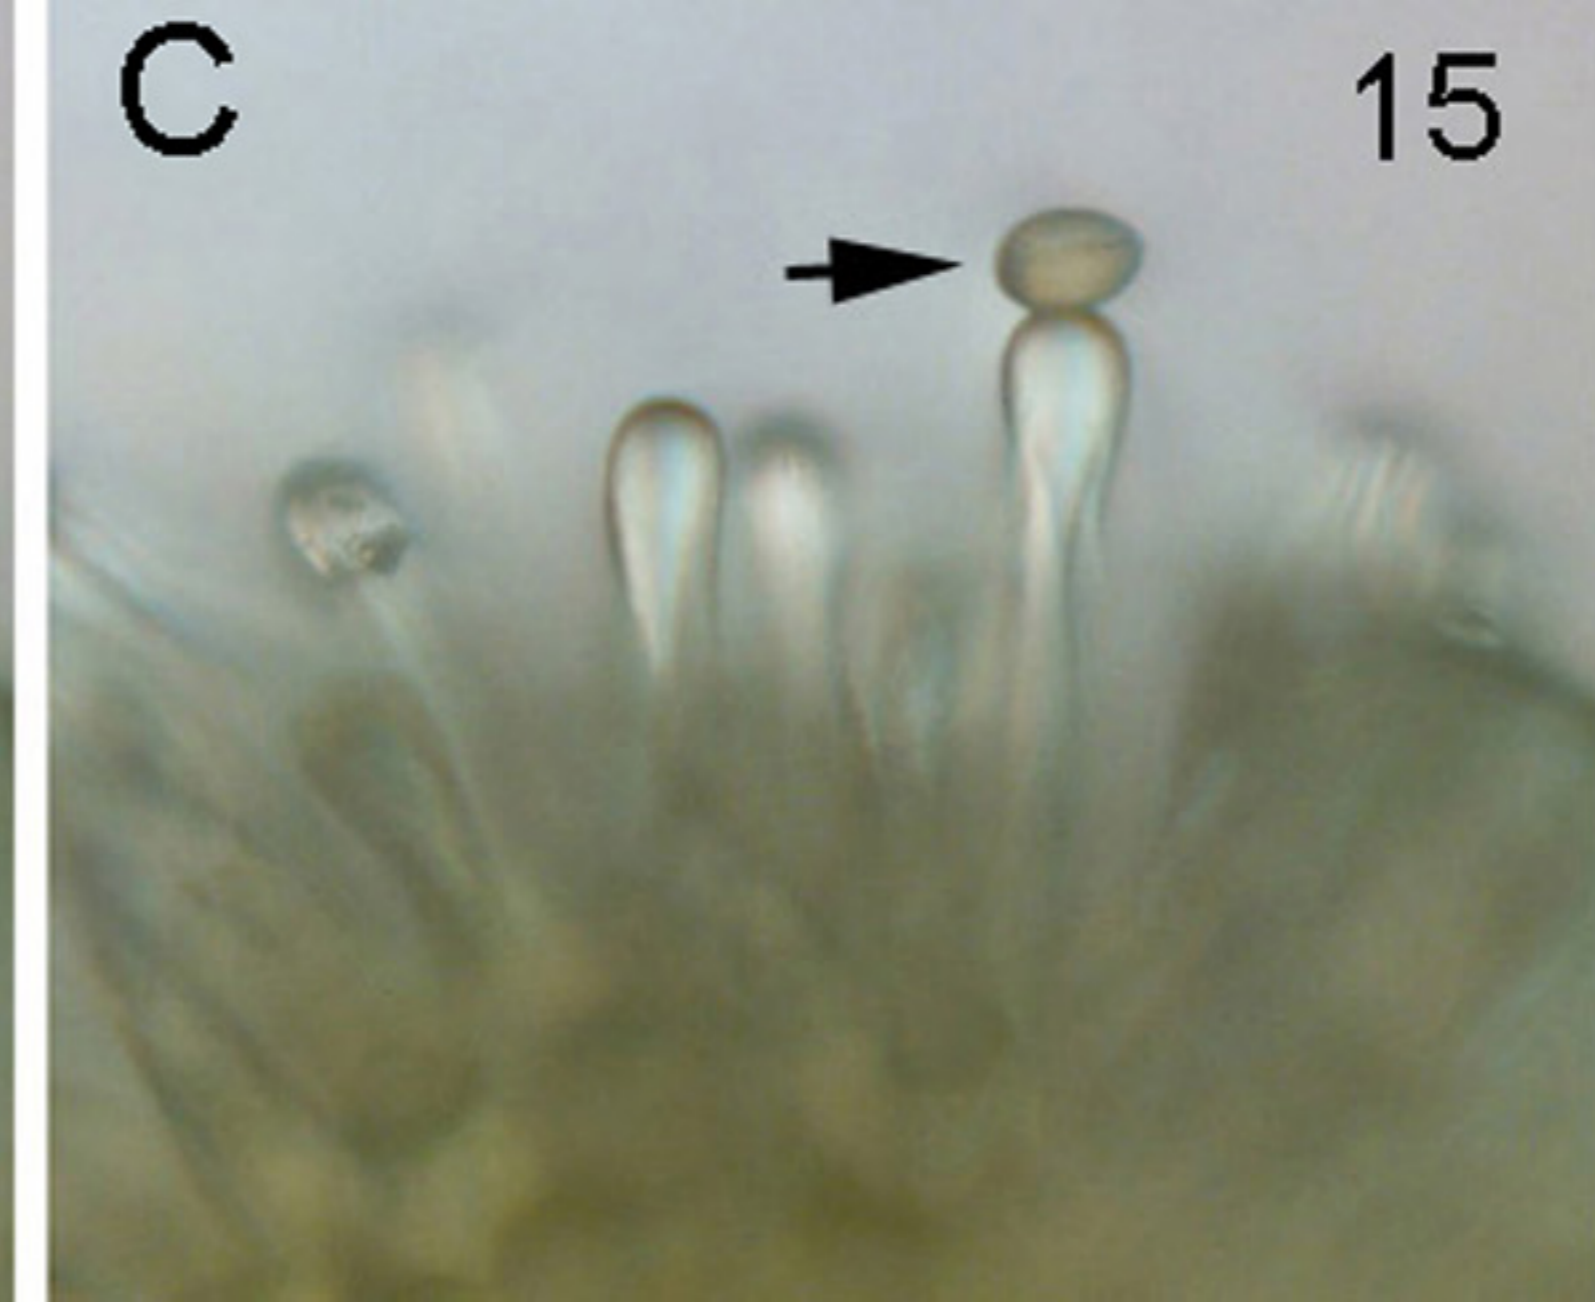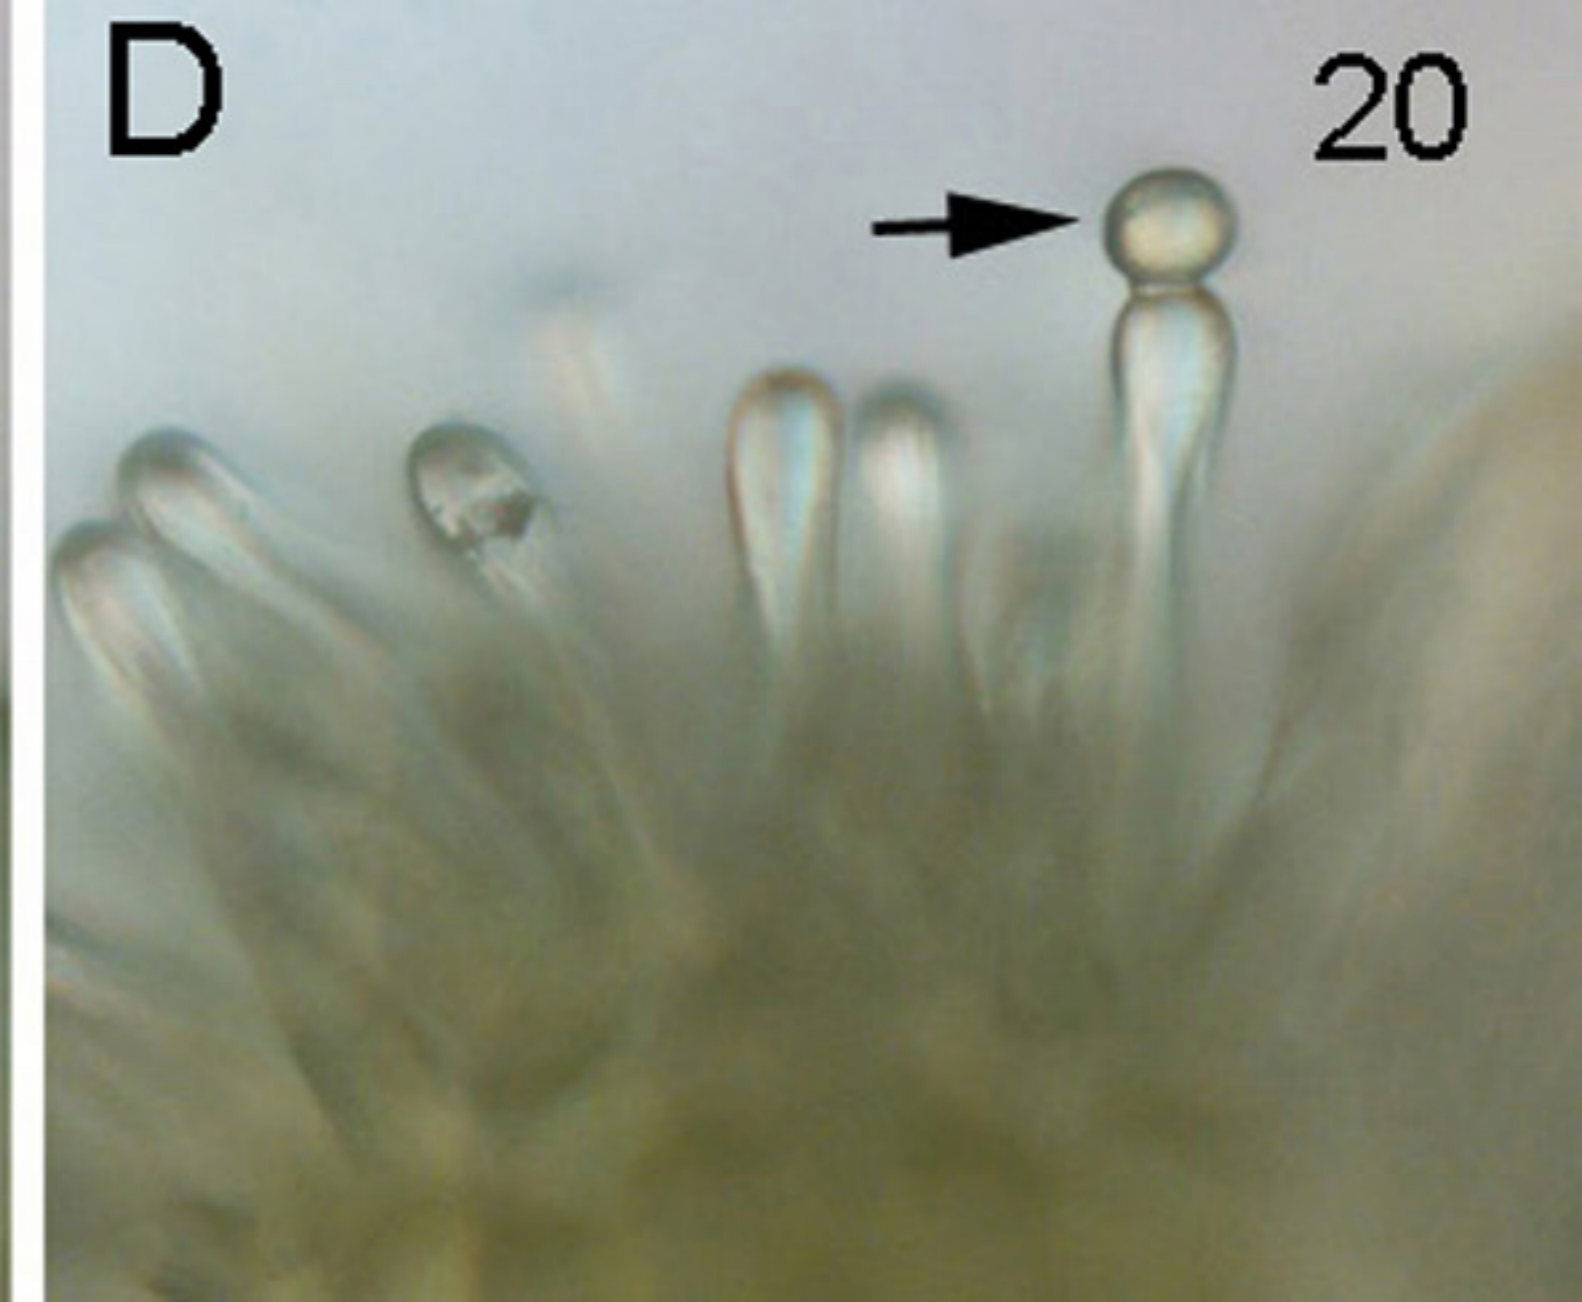

Source: https://www.biorxiv.org/content/10.1101/724559v1.full.pdf
